# Supplementary material
Source: PubMed Central journal article supplement (PMC7788265)
Supplement: gutjnl-2019-318918supp002.pdf [file gutjnl-2019-318918supp002.pdf]

Table S3

| Gene         | NASH        | HCV         |
|--------------|-------------|-------------|
| DPPA4        | -0.99149595 | -1.50988763 |
| RP11-423H2.  | -0.94754738 | -1.48155106 |
| ABCC6P2      | -1.24512898 | -1.44208662 |
| KCNN2        | -0.76184643 | -1.39228038 |
| CLRN1-AS1    | -0.96441909 | -1.3557784  |
| RP11-403I13. | -0.85779975 | -1.26410861 |
| GYG2         | -0.69968025 | -1.26305098 |
| RP11-205M3.  | -0.66576087 | -1.19639311 |
| AC114730.3   | -0.95312175 | -1.15783489 |
| U91319.1     | -0.59765221 | -1.15552389 |
| HSD17B3      | -0.93519793 | -1.15249858 |
| CES5A        | -0.58376485 | -1.15154589 |
| PZP          | -0.69107133 | -1.14231349 |
| ASXL3        | -0.43301035 | -1.13917046 |
| RP3-475N16.  | -1.13779469 | -0.98193217 |
| AGXT         | -1.12923854 | -0.75283994 |
| KCNK17       | -0.90529918 | -1.124968   |
| HORMAD2      | -1.09406334 | -1.11939868 |
| CAPN3        | -0.85622675 | -1.11518713 |
| RP11-164J13  | -0.85622679 | -1.11518708 |
| GNMT         | -1.1093108  | -1.01696047 |
| NEU4         | -0.9270435  | -1.10879394 |
| SLC6A13      | -0.90009565 | -1.09119231 |
| RP11-626H12  | -0.84179363 | -1.07827663 |
| GCK          | -1.06523593 | -0.86809113 |
| KANK4        | -0.74251028 | -1.0564263  |
| PPP1R1A      | -0.7017774  | -1.03625106 |
| LPA          | -0.49306007 | -1.0169621  |
| CNDP1        | -0.63792646 | -0.9987607  |
| ATAD3C       | -0.99811532 | -0.83210312 |
| CYP1A2       | -0.98668091 | -0.81786809 |
| AOC1         | -0.53624729 | -0.98432856 |
| MAD1L1       | -0.97826581 | -0.87221391 |
| CHRNA4       | -0.81746823 | -0.96924072 |
| RP11-261N11  | -0.81746808 | -0.96924071 |
| ESPNL        | -0.94309271 | -0.70166788 |
| TMTC1        | -0.4180584  | -0.94205862 |
| CTNNA3       | -0.42221582 | -0.94007736 |
| GSTA2        | -0.93792451 | -0.88896097 |
| RP11-168L7.1 | -0.48701285 | -0.93286311 |
| ACSM2B       | -0.91701906 | -0.89974648 |
| MROH7        | -0.89045029 | -0.91423505 |
| SLC2A4RG     | -0.9095737  | -0.59876869 |
| LIME1        | -0.90957369 | -0.59876869 |
| NAT2         | -0.48889312 | -0.90882634 |
| MME          | -0.78982822 | -0.90698252 |
| APOC3        | -0.89246412 | -0.45008406 |
| APOA1        | -0.89246411 | -0.45008404 |

Table S3

|             |             |             |
|-------------|-------------|-------------|
| GCGR        | -0.89023552 | -0.62501281 |
| ACADS       | -0.78259387 | -0.88482951 |
| IGFALS      | -0.88450169 | -0.6259388  |
| CPNE6       | -0.87891263 | -0.80760341 |
| CYP2E1      | -0.73994513 | -0.87852408 |
| RP4-601P9.2 | -0.77082548 | -0.87729331 |
| THOP1       | -0.86939272 | -0.74055984 |
| GCDH        | -0.86451674 | -0.61958447 |
| FAM151A     | -0.83402025 | -0.85612392 |
| LINC00844   | -0.64764145 | -0.84587488 |
| AOX1        | -0.43160766 | -0.84293406 |
| TBX3        | -0.63799608 | -0.84108221 |
| TRIM55      | -0.41269109 | -0.84011324 |
| SLC22A25    | -0.61387539 | -0.83916424 |
| RBP4        | -0.83168116 | -0.72002451 |
| RP11-6B4.1  | -0.48612421 | -0.82930402 |
| PRODH2      | -0.82671595 | -0.78277324 |
| PCOLCE2     | -0.67769587 | -0.8229104  |
| CXXC4       | -0.49948404 | -0.82209373 |
| ORM2        | -0.48125488 | -0.82026193 |
| TRPC5       | -0.43558564 | -0.81958049 |
| GPR88       | -0.81941466 | -0.61700657 |
| CNPY3       | -0.81711475 | -0.71387346 |
| PPP1R32     | -0.81701208 | -0.54806826 |
| FITM1       | -0.6639242  | -0.81316963 |
| C1orf226    | -0.72632656 | -0.81225523 |
| PDLIM1P4    | -0.44372511 | -0.81068592 |
| RGN         | -0.8093521  | -0.64054053 |
| C3P1        | -0.67831697 | -0.80805497 |
| ETNK2       | -0.80482527 | -0.67150957 |
| CES1P1      | -0.79369268 | -0.80408941 |
| NAGS        | -0.80097203 | -0.71944772 |
| ZGPAT       | -0.79965053 | -0.51234221 |
| FADS6       | -0.73288221 | -0.79342869 |
| HAO2-IT1    | -0.59955733 | -0.79336794 |
| KBTBD11     | -0.40521894 | -0.79100922 |
| MAGI2-AS3   | -0.35584842 | -0.78285799 |
| SLC7A9      | -0.78097086 | -0.76962553 |
| GFRA1       | -0.55440634 | -0.78061658 |
| CTD-2529O2  | -0.53112617 | -0.78012415 |
| SNTG1       | -0.55097541 | -0.77969493 |
| RP11-113I22 | -0.7130455  | -0.77938329 |
| MEX3A       | -0.522985   | -0.77832605 |
| TYK2        | -0.65803804 | -0.7777852  |
| MOGAT2      | -0.71494902 | -0.77733915 |
| Y_RNA       | -0.57640779 | -0.77705699 |
| SMO         | -0.69834739 | -0.77436359 |
| RP11-475O6  | -0.49405245 | -0.77418792 |
| RP11-115J16 | -0.55973102 | -0.77241533 |

Table S3

|              |             |             |
|--------------|-------------|-------------|
| RP11-417L19  | -0.77042498 | -0.62416275 |
| ALDH1L1-AS   | -0.63925942 | -0.77040614 |
| AR           | -0.59966299 | -0.76993595 |
| WFIKKN1      | -0.76945835 | -0.60842709 |
| FAM35BP      | -0.72495655 | -0.76611146 |
| RP11-38L15.8 | -0.72495294 | -0.76610895 |
| CYP2D6       | -0.76392889 | -0.54764712 |
| ADH4         | -0.62470979 | -0.762872   |
| SERPINC1     | -0.64231174 | -0.75788513 |
| GPER1        | -0.73874659 | -0.7562845  |
| FAM99B       | -0.75424502 | -0.63999416 |
| TSC2         | -0.75369796 | -0.6199147  |
| RP11-122K13  | -0.75356381 | -0.54125037 |
| PRAP1        | -0.75356381 | -0.54125041 |
| FUOM         | -0.75356381 | -0.54125046 |
| CHAD         | -0.74741586 | -0.49513365 |
| APOC2        | -0.7450738  | -0.54355247 |
| SLCO1B3      | -0.58591714 | -0.7442032  |
| ALDH1L1      | -0.59999491 | -0.74407132 |
| FMO3         | -0.49424232 | -0.74299001 |
| TM6SF2       | -0.73970533 | -0.62457193 |
| CAMSAP3      | -0.7391082  | -0.64069753 |
| RP11-403I13. | -0.53561344 | -0.73909758 |
| RP11-7F17.3  | -0.73628466 | -0.7269955  |
| RP11-830F9.5 | -0.7359723  | -0.57756223 |
| RP11-119D9.  | -0.66797538 | -0.73584138 |
| ECHDC3       | -0.73574499 | -0.64695488 |
| GJB1         | -0.73271966 | -0.71216975 |
| GSTA7P       | -0.69554599 | -0.72836277 |
| C11orf95     | -0.66759182 | -0.72831986 |
| MTND4P20     | -0.53622291 | -0.72807145 |
| LINC01018    | -0.72663526 | -0.4670925  |
| CTD-2227E11  | -0.72581509 | -0.72646364 |
| HAGH         | -0.7241312  | -0.56129832 |
| RP11-372E1.  | -0.48838126 | -0.72382996 |
| RP11-706C16  | -0.72151361 | -0.67126525 |
| JAKMIP2      | -0.59190911 | -0.71988615 |
| AP006216.5   | -0.71728566 | -0.60883583 |
| HPX          | -0.53134133 | -0.71341157 |
| ALB          | -0.61593953 | -0.71214067 |
| RP5-881L22.6 | -0.71205592 | -0.62633386 |
| PLEK2        | -0.58279018 | -0.71204221 |
| HGFAC        | -0.51325387 | -0.71165281 |
| ASB13        | -0.70086639 | -0.71154238 |
| GSTA1        | -0.71032899 | -0.64856362 |
| DGAT2        | -0.70679534 | -0.70974109 |
| NAT1         | -0.70961995 | -0.68535333 |
| RP1-152L7.5  | -0.60024854 | -0.7088288  |
| PLGLA        | -0.52861767 | -0.70862097 |

Table S3

|             |             |             |
|-------------|-------------|-------------|
| CBLN4       | -0.68430856 | -0.70843115 |
| AASS        | -0.56644207 | -0.70571741 |
| CYP4A11     | -0.705453   | -0.56334321 |
| MIR5589     | -0.53586591 | -0.70311148 |
| GALK1       | -0.6524941  | -0.70208265 |
| RP11-260M19 | -0.7011436  | -0.6485646  |
| AC005077.7  | -0.46807058 | -0.7006907  |
| EFNA2       | -0.49300466 | -0.69998303 |
| LYNX1       | -0.69971324 | -0.67462418 |
| SPSB3       | -0.69903937 | -0.46642679 |
| KCNMA1      | -0.55430532 | -0.69530983 |
| C10orf11    | -0.29734433 | -0.69480888 |
| RP11-659E9. | -0.66184955 | -0.69454529 |
| CECR2       | -0.54792984 | -0.69282446 |
| ADRA1A      | -0.4610272  | -0.68963291 |
| APOA5       | -0.68897857 | -0.46835311 |
| IGF2        | -0.68669975 | -0.61636773 |
| INS-IGF2    | -0.68669973 | -0.61636774 |
| AADAT       | -0.50497899 | -0.68563358 |
| CTD-2587M2  | -0.68322033 | -0.65519024 |
| SLC10A1     | -0.68208719 | -0.60260581 |
| TMPRSS6     | -0.67892758 | -0.46227989 |
| CTC-575D19. | -0.50301008 | -0.67783699 |
| SCP2        | -0.54729091 | -0.67775912 |
| NR1I2       | -0.67700905 | -0.62030923 |
| ABAT        | -0.33331643 | -0.67659891 |
| GS1-124K5.1 | -0.6751906  | -0.64925827 |
| ECHDC2      | -0.54473282 | -0.67350042 |
| PON3        | -0.58047417 | -0.6721999  |
| HAO2        | -0.58929896 | -0.6716787  |
| SLC22A7     | -0.66730949 | -0.51135093 |
| SLC9A3R2    | -0.66600375 | -0.49863254 |
| GRHPR       | -0.6657719  | -0.47558544 |
| SLC25A47    | -0.66548534 | -0.44343802 |
| CFHR5       | -0.39484139 | -0.66518336 |
| PLG         | -0.52855394 | -0.66518177 |
| AZGP1       | -0.62395669 | -0.66494299 |
| PCSK9       | -0.60364697 | -0.66493919 |
| NTHL1       | -0.66491983 | -0.49255849 |
| APOC1       | -0.66305233 | -0.48365484 |
| APOE        | -0.66305233 | -0.48365476 |
| AZGP1P1     | -0.66194605 | -0.54918409 |
| F2          | -0.46835274 | -0.66110168 |
| DFFB        | -0.61016315 | -0.66016317 |
| MAT1A       | -0.47979927 | -0.65852281 |
| EVPLL       | -0.54608141 | -0.6559937  |
| MFSD3       | -0.65447539 | -0.44261957 |
| GPT         | -0.65447539 | -0.44261959 |
| SMLR1       | -0.52661369 | -0.6541607  |

Table S3

|              |             |             |
|--------------|-------------|-------------|
| PPP1R1C      | -0.48262948 | -0.65398528 |
| CTD-2517M2   | -0.65335043 | -0.4442219  |
| SULT1A1      | -0.65307806 | -0.54881671 |
| ST3GAL6      | -0.29637856 | -0.6524712  |
| SLC25A34     | -0.65212305 | -0.54308214 |
| MGMT         | -0.46699718 | -0.65200609 |
| ZNF511       | -0.65139548 | -0.4622824  |
| TMEM105      | -0.55302581 | -0.65100671 |
| HSD17B10     | -0.65077375 | -0.54606299 |
| RP3-339A18.  | -0.65077365 | -0.54606314 |
| SERPINF2     | -0.61094679 | -0.65017548 |
| FBLN7        | -0.65001246 | -0.38974033 |
| SLC39A5      | -0.64976858 | -0.55007742 |
| SYAP1        | -0.4535541  | -0.64927048 |
| RP13-650J16  | -0.6478358  | -0.3982245  |
| DCXR         | -0.64783579 | -0.39822448 |
| TPCN2        | -0.64773178 | -0.59461018 |
| PON1         | -0.59295438 | -0.64760568 |
| FAHD1        | -0.64633858 | -0.48634266 |
| FOXP2        | -0.33860001 | -0.64592897 |
| AZGP1P2      | -0.64485418 | -0.53287999 |
| TRABD2B      | -0.47722253 | -0.64321508 |
| PROX1-AS1    | -0.33832987 | -0.64270413 |
| C2orf72      | -0.5594156  | -0.6418142  |
| GNA11        | -0.57685342 | -0.64092872 |
| HAAO         | -0.6387934  | -0.45134397 |
| APOH         | -0.43648694 | -0.63846139 |
| THAP3        | -0.50147004 | -0.63719817 |
| SLC38A3      | -0.63662377 | -0.36577035 |
| AP006285.7   | -0.63650096 | -0.51105337 |
| RP11-223I10. | -0.57321173 | -0.6353221  |
| MSRB1        | -0.4839175  | -0.63462722 |
| SEMA4G       | -0.63420912 | -0.46527582 |
| UGT2B7       | -0.34735527 | -0.63379328 |
| COL18A1      | -0.633764   | -0.48613968 |
| TTR          | -0.60446147 | -0.63364811 |
| GC           | -0.29478957 | -0.6335266  |
| SLC6A12      | -0.6333656  | -0.45859746 |
| MT1X         | -0.44253318 | -0.63240484 |
| HPGD         | -0.4128829  | -0.63133765 |
| SKP2         | -0.35220983 | -0.62910207 |
| SULT1E1      | -0.40411073 | -0.62873206 |
| GOT2         | -0.62852963 | -0.53663294 |
| PROX1        | -0.35402263 | -0.62818618 |
| LCAT         | -0.62813838 | -0.51929613 |
| TP53I13      | -0.62703429 | -0.37204121 |
| CES3         | -0.58736479 | -0.626415   |
| KLF15        | -0.62635639 | -0.45928035 |
| BHMT         | -0.62591419 | -0.55159714 |

Table S3

|             |             |             |
|-------------|-------------|-------------|
| HSD17B6     | -0.52637047 | -0.62578294 |
| CYP2C8      | -0.45076188 | -0.62565461 |
| MASP2       | -0.62540411 | -0.45429021 |
| FTCD        | -0.62522253 | -0.38500405 |
| ABCC6P1     | -0.62509976 | -0.38452141 |
| TDO2        | -0.35564566 | -0.62458298 |
| SEPP1       | -0.39355054 | -0.62306905 |
| PSAT1       | -0.54753136 | -0.62300561 |
| AC016768.1  | -0.38420885 | -0.62272919 |
| ESRP2       | -0.6218496  | -0.48248855 |
| REXO1       | -0.56277739 | -0.62150134 |
| BCKDHB      | -0.62123979 | -0.4713873  |
| WNK3        | -0.62106763 | -0.34570911 |
| GYS2        | -0.41303876 | -0.62103511 |
| SULT1A2     | -0.62028062 | -0.48991151 |
| TOMM40      | -0.61989376 | -0.43165585 |
| GRB14       | -0.4458305  | -0.61988769 |
| ALDH7A1     | -0.46238695 | -0.61876846 |
| SEC14L4     | -0.61755403 | -0.41089817 |
| MLXIPL      | -0.6175478  | -0.54816044 |
| RAC3        | -0.61724767 | -0.35175161 |
| NUGGC       | -0.44890558 | -0.61652604 |
| F7          | -0.61648164 | -0.50799424 |
| RTP3        | -0.61626652 | -0.54756019 |
| CES1        | -0.61619799 | -0.41731858 |
| RFNG        | -0.61435967 | -0.50350499 |
| GPS1        | -0.61435961 | -0.50350491 |
| PPP1R16A    | -0.61345434 | -0.41105207 |
| TTBK1       | -0.60395821 | -0.61324208 |
| KLHDC10     | -0.61303155 | -0.60010566 |
| MYO15A      | -0.61245206 | -0.50874414 |
| RP5-834N19. | -0.51365436 | -0.61200935 |
| GAMT        | -0.61187939 | -0.36664478 |
| IYD         | -0.50358548 | -0.61132638 |
| MPST        | -0.6108748  | -0.54581605 |
| RP11-418J17 | -0.57473442 | -0.61052084 |
| CPN2        | -0.48459523 | -0.6103631  |
| PSMB7       | -0.40820418 | -0.61021229 |
| PPARA       | -0.6100155  | -0.52676745 |
| SPP2        | -0.56862656 | -0.60999811 |
| HFE2        | -0.46933974 | -0.60889644 |
| DMRTA1      | -0.51210504 | -0.60876512 |
| SORD        | -0.58079901 | -0.60821283 |
| FAM99A      | -0.608083   | -0.52127727 |
| XAB2        | -0.60789085 | -0.53251592 |
| GPRC5C      | -0.60748968 | -0.58039232 |
| PKD2        | -0.44771588 | -0.6074226  |
| ACOT6       | -0.60734884 | -0.41927042 |
| COX10-AS1   | -0.53103449 | -0.60731393 |

Table S3

|              |             |             |
|--------------|-------------|-------------|
| ST18         | -0.40357472 | -0.6066086  |
| NRBP2        | -0.6050793  | -0.55679106 |
| ABCC11       | -0.40158633 | -0.60456873 |
| PGRMC1       | -0.47252679 | -0.60425638 |
| PLIN4        | -0.60248646 | -0.60349035 |
| FES          | -0.42565685 | -0.60271729 |
| SLC45A3      | -0.38899675 | -0.60209738 |
| TMEM176A     | -0.46405227 | -0.60127865 |
| MBL2         | -0.53147691 | -0.60088917 |
| SLC16A2      | -0.33244141 | -0.60064312 |
| ADH1B        | -0.43132286 | -0.60005989 |
| NOS1AP       | -0.40807855 | -0.59979899 |
| SLC44A1      | -0.36490248 | -0.59952296 |
| TDGF1        | -0.41829492 | -0.59947195 |
| ACSM5        | -0.4846508  | -0.59940731 |
| DHTKD1       | -0.59913906 | -0.4510699  |
| ANPEP        | -0.39222731 | -0.59797437 |
| AP000695.6   | -0.59793891 | -0.58609996 |
| TMEM110-MU   | -0.48091903 | -0.59739318 |
| MIR3646      | -0.5959499  | -0.52518315 |
| NUDC         | -0.59416921 | -0.54419999 |
| TMEM176B     | -0.45821951 | -0.59377894 |
| DGAT1        | -0.59367306 | -0.38374643 |
| CNTLN        | -0.38339951 | -0.59294026 |
| ASGR2        | -0.57713067 | -0.59260218 |
| NLRP14       | -0.47829452 | -0.59257624 |
| RAVER1       | -0.58965445 | -0.56794636 |
| PLIN5        | -0.43688193 | -0.58939783 |
| RAPSN        | -0.44810686 | -0.58914135 |
| KHK          | -0.58850678 | -0.47178375 |
| NBPF13P      | -0.52308524 | -0.58820299 |
| CEACAM22P    | -0.58759132 | -0.5714708  |
| SLC43A1      | -0.58716714 | -0.48673092 |
| HNF1A        | -0.58703441 | -0.43191851 |
| CMYA5        | -0.46678244 | -0.586006   |
| PQLC1        | -0.51128552 | -0.58518879 |
| LRRC3        | -0.58506819 | -0.33908631 |
| LRRC3-AS1    | -0.58506818 | -0.33908633 |
| CHID1        | -0.52113529 | -0.58487534 |
| KLKB1        | -0.49699917 | -0.58477479 |
| CTB-50L17.14 | -0.42648991 | -0.58312503 |
| HSD17B14     | -0.58311868 | -0.52414515 |
| MGST1        | -0.44586517 | -0.58266921 |
| ARID3C       | -0.58266304 | -0.51941336 |
| CAT          | -0.58201229 | -0.48705715 |
| RP11-252E2.  | -0.58143053 | -0.56129588 |
| SLC22A10     | -0.53408945 | -0.58121634 |
| ACOX2        | -0.5805449  | -0.51146067 |
| RP11-696N14  | -0.44797812 | -0.58037082 |

Table S3

|             |             |             |
|-------------|-------------|-------------|
| GLYAT       | -0.41431923 | -0.57973952 |
| NR2F6       | -0.5793919  | -0.40638654 |
| RNF128      | -0.36331509 | -0.57910884 |
| C1orf115    | -0.49538995 | -0.57895323 |
| SNAPC4      | -0.57830369 | -0.36224395 |
| SNED1       | -0.57740037 | -0.40034854 |
| PNPLA3      | -0.5771948  | -0.50713825 |
| SCG5        | -0.50820222 | -0.57715739 |
| NIT2        | -0.52382134 | -0.57681417 |
| TST         | -0.57610113 | -0.47748132 |
| GGACT       | -0.29750282 | -0.57565388 |
| GSTZ1       | -0.57416671 | -0.49594461 |
| MRPL43      | -0.57393552 | -0.38562571 |
| SLC27A5     | -0.57384955 | -0.36274605 |
| BCAT2       | -0.57362287 | -0.4821496  |
| POLE        | -0.5734815  | -0.36457824 |
| SERPINA4    | -0.45149394 | -0.57326362 |
| ABCG8       | -0.57311013 | -0.43992538 |
| TEF         | -0.57245391 | -0.41824675 |
| LBX2        | -0.54741405 | -0.571731   |
| LBX2-AS1    | -0.54741406 | -0.57173079 |
| RP11-523H20 | -0.54741405 | -0.57173062 |
| BPHL        | -0.37664424 | -0.57086038 |
| PACSIN3     | -0.51016493 | -0.569775   |
| ASPG        | -0.5695377  | -0.44994196 |
| SERPINA5    | -0.37963361 | -0.56949765 |
| CA14        | -0.56920372 | -0.47864338 |
| GGH         | -0.30389191 | -0.56847041 |
| AKR1D1      | -0.46639569 | -0.56766263 |
| HNF1A-AS1   | -0.56746377 | -0.42809642 |
| PKD1        | -0.56703768 | -0.35638666 |
| C8orf82     | -0.56627989 | -0.3824422  |
| TTC36       | -0.55970467 | -0.56589728 |
| CLDN14      | -0.51014848 | -0.5653727  |
| PROC        | -0.46263394 | -0.56342543 |
| HNF4A       | -0.56170072 | -0.52228426 |
| KCTD21-AS1  | -0.37965635 | -0.56160309 |
| NDUFA6-AS1  | -0.56092034 | -0.38097628 |
| IVD         | -0.56033217 | -0.43510994 |
| SLC25A10    | -0.55948616 | -0.36553108 |
| DNAJC12     | -0.40517798 | -0.55921823 |
| ITIH4       | -0.48430675 | -0.55896096 |
| RP5-966M1.6 | -0.48430678 | -0.5589609  |
| CBS         | -0.55818014 | -0.49263627 |
| VIL1        | -0.55804691 | -0.50261453 |
| FTCDNL1     | -0.55759976 | -0.42851501 |
| TMEM25      | -0.53650468 | -0.55661602 |
| ALAD        | -0.55652649 | -0.4414033  |
| POMT2       | -0.55575725 | -0.47829184 |



Table S3

|              |             |             |
|--------------|-------------|-------------|
| SLC19A1      | -0.55514766 | -0.39980198 |
| AK4          | -0.37776613 | -0.55510821 |
| MOGAT1       | -0.46931272 | -0.55422142 |
| PCYT2        | -0.55361709 | -0.37385382 |
| RP4-758J18.2 | -0.55342691 | -0.33293506 |
| CCNL2        | -0.5534269  | -0.33293503 |
| QDPR         | -0.41312051 | -0.55337415 |
| GNAO1        | -0.40709817 | -0.55335288 |
| SAT2         | -0.55328098 | -0.32899268 |
| NUDT16       | -0.49638324 | -0.55146716 |
| ABHD15       | -0.55087095 | -0.2706481  |
| RP3-402G11.2 | -0.55049535 | -0.42967261 |
| SELO         | -0.55049531 | -0.42967262 |
| TMEM110      | -0.4523131  | -0.54941938 |
| AMBP         | -0.5332563  | -0.54935059 |
| PHGDH        | -0.39295342 | -0.54867972 |
| ALKBH2       | -0.53423372 | -0.54812573 |
| XYLB         | -0.54782416 | -0.46845163 |
| TTC31        | -0.54772171 | -0.40042391 |
| C1R          | -0.36476152 | -0.54761051 |
| STEAP3       | -0.37738984 | -0.54733639 |
| PMM1         | -0.54627888 | -0.28253201 |
| C16orf13     | -0.54570672 | -0.32688719 |
| ITIH1        | -0.44793049 | -0.54564737 |
| SHMT2        | -0.54552397 | -0.52298954 |
| SH3PXD2A     | -0.44187639 | -0.54539559 |
| ASL          | -0.54456235 | -0.52231389 |
| NDUFS7       | -0.54417121 | -0.29338413 |
| NAPEPLD      | -0.42271619 | -0.54372659 |
| TCEA3        | -0.45619391 | -0.54341951 |
| SUGP1        | -0.54098686 | -0.44638745 |
| VTN          | -0.54075469 | -0.443821   |
| SHANK3       | -0.54064551 | -0.39602555 |
| ECHS1        | -0.54056713 | -0.41448155 |
| MFAP3L       | -0.30652926 | -0.53937362 |
| MRPL23       | -0.53932617 | -0.50045197 |
| MIR126       | -0.53192407 | -0.53928628 |
| AGXT2        | -0.32841234 | -0.53910873 |
| SLC25A42     | -0.53807907 | -0.36450899 |
| MARC1        | -0.38312721 | -0.53739454 |
| ELP3         | -0.36883554 | -0.53613072 |
| DAB1         | -0.32375416 | -0.53608108 |
| TMEM37       | -0.3196043  | -0.53540935 |
| GULOP        | -0.53516416 | -0.40178378 |
| ASPSCR1      | -0.53480527 | -0.32653753 |
| GNE          | -0.45806797 | -0.53442947 |
| SLC25A18     | -0.50350814 | -0.53424868 |
| SLC46A1      | -0.53407199 | -0.42455711 |
| SFXN5        | -0.496014   | -0.53339116 |

Table S3

|              |             |             |
|--------------|-------------|-------------|
| C3           | -0.32496828 | -0.53334588 |
| ICAM3        | -0.5330691  | -0.47745957 |
| TTPAL        | -0.53285799 | -0.4357361  |
| CTNS         | -0.53240924 | -0.37648291 |
| PRKAG2-AS1   | -0.5310375  | -0.31160358 |
| ABCG5        | -0.5300833  | -0.41424045 |
| PROZ         | -0.52983523 | -0.46086358 |
| SUOX         | -0.47224945 | -0.52936307 |
| FAM53A       | -0.52900374 | -0.37347314 |
| SPTBN2       | -0.41482506 | -0.52846757 |
| CASC10       | -0.46069097 | -0.52801376 |
| LCN12        | -0.52755957 | -0.2416872  |
| C8G          | -0.52755957 | -0.2416872  |
| SIGMAR1      | -0.52753124 | -0.29635608 |
| MLYCD        | -0.52746589 | -0.40467836 |
| CPPED1       | -0.45585123 | -0.52692497 |
| APOF         | -0.39252114 | -0.52685065 |
| ABCC2        | -0.33069775 | -0.526547   |
| HPN          | -0.52571552 | -0.45549562 |
| PKLR         | -0.52544006 | -0.47379075 |
| RAD54L2      | -0.52459046 | -0.48270611 |
| RP5-875H18.1 | -0.52423609 | -0.39216451 |
| CMBL         | -0.50367322 | -0.52370941 |
| RP11-390F4.1 | -0.33177001 | -0.52181134 |
| SLC30A10     | -0.38143031 | -0.52019655 |
| ACADSB       | -0.35733082 | -0.51715283 |
| ITCH         | -0.36434796 | -0.51632268 |
| RP11-1151B1  | -0.39617577 | -0.51550649 |
| RP11-661A12  | -0.51475978 | -0.36138695 |
| SLC13A5      | -0.44023114 | -0.51468042 |
| TMEM220      | -0.44426325 | -0.51422255 |
| PRKAG2       | -0.51333418 | -0.37661849 |
| TADA1        | -0.51288083 | -0.42028579 |
| ASGR1        | -0.5127561  | -0.48431379 |
| DOLPP1       | -0.51267896 | -0.41169338 |
| FXYD1        | -0.51259674 | -0.34985605 |
| PCK2         | -0.51153711 | -0.38174507 |
| DHRS4        | -0.51151351 | -0.35312145 |
| PGLYRP2      | -0.51129907 | -0.43756266 |
| LPAL2        | -0.47613199 | -0.51093138 |
| AC142528.1   | -0.50993273 | -0.47855001 |
| AGPAT2       | -0.50987929 | -0.50145303 |
| PEBP1        | -0.50957342 | -0.36946543 |
| HIBADH       | -0.40473344 | -0.50932067 |
| CYP4F3       | -0.50927874 | -0.48591038 |
| RGS12        | -0.41474877 | -0.50878816 |
| TNFAIP8L1    | -0.50681237 | -0.31462028 |
| RP11-407B7.1 | -0.36462574 | -0.50655877 |
| DCTD         | -0.38206799 | -0.5062648  |

Table S3

|             |             |             |
|-------------|-------------|-------------|
| MRPS22      | -0.42399493 | -0.50613564 |
| DBT         | -0.35164339 | -0.50496922 |
| PAOX        | -0.50466519 | -0.27578744 |
| PAIP2B      | -0.50458813 | -0.43717477 |
| MPC1        | -0.32317742 | -0.50313087 |
| NDRG2       | -0.38817639 | -0.5029702  |
| PEMT        | -0.47849196 | -0.50282158 |
| ALDH8A1     | -0.30685945 | -0.50167267 |
| TSSC1       | -0.41604199 | -0.50166131 |
| AP001065.15 | -0.50121439 | -0.43630473 |
| TSPAN9      | -0.39052741 | -0.5010383  |
| FGFR4       | -0.50079069 | -0.40955859 |
| ZNF444      | -0.49924193 | -0.47143732 |
| LINC00094   | -0.49907735 | -0.34613862 |
| FAM73B      | -0.49864561 | -0.41579389 |
| TTPA        | -0.29893692 | -0.49838552 |
| CTD-2545H1. | -0.49794342 | -0.4922324  |
| TFR2        | -0.49737757 | -0.40044049 |
| FLCN        | -0.49727171 | -0.39699181 |
| ACAA1       | -0.49691562 | -0.40187225 |
| FURIN       | -0.38736648 | -0.49665955 |
| SALL1       | -0.32368911 | -0.49658827 |
| ZNF696      | -0.49657629 | -0.3440484  |
| RNF126      | -0.49601691 | -0.33194009 |
| AC004156.3  | -0.49601688 | -0.33194018 |
| POLR3H      | -0.49517761 | -0.31785751 |
| GHR         | -0.32229072 | -0.49490278 |
| ACP2        | -0.49474027 | -0.46615352 |
| ZNF497      | -0.49442209 | -0.39183096 |
| ZBTB48      | -0.49401346 | -0.2997022  |
| FAM20C      | -0.49390927 | -0.46207081 |
| NAT8        | -0.4935748  | -0.42309711 |
| HPD         | -0.49355526 | -0.42777177 |
| ADI1        | -0.49351634 | -0.42814468 |
| CTA-292E10. | -0.2790415  | -0.49296135 |
| SNHG8       | -0.30963332 | -0.49265941 |
| BNIP3       | -0.49251914 | -0.36536377 |
| ZNF517      | -0.4917722  | -0.46460047 |
| EHHADH      | -0.41997315 | -0.49164704 |
| RP11-449P15 | -0.49137643 | -0.43785462 |
| GET4        | -0.4913764  | -0.43785455 |
| TBC1D2      | -0.44369124 | -0.49087881 |
| SFXN1       | -0.45312962 | -0.49081025 |
| FBXW11P1    | -0.42475793 | -0.49075521 |
| TTC6        | -0.2733433  | -0.49007905 |
| GALT        | -0.48939574 | -0.32661027 |
| MRPL20      | -0.48889795 | -0.29298016 |
| RP11-513G11 | -0.32566644 | -0.48866387 |
| ZBTB45      | -0.48783977 | -0.30485582 |

Table S3

|             |             |             |
|-------------|-------------|-------------|
| EDC3        | -0.44603223 | -0.48753583 |
| AC009166.5  | -0.32444132 | -0.48751622 |
| PCBD1       | -0.48719245 | -0.39835197 |
| RP11-44M6.3 | -0.48716407 | -0.36623863 |
| LRRC37A5P   | -0.4311686  | -0.48715786 |
| OSGIN1      | -0.48661609 | -0.33313549 |
| DEPDC7      | -0.3491709  | -0.48657689 |
| TMEM82      | -0.48639705 | -0.40000723 |
| SLC26A1     | -0.48606527 | -0.39855654 |
| HSBP1L1     | -0.35304183 | -0.48601142 |
| THRB        | -0.29114288 | -0.48535447 |
| ENTPD5      | -0.35027874 | -0.48523689 |
| PKD1L2      | -0.46030085 | -0.48456053 |
| BDH1        | -0.48419263 | -0.33955255 |
| SLC25A20    | -0.48393904 | -0.34051564 |
| RDH16       | -0.48359387 | -0.4489049  |
| MYD88       | -0.48334123 | -0.39550524 |
| MPLKIP      | -0.48304731 | -0.40127274 |
| FBP1        | -0.48272264 | -0.35558511 |
| SOWAHB      | -0.46464072 | -0.48157392 |
| FUBP3       | -0.48155248 | -0.40610461 |
| CYP27A1     | -0.41327242 | -0.48118186 |
| IL11RA      | -0.4798205  | -0.3337762  |
| SLC27A2     | -0.44706769 | -0.47901059 |
| ZNF385B     | -0.33023531 | -0.47848627 |
| DEAF1       | -0.47796184 | -0.36825415 |
| POLR2F      | -0.47774132 | -0.33296713 |
| MMACHC      | -0.47712778 | -0.41091257 |
| RP11-344P13 | -0.39852927 | -0.47679292 |
| IDUA        | -0.47671009 | -0.39321773 |
| HDHD3       | -0.44181024 | -0.47659129 |
| FABP1       | -0.30753758 | -0.47627108 |
| SCCPDH      | -0.45745009 | -0.47546018 |
| EPHX2       | -0.47481538 | -0.43637706 |
| TTC38       | -0.474034   | -0.28784079 |
| PCDH1       | -0.27460496 | -0.47387188 |
| C19orf66    | -0.47381786 | -0.43815769 |
| CFB         | -0.35693341 | -0.47336005 |
| MTHFD1      | -0.46427643 | -0.47210587 |
| CYP8B1      | -0.32041968 | -0.47112259 |
| TRIM24      | -0.40642724 | -0.46963243 |
| FKBP8       | -0.46922264 | -0.43147395 |
| PEX6        | -0.46908041 | -0.33063488 |
| BTD         | -0.38310231 | -0.46782556 |
| SLC6A1      | -0.46749302 | -0.33398139 |
| RANBP1      | -0.46739615 | -0.34553256 |
| RP11-38G5.4 | -0.44114597 | -0.4670968  |
| TOLLIP      | -0.4670631  | -0.37155505 |
| LGI4        | -0.46690066 | -0.30048316 |

Table S3

|             |             |             |
|-------------|-------------|-------------|
| RP11-209K10 | -0.35233705 | -0.46683615 |
| OPLAH       | -0.44651345 | -0.46490928 |
| SGK2        | -0.39416895 | -0.46457315 |
| EI24        | -0.46454905 | -0.3812715  |
| CYP4F11     | -0.4083028  | -0.46418502 |
| WDR18       | -0.40553702 | -0.46347861 |
| TOLLIP-AS1  | -0.463264   | -0.37064645 |
| USP30       | -0.45958095 | -0.46283748 |
| ABCG2       | -0.45366629 | -0.46181431 |
| ACACB       | -0.35797062 | -0.46176925 |
| AHCY        | -0.4064863  | -0.46103644 |
| ABCC6       | -0.43846415 | -0.45989323 |
| GLS2        | -0.45963971 | -0.27880136 |
| AC019181.2  | -0.39783467 | -0.45961561 |
| ACVR1C      | -0.38045717 | -0.45891588 |
| F10         | -0.45882069 | -0.36950754 |
| ZKSCAN1     | -0.39867916 | -0.45840621 |
| ADCY1       | -0.45809579 | -0.37976781 |
| CHMP6       | -0.42696208 | -0.4575594  |
| RPL7AP6     | -0.35534184 | -0.4563226  |
| SEC14L2     | -0.43225002 | -0.45577579 |
| C7orf50     | -0.45567089 | -0.36783366 |
| FAH         | -0.36603446 | -0.45532692 |
| CLUH        | -0.45525342 | -0.26882068 |
| PPP6R2      | -0.45511075 | -0.25961048 |
| C1S         | -0.27588469 | -0.45447322 |
| FANCC       | -0.28011776 | -0.45402927 |
| SLC25A13    | -0.45387704 | -0.43150595 |
| RAPH1       | -0.31973935 | -0.45347927 |
| RNF215      | -0.45336741 | -0.45261625 |
| PAH         | -0.36803375 | -0.45335418 |
| GCSH        | -0.45281308 | -0.34995596 |
| LHPP        | -0.45207122 | -0.33877499 |
| TFDP2       | -0.45187246 | -0.39525617 |
| KDM8        | -0.39823294 | -0.45164846 |
| ACSF2       | -0.45161505 | -0.28630564 |
| RAB26       | -0.45154017 | -0.29370101 |
| SMOC1       | -0.40655165 | -0.45031917 |
| AL161668.5  | -0.4499014  | -0.32396975 |
| TPPP2       | -0.44990139 | -0.3239697  |
| IPO5        | -0.26741723 | -0.44948608 |
| ZC3H7B      | -0.44913537 | -0.3385584  |
| RP4-584D14. | -0.3750442  | -0.44912805 |
| RARRES2     | -0.3750443  | -0.44912805 |
| POLM        | -0.44893481 | -0.29853335 |
| RP11-713M15 | -0.38277897 | -0.44866948 |
| GPR146      | -0.44865796 | -0.38895443 |
| MOCS1       | -0.41773577 | -0.44792101 |
| SERPIND1    | -0.36698026 | -0.44786657 |

Table S3

|             |             |             |
|-------------|-------------|-------------|
| TACO1       | -0.44688164 | -0.37216997 |
| EPHX1       | -0.4466512  | -0.2775992  |
| SDC2        | -0.3101171  | -0.44600249 |
| RP11-45M22  | -0.44589988 | -0.30248336 |
| TOP1MT      | -0.39726686 | -0.44579036 |
| FAAH        | -0.44572098 | -0.40437451 |
| SLC22A1     | -0.35592978 | -0.44505431 |
| CTD-2619J13 | -0.44504645 | -0.33025985 |
| PUF60       | -0.44404391 | -0.29095008 |
| GLYCTK      | -0.44377755 | -0.35026885 |
| ARFGAP2     | -0.44372545 | -0.35288168 |
| PXMP2       | -0.4433802  | -0.24999398 |
| RAB40C      | -0.44330146 | -0.31355658 |
| PPL         | -0.4315543  | -0.44327275 |
| ESD         | -0.39666646 | -0.44284912 |
| IQGAP2      | -0.32689737 | -0.44264569 |
| DECR2       | -0.3407892  | -0.44198449 |
| ARMC6       | -0.44171579 | -0.38459195 |
| POLE2       | -0.43139487 | -0.44093522 |
| CDO1        | -0.44002295 | -0.33446279 |
| ITIH3       | -0.34223843 | -0.43953042 |
| SP5         | -0.43825549 | -0.42995769 |
| MAL2        | -0.32726125 | -0.43704003 |
| SMARCA1     | -0.29755465 | -0.43694811 |
| AP1M1       | -0.42285109 | -0.43687256 |
| SH2D3A      | -0.39439644 | -0.43681467 |
| CLSTN3      | -0.35954896 | -0.43629611 |
| RP11-736K20 | -0.35310608 | -0.43597212 |
| MAOB        | -0.35851329 | -0.43468652 |
| ACSM3       | -0.40360969 | -0.43359854 |
| PITPNM2     | -0.43183173 | -0.40867964 |
| ALDH6A1     | -0.43183011 | -0.35096677 |
| EPB41L4B    | -0.43182827 | -0.32919962 |
| SCLY        | -0.40008884 | -0.43091631 |
| OAF         | -0.33562809 | -0.43048654 |
| ALDH4A1     | -0.28716605 | -0.43042383 |
| ARRDC1      | -0.43038866 | -0.31724026 |
| KCTD21      | -0.33341511 | -0.43004666 |
| MTSS1       | -0.33017069 | -0.42971923 |
| RP11-273B20 | -0.42903237 | -0.38342987 |
| RBP5        | -0.42903235 | -0.38342977 |
| AGL         | -0.30940841 | -0.42726395 |
| AKT2        | -0.42725154 | -0.30639023 |
| DHRS1       | -0.31698678 | -0.42714246 |
| SS18L1      | -0.29773655 | -0.42702242 |
| LDHD        | -0.42515427 | -0.42699012 |
| CNGA1       | -0.4261871  | -0.37338182 |
| CYB5A       | -0.30128304 | -0.42584528 |
| GPD1        | -0.42512576 | -0.33581025 |

Table S3

|              |             |             |
|--------------|-------------|-------------|
| CRLS1        | -0.38554414 | -0.42500853 |
| EEF1D        | -0.42455967 | -0.27087658 |
| RNF43        | -0.33079245 | -0.42327577 |
| SND1         | -0.41353442 | -0.42320194 |
| STARD10      | -0.42288169 | -0.30011581 |
| UNC119B      | -0.2635271  | -0.42255029 |
| CYP4F2       | -0.36909994 | -0.42188912 |
| RAPGEFL1     | -0.42174714 | -0.38579213 |
| CCS          | -0.42145656 | -0.35268149 |
| C1RL         | -0.28282706 | -0.42072201 |
| RABEPK       | -0.25830292 | -0.42060896 |
| SLC25A1      | -0.42051755 | -0.29538267 |
| XRCC5        | -0.41252298 | -0.42007243 |
| RTTN         | -0.27426122 | -0.42003928 |
| AC091729.9   | -0.41998922 | -0.30812968 |
| ZFAND2A      | -0.41998921 | -0.30812963 |
| FAM50B       | -0.24568531 | -0.41974922 |
| ZCCHC24      | -0.3000804  | -0.41900341 |
| KIAA1161     | -0.41780651 | -0.31125164 |
| ORAI3        | -0.41675126 | -0.2260546  |
| RTKN         | -0.37891422 | -0.41651837 |
| ARVCF        | -0.4158601  | -0.33280454 |
| RANBP10      | -0.41582233 | -0.35862083 |
| GGCX         | -0.41520765 | -0.4005541  |
| RAI14        | -0.28978227 | -0.41414754 |
| SEC24B       | -0.41410303 | -0.40612039 |
| DHRS4-AS1    | -0.41357542 | -0.28741066 |
| HGD          | -0.41354462 | -0.39801706 |
| AK2          | -0.33886441 | -0.41331637 |
| COMT         | -0.41291208 | -0.40673668 |
| RP11-390F4.1 | -0.4128031  | -0.37317276 |
| IGSF8        | -0.41194622 | -0.35958714 |
| CNNM3        | -0.40992921 | -0.27139126 |
| CDA          | -0.36907875 | -0.40982203 |
| NIPSNAP1     | -0.40921439 | -0.27157182 |
| MARC2        | -0.29767051 | -0.40886411 |
| RMDN2        | -0.33596855 | -0.40884522 |
| CDHR3        | -0.31811406 | -0.40828798 |
| CDKN2AIPNL   | -0.35830649 | -0.40812345 |
| HMGCS2       | -0.35195098 | -0.40794621 |
| RUNDC3B      | -0.40754375 | -0.36411206 |
| PAQR9        | -0.40581813 | -0.34342162 |
| PGM1         | -0.29171942 | -0.40564516 |
| CLU          | -0.33992741 | -0.40451622 |
| METTL7B      | -0.40440387 | -0.36579102 |
| OGFR-AS1     | -0.40303212 | -0.28290761 |
| OGFR         | -0.40303194 | -0.28290762 |
| CNP          | -0.40300593 | -0.27696223 |
| ALDH2        | -0.34376265 | -0.40235433 |

Table S3

|              |             |             |
|--------------|-------------|-------------|
| SMARCD2      | -0.40191315 | -0.26016194 |
| SLC47A1      | -0.38887493 | -0.40078725 |
| MYH14        | -0.39185752 | -0.40078648 |
| SNTB1        | -0.29749725 | -0.39967707 |
| ZNF3         | -0.39956344 | -0.29301597 |
| PHYHD1       | -0.36517495 | -0.39823507 |
| CSAD         | -0.39743692 | -0.31170411 |
| ACSL1        | -0.38375538 | -0.39712276 |
| CLDN15       | -0.2855084  | -0.39595715 |
| ZER1         | -0.39454397 | -0.33872364 |
| RP11-384L8.1 | -0.39319765 | -0.3070985  |
| CMTM8        | -0.39319761 | -0.30709859 |
| LRP1         | -0.29833253 | -0.39301776 |
| PKP2         | -0.34439876 | -0.3926357  |
| SLC25A27     | -0.33965267 | -0.39108688 |
| CYP39A1      | -0.33965247 | -0.39108607 |
| RNF220       | -0.36030039 | -0.39104117 |
| RP5-1033H22  | -0.30503081 | -0.39050236 |
| ECI2         | -0.39036176 | -0.30879026 |
| SIRT7        | -0.38972422 | -0.28326125 |
| FZD4         | -0.34499709 | -0.38933786 |
| SUV39H1      | -0.36971855 | -0.38888921 |
| TCF7L1       | -0.26986858 | -0.38839527 |
| CHST13       | -0.38814415 | -0.32402455 |
| NFIC         | -0.38801358 | -0.31715258 |
| PC           | -0.2713548  | -0.38793794 |
| SESN2        | -0.3709953  | -0.38782191 |
| AFMID        | -0.38774641 | -0.30584992 |
| NR0B2        | -0.36539925 | -0.38774243 |
| SLC12A7      | -0.38663084 | -0.27527243 |
| CAPN5        | -0.34570202 | -0.38577686 |
| THRB-AS1     | -0.34943077 | -0.38575153 |
| ABHD6        | -0.34257166 | -0.38522473 |
| ATXN7L1      | -0.26845327 | -0.38521028 |
| TALDO1       | -0.38502538 | -0.30703897 |
| DGCR8        | -0.38471087 | -0.3773287  |
| ATP5SL       | -0.31559414 | -0.38440531 |
| ZBTB42       | -0.38427243 | -0.2922977  |
| AKT1         | -0.38427243 | -0.29229771 |
| PANX2        | -0.38404028 | -0.36173835 |
| MTFR1        | -0.38367093 | -0.24254236 |
| SHMT1        | -0.38348468 | -0.35373178 |
| GCH1         | -0.2959687  | -0.38317213 |
| F12          | -0.38308371 | -0.27951505 |
| MTM1         | -0.38247333 | -0.29781583 |
| NME4         | -0.32377865 | -0.38216429 |
| SLCO2B1      | -0.38122455 | -0.26391129 |
| RASSF7       | -0.3811343  | -0.293724   |
| RP11-655M14  | -0.38109626 | -0.26735602 |



Table S3

|             |             |             |
|-------------|-------------|-------------|
| TBX10       | -0.38109598 | -0.26735594 |
| NUDT8       | -0.38109581 | -0.2673559  |
| PSMA7       | -0.38098092 | -0.29845841 |
| TRMT2A      | -0.38057839 | -0.22895339 |
| EEFSEC      | -0.34037015 | -0.38025914 |
| HLF         | -0.32957238 | -0.38009922 |
| PEX16       | -0.37993452 | -0.33492077 |
| PARP10      | -0.37981547 | -0.21387565 |
| RP11-134G8. | -0.27602285 | -0.37863625 |
| GRTP1       | -0.37814196 | -0.36530467 |
| HDLBP       | -0.37797755 | -0.3024235  |
| MAVS        | -0.37731114 | -0.36557947 |
| EPN1        | -0.37682644 | -0.27167571 |
| IRF2BP1     | -0.37674375 | -0.32099143 |
| ASB3        | -0.31361875 | -0.37647766 |
| TMEM80      | -0.37570265 | -0.24624656 |
| C16orf70    | -0.37492915 | -0.31083243 |
| SLC35D1     | -0.37436408 | -0.27595108 |
| SCAP        | -0.37369073 | -0.28496227 |
| MDN1        | -0.3562244  | -0.3736243  |
| ADCK3       | -0.29812925 | -0.37307645 |
| HSD11B2     | -0.3726025  | -0.31254558 |
| PHYH        | -0.3720753  | -0.33485628 |
| MMP15       | -0.35668513 | -0.37172165 |
| HOGA1       | -0.31742346 | -0.37107901 |
| RHCE        | -0.37080779 | -0.30171794 |
| ARL6IP4     | -0.37076139 | -0.28891513 |
| AQP3        | -0.32343107 | -0.36985801 |
| LRR1        | -0.3287904  | -0.36848651 |
| SETD1A      | -0.36744264 | -0.23242592 |
| TMEM57      | -0.3357718  | -0.36739329 |
| EPS8L2      | -0.36492322 | -0.22369652 |
| AP000355.2  | -0.36480429 | -0.31196501 |
| GPAM        | -0.36443184 | -0.34811237 |
| FOXA3       | -0.36375897 | -0.29284569 |
| PIPOX       | -0.36276665 | -0.28074058 |
| EPHB4       | -0.33746387 | -0.36213718 |
| TMEM192     | -0.27675938 | -0.36162899 |
| ANG         | -0.25749011 | -0.36109385 |
| SMPDL3A     | -0.25931705 | -0.36022303 |
| NT5DC3      | -0.26949837 | -0.35751769 |
| WDR81       | -0.35673733 | -0.25774597 |
| RAP2C       | -0.35660216 | -0.24521162 |
| RP11-350G8. | -0.3543378  | -0.35485534 |
| EPB41L5     | -0.35472404 | -0.2812191  |
| CERS2       | -0.26745357 | -0.35404273 |
| GTF2IRD1    | -0.35349659 | -0.33576831 |
| PEX19       | -0.35337264 | -0.34915125 |
| AKAP1       | -0.35263918 | -0.29265316 |

Table S3

|            |             |             |
|------------|-------------|-------------|
| SH2D4A     | -0.25490705 | -0.35212954 |
| NR1H3      | -0.35210006 | -0.27146195 |
| PDIK1L     | -0.35204896 | -0.2829924  |
| ANXA9      | -0.26745198 | -0.35124338 |
| PFKFB1     | -0.33473836 | -0.35099402 |
| KANK2      | -0.35036754 | -0.3319646  |
| SHH        | -0.32551636 | -0.35032606 |
| TMEM101    | -0.33732052 | -0.34983763 |
| RXRA       | -0.34948675 | -0.28767448 |
| HPCAL1     | -0.28039765 | -0.34899215 |
| C1RL-AS1   | -0.34870299 | -0.3393696  |
| KIF1C      | -0.34811672 | -0.23372311 |
| IDNK       | -0.2652978  | -0.34799289 |
| SIVA1      | -0.34716386 | -0.27226572 |
| ELK1       | -0.34650465 | -0.30471213 |
| IL6R       | -0.34129699 | -0.3463338  |
| NEIL1      | -0.34551526 | -0.32270888 |
| SERPINF1   | -0.34534084 | -0.33522948 |
| FCGRT      | -0.34444097 | -0.27204935 |
| AGFG2      | -0.34421296 | -0.29824866 |
| MUM1       | -0.34369254 | -0.32853246 |
| ABHD14A    | -0.34363545 | -0.23778997 |
| CLASRP     | -0.34316616 | -0.25338292 |
| MLX        | -0.34239925 | -0.32670861 |
| ACY1       | -0.34232231 | -0.247427   |
| STARD5     | -0.3419298  | -0.31524065 |
| FZD5       | -0.25822211 | -0.3409676  |
| DCAF8      | -0.27681872 | -0.339734   |
| ZNF408     | -0.26236338 | -0.33957453 |
| ALG3       | -0.3389394  | -0.32429392 |
| WIZ        | -0.3386708  | -0.23583346 |
| BAIAP2L1   | -0.26230457 | -0.33833424 |
| CTIF       | -0.32081451 | -0.33504599 |
| MACROD1    | -0.33385226 | -0.31944701 |
| WWC2-AS2   | -0.22097621 | -0.3336651  |
| COASY      | -0.33200618 | -0.31079482 |
| GLTPD2     | -0.33175708 | -0.27314765 |
| SEPHS2     | -0.27031363 | -0.3309181  |
| CES2       | -0.32990787 | -0.24570301 |
| FAM96B     | -0.32990787 | -0.24570233 |
| SDC1       | -0.26936324 | -0.32918957 |
| ZBTB39     | -0.32865224 | -0.32095137 |
| HDAC4      | -0.32840301 | -0.31694505 |
| SLC23A3    | -0.32771937 | -0.31415409 |
| XBP1       | -0.23846671 | -0.32709786 |
| C1orf220   | -0.32669137 | -0.27036106 |
| AP000253.1 | -0.32451248 | -0.29401886 |
| SLC35A3    | -0.29282936 | -0.32197216 |
| PPP1R26    | -0.3197786  | -0.29937873 |

Table S3

|             |             |             |
|-------------|-------------|-------------|
| PCTP        | -0.28365657 | -0.3197411  |
| RPS29       | -0.27154984 | -0.319368   |
| LTB4R2      | -0.27227953 | -0.31874686 |
| LTB4R       | -0.27227964 | -0.31874682 |
| KIAA2013    | -0.31837726 | -0.27583915 |
| SOD1        | -0.31814476 | -0.30820525 |
| NFYC        | -0.31229081 | -0.31672619 |
| DDI2        | -0.31641086 | -0.26843984 |
| PLA2G12B    | -0.31627894 | -0.27972574 |
| GSDMD       | -0.31549845 | -0.28092864 |
| C2          | -0.31260761 | -0.31434771 |
| ENKD1       | -0.31330502 | -0.30424951 |
| SUN2        | -0.31313228 | -0.23607547 |
| NUDT7       | -0.29642592 | -0.31281805 |
| CDON        | -0.31268371 | -0.26055483 |
| PEX11G      | -0.28673975 | -0.31256604 |
| UPB1        | -0.31139815 | -0.27512159 |
| COBL        | -0.31078456 | -0.27482485 |
| CTNNBIP1    | -0.31070486 | -0.26971012 |
| FAHD2A      | -0.2759954  | -0.31009587 |
| RAB40B      | -0.27038904 | -0.30958601 |
| NAPA        | -0.30932566 | -0.24080098 |
| ATP11C      | -0.30919624 | -0.29446512 |
| RBL2        | -0.30816824 | -0.25066095 |
| TPCN1       | -0.2009117  | -0.30642959 |
| KLHDC2      | -0.25686425 | -0.30247648 |
| MCEE        | -0.30024145 | -0.29215766 |
| SLC37A4     | -0.27316758 | -0.30000485 |
| VAMP8       | -0.29952151 | -0.27377672 |
| SLC25A44    | -0.29879377 | -0.29111812 |
| AKAP8       | -0.29806694 | -0.27827847 |
| ERMARD      | -0.29347634 | -0.29781332 |
| NELFB       | -0.29745893 | -0.24232981 |
| GRINA       | -0.29608637 | -0.22354455 |
| FAM35A      | -0.29523254 | -0.26738233 |
| RPL41       | -0.29310028 | -0.23916321 |
| ZNF490      | -0.24853924 | -0.29208614 |
| RP4-605O3.4 | -0.2906624  | -0.23350988 |
| COX14       | -0.2906624  | -0.2335097  |
| PMF1        | -0.22145396 | -0.28935479 |
| DNAJC25     | -0.2511999  | -0.28893162 |
| MTMR4       | -0.28516127 | -0.28642688 |
| CRTC2       | -0.25459398 | -0.28468128 |
| MCCC2       | -0.28210687 | -0.26364444 |
| ZNF787      | -0.27950087 | -0.21988141 |
| NPRL3       | -0.25928478 | -0.27888637 |
| RAB11FIP3   | -0.25547192 | -0.27748997 |
| PLXNB2      | -0.2757926  | -0.20709931 |
| RP11-1055B8 | -0.24897767 | -0.27466938 |

Table S3

|              |             |             |
|--------------|-------------|-------------|
| TPRN         | -0.25973517 | -0.27431518 |
| DBI          | -0.23974492 | -0.26067366 |
| ABCB6        | -0.25566735 | -0.25991797 |
| COG8         | -0.25807848 | -0.23033772 |
| SLC27A3      | -0.22292407 | -0.25561704 |
| RP11-1275H2  | -0.22375083 | -0.25122346 |
| RP11-1275H2  | -0.22375074 | -0.25122324 |
| ZNF689       | -0.24985306 | -0.24292946 |
| ATXN2        | -0.23871843 | -0.24756363 |
| OGG1         | -0.23787695 | -0.24669267 |
| ILK          | 0.210752398 | 0.215670346 |
| HIPK1        | 0.223081365 | 0.226794208 |
| AFTPH        | 0.229032561 | 0.231996349 |
| EZR          | 0.260488531 | 0.253964073 |
| ATM          | 0.254946522 | 0.262550247 |
| PLEKHA2      | 0.272810699 | 0.255425965 |
| DCHS1        | 0.274281788 | 0.241210805 |
| C15orf39     | 0.27940961  | 0.259068112 |
| GAL3ST4      | 0.244427108 | 0.281077987 |
| CASP8        | 0.288316856 | 0.288847658 |
| GGPS1        | 0.273509615 | 0.291437197 |
| PPARD        | 0.294225848 | 0.262095152 |
| PRPF38B      | 0.286121834 | 0.294350856 |
| HIVEP2       | 0.299790442 | 0.267480267 |
| DENND3       | 0.261596651 | 0.300499743 |
| ADD3         | 0.304301847 | 0.287508974 |
| RP11-356I2.4 | 0.275183333 | 0.304513623 |
| CTC1         | 0.271790024 | 0.305725514 |
| CREB1        | 0.303374547 | 0.306719613 |
| SSH2         | 0.307182373 | 0.285220039 |
| MAP3K1       | 0.267234767 | 0.3077578   |
| CACUL1       | 0.308578201 | 0.294135498 |
| FGD6         | 0.308960505 | 0.236207583 |
| OSTM1        | 0.29658056  | 0.311399251 |
| NABP1        | 0.310719368 | 0.312596991 |
| SLC43A2      | 0.280641011 | 0.312937726 |
| TUBA1C       | 0.291269259 | 0.313798513 |
| GNA13        | 0.315310025 | 0.261456232 |
| SPAG4        | 0.316600746 | 0.312743412 |
| PARP8        | 0.284753406 | 0.317782005 |
| SYT11        | 0.320922325 | 0.32197549  |
| GON4L        | 0.320922596 | 0.321975568 |
| RAB34        | 0.283690332 | 0.322605087 |
| ARL4A        | 0.323018    | 0.312977801 |
| LEPROTL1     | 0.325857506 | 0.279288314 |
| YWHAH        | 0.326257762 | 0.31678903  |
| HIVEP3       | 0.293661045 | 0.328636235 |
| CHMP4A       | 0.257146526 | 0.329633863 |
| ARPC5        | 0.32536411  | 0.33003866  |

Table S3

|             |             |             |
|-------------|-------------|-------------|
| ANXA11      | 0.330605932 | 0.201074502 |
| OGFRL1      | 0.334888571 | 0.30733855  |
| KLHL5       | 0.335375097 | 0.285531484 |
| IGF1R       | 0.340467509 | 0.328250579 |
| COL4A2      | 0.342154233 | 0.259035993 |
| PAK1        | 0.342711696 | 0.326455729 |
| JUN         | 0.346821453 | 0.294065815 |
| MTMR11      | 0.347161352 | 0.285825824 |
| LINC00857   | 0.347869495 | 0.229366543 |
| PDCD4       | 0.266200027 | 0.352438561 |
| ANKRD53     | 0.313974487 | 0.3549392   |
| FHL3        | 0.343154803 | 0.355441214 |
| CD63        | 0.316787405 | 0.35658012  |
| F2R         | 0.356939871 | 0.352328927 |
| MAP3K8      | 0.357692867 | 0.273579837 |
| SERPINB9    | 0.319539442 | 0.359817902 |
| PRDM2       | 0.280549516 | 0.359942734 |
| PRKCH       | 0.361029683 | 0.277438536 |
| IFFO2       | 0.361269267 | 0.345816233 |
| ZNF160      | 0.359936416 | 0.36378827  |
| ZNF397      | 0.314890278 | 0.36584279  |
| TCP11L2     | 0.28389699  | 0.366840954 |
| ACER2       | 0.367829349 | 0.305360022 |
| U73166.2    | 0.368162641 | 0.329797112 |
| GPRIN3      | 0.350765868 | 0.36842184  |
| SERAC1      | 0.368499562 | 0.295069717 |
| RNF145      | 0.365827554 | 0.369032385 |
| SH3RF3      | 0.287075499 | 0.369541857 |
| CTD-2201E18 | 0.369954646 | 0.335611943 |
| SMURF2      | 0.309739652 | 0.372569024 |
| CD47        | 0.373919004 | 0.363151165 |
| MKL1        | 0.375310467 | 0.291027877 |
| MAPRE1      | 0.350819218 | 0.375570159 |
| BCL2        | 0.362056703 | 0.377629521 |
| ARHGEF2     | 0.280298502 | 0.378478042 |
| TSPYL1      | 0.37911655  | 0.275706593 |
| RALGDS      | 0.315885323 | 0.380451608 |
| USP37       | 0.381606158 | 0.340598244 |
| GNA12       | 0.383406533 | 0.290219814 |
| RUNX2       | 0.292060239 | 0.384022378 |
| IQGAP1      | 0.384183601 | 0.376788815 |
| CDC42EP3    | 0.384923345 | 0.37741779  |
| CCNG2       | 0.346783007 | 0.385429552 |
| PAFAH1B2    | 0.385863482 | 0.355677091 |
| DUSP5       | 0.37846408  | 0.386244743 |
| RNF24       | 0.387484918 | 0.297827827 |
| PLA2G4C     | 0.388682405 | 0.372187926 |
| ITGA6       | 0.284133756 | 0.389748497 |
| SLC12A2     | 0.391208096 | 0.363408594 |

Table S3

|             |             |             |
|-------------|-------------|-------------|
| GYPC        | 0.305133073 | 0.391662919 |
| IL2RA       | 0.395355832 | 0.328750423 |
| SLC25A12    | 0.395805336 | 0.237863791 |
| ZNF304      | 0.32302879  | 0.396134187 |
| RAP2B       | 0.374009129 | 0.397251669 |
| FAM129B     | 0.365404021 | 0.397450652 |
| CAPN2       | 0.384268563 | 0.39788697  |
| AAGAB       | 0.394117875 | 0.402878196 |
| KIAA1462    | 0.403469816 | 0.390227568 |
| SNN         | 0.292662109 | 0.403837746 |
| CTB-55O6.12 | 0.24814694  | 0.404945376 |
| MDFIC       | 0.404998532 | 0.311795078 |
| IGFBP7      | 0.378551077 | 0.405538443 |
| PLCD3       | 0.307300814 | 0.405696106 |
| NOD2        | 0.406365596 | 0.31642647  |
| STK17A      | 0.392601896 | 0.406428221 |
| POU6F1      | 0.382764162 | 0.407952433 |
| CEP135      | 0.408054151 | 0.341360251 |
| ZNF829      | 0.355170153 | 0.408118353 |
| AEN         | 0.384324073 | 0.408432424 |
| ZNF568      | 0.33969794  | 0.408521724 |
| TTC16       | 0.409480236 | 0.39201105  |
| IDS         | 0.375522944 | 0.409573421 |
| HSPG2       | 0.3918783   | 0.41001784  |
| ATP2B4      | 0.265743188 | 0.410072852 |
| HELB        | 0.410351914 | 0.404359624 |
| FAM49B      | 0.29091936  | 0.411063187 |
| AGO2        | 0.283941632 | 0.411168589 |
| SYNGAP1     | 0.286545128 | 0.411985442 |
| CDC42SE2    | 0.412402579 | 0.379245204 |
| LY6G5C      | 0.387559452 | 0.412565647 |
| SP110       | 0.351812513 | 0.412938598 |
| REL         | 0.413520475 | 0.272690619 |
| FAM228B     | 0.413555441 | 0.395111656 |
| LUZP1       | 0.413661188 | 0.324162097 |
| CD58        | 0.374650165 | 0.414597379 |
| TULP3       | 0.415365485 | 0.391756036 |
| JAG1        | 0.41536706  | 0.274330693 |
| ZNF292      | 0.416049087 | 0.302302737 |
| CTTNBP2NL   | 0.41729261  | 0.307937381 |
| CCNJ        | 0.367356823 | 0.417658253 |
| CCDC28B     | 0.340358001 | 0.419728287 |
| ZNF512      | 0.344947578 | 0.419986574 |
| BBS7        | 0.381288072 | 0.420247506 |
| HSPA12A     | 0.421194905 | 0.354604288 |
| PRICKLE2    | 0.422388397 | 0.269549905 |
| RAVER2      | 0.424645489 | 0.396429822 |
| GRIN2D      | 0.377262404 | 0.424833663 |
| EGLN3       | 0.35420715  | 0.427324125 |

Table S3

|             |             |             |
|-------------|-------------|-------------|
| ZNF614      | 0.427340743 | 0.326688866 |
| TIMP2       | 0.427906953 | 0.397655497 |
| MXD1        | 0.429069833 | 0.330334463 |
| PKDCC       | 0.361797758 | 0.429725187 |
| SFMBT2      | 0.344571478 | 0.430611159 |
| PLP2        | 0.431162838 | 0.371546349 |
| DYRK2       | 0.349399676 | 0.431402838 |
| LOXL3       | 0.337308185 | 0.432114718 |
| DOK1        | 0.337308268 | 0.432115407 |
| TMSB10      | 0.346487281 | 0.43295041  |
| EVA1C       | 0.434009637 | 0.416985201 |
| SYNJ2       | 0.434044595 | 0.377296784 |
| DNAJC10     | 0.41325387  | 0.434496382 |
| FZD3        | 0.434630771 | 0.367603665 |
| KIRREL      | 0.435168201 | 0.41940162  |
| RPS6KA3     | 0.435884155 | 0.292247852 |
| ZNF347      | 0.436104478 | 0.433054579 |
| HSPBAP1     | 0.440346368 | 0.264763076 |
| TP53I3      | 0.431680359 | 0.440633861 |
| ANKRD44     | 0.354216724 | 0.44114336  |
| STK4        | 0.305577418 | 0.441628945 |
| PHACTR2     | 0.441863107 | 0.30109068  |
| RP1-111C20. | 0.298700267 | 0.442328546 |
| HMG4        | 0.39458524  | 0.443126008 |
| ZNF548      | 0.292036365 | 0.443258443 |
| ETS1        | 0.385071751 | 0.443436847 |
| PDE7A       | 0.444196662 | 0.421571495 |
| C1QTNF1     | 0.44015928  | 0.444534134 |
| NF1         | 0.444607921 | 0.343258878 |
| PMP22       | 0.445985181 | 0.402815098 |
| TAGLN2      | 0.410631525 | 0.446667451 |
| ANTXR1      | 0.371010854 | 0.44800178  |
| NXPE3       | 0.448138565 | 0.27467834  |
| UBASH3B     | 0.359455849 | 0.449668577 |
| SLC41A1     | 0.449690934 | 0.420957543 |
| TMEM217     | 0.449698291 | 0.314139174 |
| PPP1R12B    | 0.451087346 | 0.260029154 |
| PAG1        | 0.311640182 | 0.451441437 |
| LINC00092   | 0.33776175  | 0.452488826 |
| ANKRD36C    | 0.421146928 | 0.453125283 |
| SLC6A9      | 0.388165111 | 0.453161691 |
| QSOX1       | 0.429716669 | 0.454438777 |
| HMGCR       | 0.454635837 | 0.338687245 |
| PAPOLG      | 0.454943589 | 0.427355618 |
| MPP3        | 0.455015369 | 0.427755128 |
| AMIGO2      | 0.375510933 | 0.455745048 |
| PDE4B       | 0.456352712 | 0.335356282 |
| TMEM185B    | 0.400942851 | 0.456635366 |
| ALOX5       | 0.314869941 | 0.456796535 |

Table S3

|           |             |             |
|-----------|-------------|-------------|
| PRKX      | 0.456867885 | 0.455140328 |
| C10orf128 | 0.38293117  | 0.457544844 |
| DDHD1     | 0.457947775 | 0.378342924 |
| RFX5      | 0.352845674 | 0.458281015 |
| PAM       | 0.458964423 | 0.412575192 |
| ARMC2     | 0.459694287 | 0.255232991 |
| EMP3      | 0.30966654  | 0.46017564  |
| PRTFDC1   | 0.430369821 | 0.460880726 |
| NFKBIE    | 0.259102829 | 0.461440415 |
| KIAA0556  | 0.340739907 | 0.462440782 |
| WIPF1     | 0.34676681  | 0.463047473 |
| UBE2Q2    | 0.463428871 | 0.440399557 |
| DNM3      | 0.467082408 | 0.422656904 |
| PACS1     | 0.374660341 | 0.467571481 |
| STARD3NL  | 0.468386762 | 0.421478563 |
| ABR       | 0.311538208 | 0.469761066 |
| MAFK      | 0.471025329 | 0.401034756 |
| EML2      | 0.455654106 | 0.472472699 |
| HECA      | 0.329154364 | 0.477860286 |
| FHOD1     | 0.409563151 | 0.478254394 |
| ZNF611    | 0.394147266 | 0.479161963 |
| FAM188B   | 0.479380553 | 0.359578773 |
| FKBP10    | 0.458698707 | 0.479916874 |
| CEP85L    | 0.48009881  | 0.3076561   |
| CAV2      | 0.480104376 | 0.282719802 |
| PRDM1     | 0.46971767  | 0.48160546  |
| TMEM184B  | 0.481630466 | 0.478697692 |
| IER5      | 0.373800487 | 0.482383647 |
| GPRASP1   | 0.388498378 | 0.482426021 |
| ANK1      | 0.333210293 | 0.482820413 |
| GAS8      | 0.434694814 | 0.48323083  |
| HIST1H4H  | 0.416846494 | 0.484887456 |
| PIP4K2A   | 0.40369193  | 0.484900626 |
| FAM57A    | 0.42520587  | 0.484943301 |
| ARF3      | 0.40778092  | 0.4854765   |
| STXBP1    | 0.487709912 | 0.460779663 |
| SYTL3     | 0.239362443 | 0.488129786 |
| SCLT1     | 0.489331285 | 0.426597413 |
| TPM2      | 0.490370619 | 0.488065297 |
| ARRDC4    | 0.349732724 | 0.490549623 |
| RUNX1     | 0.491034796 | 0.396241437 |
| LHFPL2    | 0.49123161  | 0.346824537 |
| CUEDC1    | 0.491619923 | 0.333361438 |
| SEL1L3    | 0.413177057 | 0.491640707 |
| ZC3HAV1L  | 0.386688012 | 0.492259925 |
| DACT1     | 0.493396734 | 0.452295073 |
| ANK3      | 0.378458505 | 0.495036288 |
| BIRC3     | 0.483974999 | 0.495183938 |
| APH1B     | 0.49565719  | 0.467480552 |



Table S3

|             |             |             |
|-------------|-------------|-------------|
| PDE4D       | 0.496521199 | 0.36657125  |
| CMTM7       | 0.338289337 | 0.496557216 |
| TYROBP      | 0.303109642 | 0.496969001 |
| GLIPR2      | 0.303163715 | 0.497178503 |
| IKZF2       | 0.497523031 | 0.271862667 |
| CACNB3      | 0.444635237 | 0.498693092 |
| ARHGAP27    | 0.302433991 | 0.499743407 |
| MMP25       | 0.363762336 | 0.500073192 |
| ABCC4       | 0.500754987 | 0.374485403 |
| PPP1R2      | 0.30381138  | 0.501012439 |
| PHLDB1      | 0.397872735 | 0.501248605 |
| MEF2C       | 0.502942455 | 0.358971574 |
| CEP97       | 0.503328626 | 0.4070238   |
| ITPKB       | 0.333122048 | 0.504518486 |
| METRNL      | 0.321827262 | 0.506598937 |
| COL4A1      | 0.506930346 | 0.452896292 |
| DBN1        | 0.463452059 | 0.50779986  |
| TNFAIP8     | 0.416893454 | 0.509512265 |
| CHST15      | 0.509877616 | 0.433531977 |
| HID1        | 0.446486353 | 0.510274668 |
| FBLIM1      | 0.510973153 | 0.448519174 |
| PCSK5       | 0.512893662 | 0.401550072 |
| ARRDC2      | 0.438137992 | 0.514273212 |
| MFSD7       | 0.323025763 | 0.514448714 |
| SMARCD3     | 0.377906081 | 0.514566689 |
| MMP14       | 0.514579971 | 0.357666286 |
| STK32C      | 0.298177767 | 0.514822836 |
| BARD1       | 0.515778395 | 0.49116312  |
| ARHGEF19    | 0.347176259 | 0.515974944 |
| RP11-344B5. | 0.476886812 | 0.516007704 |
| GATA2       | 0.407348652 | 0.516425777 |
| FAM102B     | 0.510185364 | 0.51646631  |
| PHF20       | 0.359671859 | 0.517148783 |
| FOS         | 0.517234824 | 0.498433236 |
| PLAGL1      | 0.36332848  | 0.51831473  |
| ADAMTS10    | 0.518913035 | 0.459491976 |
| VCL         | 0.519639895 | 0.309331897 |
| NFKB2       | 0.376319496 | 0.520614223 |
| ZNF267      | 0.522100613 | 0.403892853 |
| ZNF737      | 0.522322047 | 0.509692248 |
| ARHGDIB     | 0.42518457  | 0.522457564 |
| ZNF85       | 0.497666166 | 0.522663364 |
| GEM         | 0.493699669 | 0.522751691 |
| SH3YL1      | 0.524620877 | 0.396174751 |
| TP53BP1     | 0.417989943 | 0.525821354 |
| CHST3       | 0.525971357 | 0.398703752 |
| MEF2C-AS1   | 0.52831047  | 0.435842477 |
| BTN2A3P     | 0.456185576 | 0.528912072 |
| RP11-10K16. | 0.47912049  | 0.529424477 |

Table S3

|            |             |             |
|------------|-------------|-------------|
| GALNT7     | 0.479120496 | 0.529427407 |
| PPP1R15A   | 0.514389737 | 0.529603346 |
| CASP1      | 0.530043107 | 0.38226252  |
| FAM131A    | 0.530523529 | 0.470298667 |
| CDKN2A     | 0.53121383  | 0.498922577 |
| CHST11     | 0.350138133 | 0.531216338 |
| NEURL3     | 0.532005762 | 0.405252886 |
| SPINT2     | 0.408651085 | 0.532163047 |
| RIN1       | 0.501040364 | 0.532660833 |
| ANKDD1B    | 0.533389258 | 0.362108813 |
| CDKN1A     | 0.535850244 | 0.370355654 |
| PAQR8      | 0.42941828  | 0.535908149 |
| RASGRP3    | 0.53609675  | 0.426859625 |
| PDE3A      | 0.53625641  | 0.412633357 |
| PDE5A      | 0.537329583 | 0.459864608 |
| DNAJB6     | 0.431645686 | 0.537396201 |
| GIPR       | 0.535012512 | 0.539011536 |
| NKRF       | 0.539077522 | 0.488154126 |
| TNFRSF12A  | 0.540172975 | 0.475554852 |
| B3GNT7     | 0.404921375 | 0.543105597 |
| SLC1A5     | 0.417498642 | 0.543489452 |
| NOTCH3     | 0.543693344 | 0.387966504 |
| HCG11      | 0.357110286 | 0.545716937 |
| AC092835.2 | 0.362936754 | 0.545870322 |
| HDAC7      | 0.464499603 | 0.546081129 |
| ARL4C      | 0.385958776 | 0.547515878 |
| RPS6KA1    | 0.244894897 | 0.547838208 |
| SLC26A2    | 0.477197812 | 0.547998395 |
| E2F3       | 0.549127291 | 0.409319498 |
| C10orf54   | 0.270966738 | 0.552166164 |
| NFKBID     | 0.35908523  | 0.552198181 |
| HCST       | 0.359085353 | 0.552198201 |
| ENDOD1     | 0.552480245 | 0.552217026 |
| IMPDH1     | 0.409027171 | 0.55270406  |
| ANXA2R     | 0.553410786 | 0.523316385 |
| AC025171.1 | 0.553410789 | 0.523316435 |
| PEA15      | 0.555507539 | 0.546543456 |
| TRABD2A    | 0.340771033 | 0.556057905 |
| FLVCR1     | 0.5560836   | 0.337673047 |
| TUBB6      | 0.556252434 | 0.491547156 |
| CHORDC1    | 0.556449598 | 0.541511635 |
| CAV1       | 0.557498756 | 0.30249684  |
| SLC35F2    | 0.558606474 | 0.51792416  |
| TNFSF8     | 0.512930163 | 0.55941066  |
| PDP1       | 0.392131742 | 0.559931073 |
| NRSN2      | 0.560690894 | 0.560408616 |
| FAM167A    | 0.456280796 | 0.562433878 |
| FMNL3      | 0.36738023  | 0.56260499  |
| PHF19      | 0.307881952 | 0.562636115 |

Table S3

|             |             |             |
|-------------|-------------|-------------|
| AP3M2       | 0.312142642 | 0.562985459 |
| MTHFD1L     | 0.563113995 | 0.388935503 |
| ITPR3       | 0.347230059 | 0.563192021 |
| SYK         | 0.563372447 | 0.54784322  |
| ISG20       | 0.450280119 | 0.566118365 |
| TRIM31      | 0.515903581 | 0.567107576 |
| RARG        | 0.381317291 | 0.56736657  |
| TMEM51      | 0.567479855 | 0.423530116 |
| RP11-712B9. | 0.512347276 | 0.567727404 |
| PCBP3       | 0.458314433 | 0.568121124 |
| ARHGAP31    | 0.562569988 | 0.568878284 |
| INPP4B      | 0.501956565 | 0.569897846 |
| PRICKLE1    | 0.570264607 | 0.568914698 |
| SWAP70      | 0.571210056 | 0.547021419 |
| TMEM173     | 0.313752238 | 0.571944503 |
| ALOX5AP     | 0.476686609 | 0.574000251 |
| WNT4        | 0.446798283 | 0.57537098  |
| C5orf30     | 0.575917812 | 0.507481097 |
| MARCH3      | 0.576055231 | 0.450017656 |
| PWWP2B      | 0.302477509 | 0.576423161 |
| PTPRH       | 0.576704696 | 0.532198117 |
| TMEM51-AS1  | 0.576892658 | 0.421529415 |
| HNRNPA1L2   | 0.566836198 | 0.579293926 |
| DBNDD1      | 0.551593248 | 0.579503918 |
| ADAM9       | 0.580951303 | 0.276442036 |
| AP1S3       | 0.581252425 | 0.489957904 |
| GSTM5       | 0.535085686 | 0.58281795  |
| GSN         | 0.583038296 | 0.349205276 |
| PLAU        | 0.369327975 | 0.584164174 |
| RAB8B       | 0.584385099 | 0.435094975 |
| ZNF486      | 0.513653742 | 0.584671173 |
| CHD3        | 0.349743855 | 0.584893401 |
| RP11-848P1. | 0.579554881 | 0.585260645 |
| ZNF853      | 0.407358804 | 0.586522537 |
| DLG3        | 0.528967315 | 0.586854813 |
| FGFR1       | 0.587809055 | 0.510332868 |
| STX11       | 0.589569559 | 0.557751235 |
| ZSWIM4      | 0.589734431 | 0.562869664 |
| CD83        | 0.434278257 | 0.59034087  |
| P2RX1       | 0.39595553  | 0.592074792 |
| SYCP2       | 0.507744487 | 0.593534714 |
| PHLDA3      | 0.593619128 | 0.481793213 |
| SLC25A24    | 0.595278352 | 0.450309161 |
| FAR1        | 0.379336753 | 0.595745636 |
| ITGA3       | 0.596532834 | 0.575199784 |
| IL34        | 0.526819781 | 0.596731065 |
| PPDPF       | 0.373178284 | 0.596880138 |
| COL16A1     | 0.539115511 | 0.598463585 |
| FUT4        | 0.525829321 | 0.598517053 |

Table S3

|           |             |             |
|-----------|-------------|-------------|
| ZDHHC1    | 0.599395955 | 0.491279916 |
| TPM4      | 0.420217884 | 0.599852113 |
| MCAM      | 0.600988239 | 0.507317604 |
| STAT4     | 0.601068057 | 0.568990497 |
| FBLN5     | 0.412151937 | 0.601102592 |
| HMGA1     | 0.446509098 | 0.601223769 |
| ZSCAN9    | 0.60170843  | 0.450160344 |
| LOXL1     | 0.392251889 | 0.60176019  |
| ENAH      | 0.602824516 | 0.370603715 |
| IFI27L2   | 0.58017434  | 0.602933474 |
| KIF3C     | 0.544753065 | 0.604347027 |
| EIF5A2    | 0.583215851 | 0.604884516 |
| F3        | 0.6056885   | 0.491853766 |
| CD96      | 0.566130891 | 0.606237104 |
| TRNP1     | 0.60679965  | 0.396134101 |
| ITM2C     | 0.474441429 | 0.608117542 |
| CLSTN1    | 0.526125776 | 0.609830867 |
| MTHFD2    | 0.491592573 | 0.610179805 |
| LINC00271 | 0.611760602 | 0.365382416 |
| AHI1      | 0.61176064  | 0.365382539 |
| PTGER4    | 0.378194404 | 0.612572855 |
| SRGN      | 0.612651009 | 0.565882212 |
| PARP6     | 0.409681335 | 0.612664171 |
| C1orf116  | 0.612768101 | 0.482580222 |
| CYS1      | 0.614048741 | 0.587103886 |
| ZNF816    | 0.490121369 | 0.615091517 |
| ATP9A     | 0.615486653 | 0.311866672 |
| CYTIP     | 0.530097039 | 0.615903841 |
| C1orf145  | 0.425811014 | 0.616010027 |
| COL12A1   | 0.617872719 | 0.554285849 |
| SESN3     | 0.411890139 | 0.619608405 |
| ALDH1A3   | 0.620365164 | 0.548935512 |
| PDLIM4    | 0.620418181 | 0.520717767 |
| ABCC1     | 0.602252697 | 0.621409834 |
| ARSJ      | 0.621802897 | 0.38518403  |
| RELB      | 0.401047262 | 0.62198863  |
| MYOF      | 0.62355697  | 0.479672522 |
| GSTP1     | 0.565258276 | 0.624030881 |
| RHOQ      | 0.62453525  | 0.506191347 |
| LRP8      | 0.442363469 | 0.624793464 |
| DAGLA     | 0.598291345 | 0.624924429 |
| LTBP4     | 0.355422168 | 0.624952145 |
| BATF3     | 0.625352233 | 0.609677722 |
| TEAD4     | 0.62582399  | 0.435645967 |
| TP53I11   | 0.592368952 | 0.626140933 |
| COL1A2    | 0.478290766 | 0.626283835 |
| RIMKLB    | 0.627178251 | 0.459354882 |
| RIPK3     | 0.490965292 | 0.627724498 |
| MYO5A     | 0.409209879 | 0.62779222  |

Table S3

|             |             |             |
|-------------|-------------|-------------|
| PYGO1       | 0.452025227 | 0.628402572 |
| ROBO1       | 0.628490964 | 0.55898068  |
| ZNF529      | 0.557124579 | 0.628588981 |
| RAB11FIP5   | 0.629195582 | 0.366165132 |
| RECK        | 0.629476899 | 0.43788935  |
| BEX4        | 0.591085104 | 0.630052112 |
| SFXN3       | 0.587975754 | 0.630408542 |
| PIWIL4      | 0.631344199 | 0.538626102 |
| SPECC1      | 0.479480724 | 0.634446756 |
| PAQR5       | 0.634673137 | 0.531130076 |
| PLEKHG4     | 0.383659055 | 0.634953015 |
| PRR7        | 0.479013296 | 0.634968605 |
| NMNAT2      | 0.635881775 | 0.635615522 |
| ISYNA1      | 0.439517876 | 0.6369664   |
| VIM-AS1     | 0.511396095 | 0.637303626 |
| LINC00982   | 0.607172943 | 0.63741163  |
| GBGT1       | 0.41594828  | 0.638345649 |
| ZNF667-AS1  | 0.528779455 | 0.638381935 |
| ZNF667      | 0.528779164 | 0.638382088 |
| RAB11FIP1   | 0.385998578 | 0.638469335 |
| ODF2L       | 0.638581945 | 0.608583863 |
| NCK2        | 0.518033314 | 0.638670339 |
| DZIP1L      | 0.639337214 | 0.600650837 |
| SLC38A1     | 0.588848903 | 0.63944904  |
| AKR1B1      | 0.569292965 | 0.640323958 |
| SCRN1       | 0.641715083 | 0.569662547 |
| HENMT1      | 0.413490647 | 0.642825889 |
| SLC45A4     | 0.48788347  | 0.64300174  |
| VIM         | 0.505487077 | 0.644339332 |
| ZNF506      | 0.644617345 | 0.610131543 |
| SLC4A8      | 0.420422182 | 0.6446396   |
| OSBPL7      | 0.455450531 | 0.644856718 |
| MLLT3       | 0.599369123 | 0.645692864 |
| AC144831.1  | 0.589795389 | 0.647426211 |
| RP11-353N14 | 0.53817712  | 0.648323935 |
| TMEM243     | 0.494265279 | 0.649205916 |
| PLD4        | 0.502701344 | 0.649919532 |
| SLC7A6      | 0.415123721 | 0.651101267 |
| FRAS1       | 0.651770989 | 0.538172221 |
| XYLT1       | 0.427888943 | 0.651792969 |
| CHIT1       | 0.390419541 | 0.651995798 |
| DNAJC6      | 0.653386652 | 0.566178783 |
| BICD1       | 0.653645784 | 0.566036138 |
| CYR61       | 0.65428371  | 0.475106685 |
| ZNF426      | 0.654417115 | 0.436738757 |
| OBSCN       | 0.403118771 | 0.655132817 |
| CLCF1       | 0.655495699 | 0.62940671  |
| S100A11     | 0.657029663 | 0.602158539 |
| SLC6A6      | 0.440546891 | 0.657709451 |

Table S3

|             |             |             |
|-------------|-------------|-------------|
| CARD16      | 0.659081736 | 0.583869113 |
| C7orf31     | 0.406849569 | 0.660036834 |
| LCA5        | 0.660079501 | 0.43118261  |
| ZFP82       | 0.625990458 | 0.660677336 |
| LXN         | 0.661118683 | 0.483500037 |
| KIAA0226L   | 0.508741315 | 0.661907654 |
| LBH         | 0.344988323 | 0.661916514 |
| CD59        | 0.662925519 | 0.372558905 |
| RP11-44N21. | 0.503208663 | 0.663164549 |
| BCL11A      | 0.569817577 | 0.663195155 |
| ATP6V1E2    | 0.663221309 | 0.524883363 |
| SOD3        | 0.584113812 | 0.663305316 |
| ABCA7       | 0.273735575 | 0.664557175 |
| VANGL2      | 0.664977753 | 0.631817024 |
| MAP2        | 0.665740249 | 0.441906702 |
| TUBA1A      | 0.537600306 | 0.666033171 |
| FLRT2       | 0.666327567 | 0.550876944 |
| IFT57       | 0.666688379 | 0.535326684 |
| AC006129.2  | 0.405755167 | 0.667070756 |
| RP11-1149O2 | 0.53127556  | 0.669059338 |
| NFATC4      | 0.563652334 | 0.669185203 |
| ADRA2A      | 0.668960964 | 0.670133927 |
| KIAA1549    | 0.670777877 | 0.384693703 |
| RAP1GAP2    | 0.670590107 | 0.672009108 |
| PKM         | 0.645631999 | 0.674460735 |
| HLA-L       | 0.532802191 | 0.676069925 |
| CD44        | 0.414713869 | 0.677186835 |
| ORAI2       | 0.406714184 | 0.678430999 |
| STK39       | 0.555015527 | 0.679326707 |
| PTP4A3      | 0.336537952 | 0.679821803 |
| RASSF3      | 0.674825272 | 0.681187081 |
| IGF2BP2     | 0.615170482 | 0.685164517 |
| TRIM59      | 0.494951122 | 0.687183853 |
| ARMCX1      | 0.67367224  | 0.692607097 |
| PDGFA       | 0.692748857 | 0.64020435  |
| MAML2       | 0.692868133 | 0.614441612 |
| HOMER1      | 0.645885319 | 0.694713666 |
| SLC25A36    | 0.618226778 | 0.695150081 |
| MEX3B       | 0.488256445 | 0.695256891 |
| KCNAB2      | 0.280171352 | 0.695712015 |
| RP11-4O1.2  | 0.696998822 | 0.64007133  |
| ZNF14       | 0.509113578 | 0.697003092 |
| CSGALNACT   | 0.697211201 | 0.53962567  |
| ZNF43       | 0.697660428 | 0.660418506 |
| FAM60A      | 0.69798662  | 0.576873459 |
| ZDHHC13     | 0.592845673 | 0.701343126 |
| ROR2        | 0.479533781 | 0.701468525 |
| LRRC8B      | 0.702189748 | 0.435268295 |
| SNPH        | 0.658618236 | 0.703076302 |

Table S3

|             |             |             |
|-------------|-------------|-------------|
| LAPTM5      | 0.355692684 | 0.703162712 |
| PIK3IP1     | 0.458725852 | 0.703678931 |
| SIK1        | 0.575175777 | 0.704032935 |
| PDE4A       | 0.502387205 | 0.707425463 |
| SLC6A8      | 0.492512832 | 0.709858623 |
| LETM2       | 0.70993884  | 0.518588338 |
| NLRP1       | 0.33686951  | 0.712029867 |
| SLFN11      | 0.571798012 | 0.71204882  |
| CDC7        | 0.713855959 | 0.465142137 |
| AFAP1       | 0.636247917 | 0.71489051  |
| ZC2HC1A     | 0.629179178 | 0.716519229 |
| FMNL1       | 0.324273897 | 0.717821922 |
| OSBPL3      | 0.546605845 | 0.718724882 |
| SLC7A7      | 0.719253637 | 0.656425014 |
| NFE2L3      | 0.574755836 | 0.719681886 |
| TNFRSF21    | 0.719694702 | 0.546953084 |
| CHST10      | 0.719728816 | 0.612378244 |
| SELM        | 0.56812723  | 0.719758395 |
| RP11-325F22 | 0.504605968 | 0.720904511 |
| MST1R       | 0.471818744 | 0.720963103 |
| STX3        | 0.721029849 | 0.48367941  |
| MFSD6       | 0.522895394 | 0.72111097  |
| MIR24-2     | 0.539064298 | 0.721400786 |
| TNFRSF10A   | 0.504172594 | 0.721506148 |
| GABBR1      | 0.650014502 | 0.721575598 |
| S100A4      | 0.368205207 | 0.72160432  |
| TMED3       | 0.672216204 | 0.722522567 |
| LMTK3       | 0.535816763 | 0.724229814 |
| CNN2        | 0.352231279 | 0.724444832 |
| NFATC1      | 0.530487375 | 0.724553046 |
| SGCA        | 0.72589799  | 0.719817199 |
| HTR7        | 0.475920305 | 0.727896868 |
| ZNF462      | 0.730060555 | 0.448876496 |
| EPB41L4A    | 0.730407794 | 0.578174473 |
| TC2N        | 0.566990497 | 0.730476923 |
| STK17B      | 0.457297522 | 0.731689385 |
| FAM43A      | 0.38031763  | 0.7321046   |
| ZNF682      | 0.732581884 | 0.552419208 |
| CDR2L       | 0.732599979 | 0.521053825 |
| ANXA1       | 0.732640229 | 0.578697593 |
| DBNDD2      | 0.733101326 | 0.733446323 |
| MCTP2       | 0.734541442 | 0.717216957 |
| CACNB1      | 0.471286319 | 0.739314503 |
| TRPC1       | 0.741884183 | 0.596541628 |
| NCR3LG1     | 0.742760607 | 0.604957529 |
| GDPD1       | 0.746106966 | 0.520454335 |
| ZNF551      | 0.551751402 | 0.747659986 |
| EFEMP1      | 0.683044106 | 0.748331595 |
| WDR54       | 0.457499479 | 0.748564522 |

Table S3

|             |             |             |
|-------------|-------------|-------------|
| BTG2        | 0.6140358   | 0.748932299 |
| GPR160      | 0.699344485 | 0.755159106 |
| PCYOX1L     | 0.493903559 | 0.755826569 |
| ENO2        | 0.560165372 | 0.757274638 |
| PTPN13      | 0.731357558 | 0.757326872 |
| MAPK10      | 0.73135737  | 0.757328391 |
| SRGAP1      | 0.758608897 | 0.604731801 |
| RP11-196G18 | 0.655489782 | 0.758919177 |
| METTL24     | 0.760346167 | 0.717229338 |
| LOXL1-AS1   | 0.47086974  | 0.76116581  |
| ZNF135      | 0.612341726 | 0.76129642  |
| AC006273.5  | 0.761592411 | 0.735830544 |
| SLC7A1      | 0.763431281 | 0.686349262 |
| KCNN4       | 0.395429344 | 0.763767929 |
| NRARP       | 0.614133349 | 0.764442552 |
| LRRC7       | 0.764575923 | 0.654624368 |
| S100A6      | 0.714107626 | 0.765573208 |
| DUSP4       | 0.767199069 | 0.565289109 |
| TES         | 0.646417788 | 0.76721734  |
| RASSF2      | 0.425200189 | 0.767442211 |
| PFKP        | 0.768633429 | 0.394878914 |
| IL32        | 0.420361459 | 0.770590699 |
| C11orf63    | 0.766416415 | 0.770703934 |
| PLEKHN1     | 0.770906645 | 0.752773168 |
| SERTAD4     | 0.613864741 | 0.77235122  |
| SPHK1       | 0.773529454 | 0.596747352 |
| ZNF93       | 0.741363503 | 0.77732631  |
| DOCK8       | 0.71316828  | 0.779981583 |
| DNAJA4      | 0.416739648 | 0.78066734  |
| GUCY1A3     | 0.781015227 | 0.439094629 |
| FAT1        | 0.781612057 | 0.413205722 |
| SEZ6L2      | 0.783008462 | 0.520468142 |
| ENPP2       | 0.669858036 | 0.783270475 |
| HAGHL       | 0.328326461 | 0.783645084 |
| ZNF430      | 0.62275886  | 0.786366379 |
| KIF5C       | 0.569014994 | 0.786950832 |
| PMAIP1      | 0.788059081 | 0.769719603 |
| MIR155HG    | 0.638337376 | 0.789006148 |
| SLC44A3     | 0.789968912 | 0.355792823 |
| OSM         | 0.457170621 | 0.790183323 |
| GLIS2       | 0.585536632 | 0.790811995 |
| HS3ST1      | 0.791348044 | 0.56934978  |
| MB21D2      | 0.791620807 | 0.612794891 |
| PAPLN       | 0.609780895 | 0.791866577 |
| ZNF83       | 0.749871293 | 0.795918019 |
| ZNF525      | 0.650878704 | 0.797975343 |
| JAK3        | 0.427699277 | 0.799078128 |
| CD24P4      | 0.799895556 | 0.793790186 |
| GLS         | 0.768838958 | 0.801281969 |



Table S3

|             |             |             |
|-------------|-------------|-------------|
| CDS1        | 0.804153551 | 0.63792143  |
| PDZK1IP1    | 0.804195646 | 0.590929172 |
| SGPP2       | 0.806420656 | 0.748435724 |
| EMILIN2     | 0.565521219 | 0.809275777 |
| ZNF738      | 0.714205807 | 0.810129303 |
| ZNF827      | 0.61687125  | 0.81182985  |
| KIAA1324L   | 0.640722181 | 0.81313444  |
| CRIM1       | 0.813517637 | 0.572747295 |
| ARHGAP22    | 0.81355971  | 0.532179415 |
| LGALS3      | 0.815548829 | 0.804608385 |
| SLFN12      | 0.585871572 | 0.817637252 |
| AC009495.4  | 0.820258391 | 0.627158372 |
| GALNT3      | 0.820258899 | 0.627159731 |
| LAYN        | 0.825700128 | 0.56557893  |
| CDH11       | 0.789476967 | 0.827060526 |
| NBEA        | 0.828162605 | 0.557642957 |
| SUSD1       | 0.828645713 | 0.638203084 |
| IFI16       | 0.829001214 | 0.570937517 |
| MICAL1      | 0.408091123 | 0.832290004 |
| PRDM8       | 0.414706901 | 0.833179856 |
| EPHA4       | 0.840700397 | 0.515347282 |
| IL20RA      | 0.84074687  | 0.630800091 |
| MCOLN3      | 0.847995989 | 0.823109831 |
| MOXD1       | 0.618190369 | 0.855717574 |
| ZNF610      | 0.855800767 | 0.76624814  |
| C2CD4A      | 0.858076993 | 0.613315645 |
| PTPN14      | 0.85928039  | 0.542402552 |
| CLDN4       | 0.863854077 | 0.707327231 |
| ZNF320      | 0.699400505 | 0.864345226 |
| SULT1C4     | 0.866619701 | 0.558533594 |
| C1orf198    | 0.86838867  | 0.757718806 |
| RP11-255H23 | 0.783483461 | 0.871348213 |
| RP11-54O7.1 | 0.660607031 | 0.874922543 |
| HES4        | 0.660606977 | 0.874922567 |
| ZNF439      | 0.775400301 | 0.877639273 |
| OXCT1       | 0.690523756 | 0.880938235 |
| HLA-V       | 0.659680379 | 0.881358994 |
| HCG4        | 0.659681135 | 0.881359099 |
| NACAD       | 0.885404059 | 0.789489556 |
| KLHL29      | 0.886880975 | 0.78426889  |
| GRAMD1B     | 0.88789388  | 0.878245233 |
| BHLHE41     | 0.893801594 | 0.820460439 |
| CXCL1       | 0.893977743 | 0.496767088 |
| ETV4        | 0.895057992 | 0.771479384 |
| LOXL4       | 0.83770117  | 0.896403241 |
| SPINT1      | 0.901905301 | 0.813207289 |
| TUBB3       | 0.779011781 | 0.90258575  |
| SLFN13      | 0.716471682 | 0.904740565 |
| TESC        | 0.911545657 | 0.715589596 |

Table S3

|            |             |             |
|------------|-------------|-------------|
| SSPN       | 0.913338286 | 0.80776856  |
| HKDC1      | 0.802670981 | 0.91553292  |
| GPRC5B     | 0.915824356 | 0.719255441 |
| B3GALT5    | 0.822985522 | 0.922413417 |
| LEF1       | 0.645811568 | 0.927960289 |
| CCND2      | 0.51570471  | 0.932971738 |
| BACE2      | 0.938732448 | 0.934214528 |
| LAMA2      | 0.945124921 | 0.704265369 |
| ZNF781     | 0.895821399 | 0.947398013 |
| WFDC2      | 0.951171421 | 0.842557026 |
| LPAR2      | 0.749840228 | 0.952564523 |
| ITGA2      | 0.954180973 | 0.728965144 |
| COL4A4     | 0.716633371 | 0.960954747 |
| COL4A3     | 0.716633311 | 0.960955383 |
| TAF4B      | 0.601467961 | 0.961993568 |
| ITGAM      | 0.968179497 | 0.818790204 |
| ASNS       | 0.808192233 | 0.9686812   |
| SOX4       | 0.970143129 | 0.643366548 |
| ZNF607     | 0.968012074 | 0.971053252 |
| HSPA4L     | 0.97111408  | 0.703913228 |
| PRSS22     | 0.973147344 | 0.785889909 |
| KRT80      | 0.975656829 | 0.776899478 |
| ANXA3      | 0.982886526 | 0.654180672 |
| DCDC2      | 0.983448991 | 0.845566771 |
| ZNF665     | 0.988269337 | 0.988497735 |
| C1orf106   | 0.989172252 | 0.922847025 |
| ZNF888     | 0.902022049 | 0.992049305 |
| BDKRB2     | 1.002198914 | 0.754592751 |
| ZNF66      | 0.786372916 | 1.006124139 |
| AC098614.2 | 0.73989189  | 1.0094951   |
| ANKRD18A   | 1.010704235 | 0.791441548 |
| FAM201A    | 1.010704236 | 0.791441029 |
| KLF5       | 1.019392782 | 0.618661708 |
| ITGB8      | 1.020499958 | 0.950670586 |
| ST8SIA1    | 0.528063147 | 1.022562452 |
| ADAMTS9-AS | 1.038019788 | 0.676904114 |
| ADAMTS9    | 1.038019805 | 0.676904237 |
| ZNF793     | 1.036346123 | 1.04053639  |
| C3orf52    | 1.056461919 | 0.74854065  |
| CXCR4      | 0.69277409  | 1.056946558 |
| TGFB2      | 1.072455418 | 0.668162167 |
| YBX3       | 1.07488767  | 0.602134294 |
| CXCL6      | 1.076024925 | 0.821228508 |
| F2RL1      | 1.078222981 | 0.628091109 |
| GULP1      | 1.083348983 | 0.871062949 |
| ZNF382     | 0.915147688 | 1.089436784 |
| EVC        | 0.70441736  | 1.090294651 |
| TNFRSF11B  | 1.092919974 | 0.804327087 |
| PDX1       | 1.038066861 | 1.102100707 |

Table S3

|             |             |             |
|-------------|-------------|-------------|
| MDFI        | 0.99970847  | 1.10729961  |
| NPNT        | 1.110846966 | 0.906999492 |
| PMEPA1      | 1.118648747 | 0.985973345 |
| FAM150B     | 1.129388839 | 0.933550042 |
| WNT10A      | 0.540257361 | 1.132005477 |
| TTC9        | 0.913266615 | 1.132654105 |
| TMEM55A     | 1.137570012 | 1.020245422 |
| EVC2        | 0.799160515 | 1.139165169 |
| HSPB8       | 1.025749728 | 1.15133921  |
| ZNF431      | 1.052420036 | 1.161452699 |
| B3GNT3      | 1.165471157 | 1.134595624 |
| GABRE       | 1.165947655 | 0.831243871 |
| CTD-2008P7. | 1.167133326 | 0.994370144 |
| TBC1D30     | 1.188216141 | 0.751231151 |
| GABRB3      | 1.082992753 | 1.197477394 |
| RASEF       | 1.227243277 | 1.072807054 |
| VCAN        | 1.229051871 | 0.768855041 |
| LRRC1       | 1.161178434 | 1.239454453 |
| KRT7        | 1.292728533 | 1.012872642 |
| ZNF714      | 0.995374963 | 1.303713055 |
| CLIC6       | 1.327757594 | 1.073494196 |
| DUSP8       | 1.116378379 | 1.335635054 |
| CDH6        | 1.381288476 | 1.127881105 |
| EPCAM       | 1.393948787 | 1.362415936 |
| SNAP25      | 1.47530976  | 1.063873301 |
| ID4         | 1.246928763 | 1.520771853 |
| SOX9        | 1.556321384 | 1.610091505 |
| DTNA        | 1.746428474 | 1.814806457 |
