# Supplementary material
Source: PubMed Central journal article supplement (PMC7788265)
Supplement: gutjnl-2019-318918supp003.pdf [file gutjnl-2019-318918supp003.pdf]

Table S5

| Gene        | NASH        | HCV         | DAA         |
|-------------|-------------|-------------|-------------|
| DPPA4       | -0.99149595 | -1.50988763 | -1.85278329 |
| RP11-423H2. | -0.94754738 | -1.48155106 | -1.11587793 |
| ABCC6P2     | -1.24512898 | -1.44208662 | -2.39711258 |
| KCNN2       | -0.76184643 | -1.39228038 | -1.7513016  |
| CLRN1-AS1   | -0.96441909 | -1.3557784  | -2.29260612 |
| GYG2        | -0.69968025 | -1.26305098 | -1.3847502  |
| RP11-205M3. | -0.66576087 | -1.19639311 | -1.37080583 |
| AC114730.3  | -0.95312175 | -1.15783489 | -1.41981494 |
| U91319.1    | -0.59765221 | -1.15552389 | -1.66908975 |
| CES5A       | -0.58376485 | -1.15154589 | -1.42235949 |
| PZP         | -0.69107133 | -1.14231349 | -1.13357456 |
| RP3-475N16. | -1.13779469 | -0.98193217 | -1.81156881 |
| AGXT        | -1.12923854 | -0.75283994 | -2.05127195 |
| HORMAD2     | -1.09406334 | -1.11939868 | -1.61383914 |
| CAPN3       | -0.85622675 | -1.11518713 | -1.31023632 |
| RP11-164J13 | -0.85622679 | -1.11518708 | -1.31023669 |
| GNMT        | -1.1093108  | -1.01696047 | -1.6901446  |
| NEU4        | -0.9270435  | -1.10879394 | -1.33998638 |
| SLC6A13     | -0.90009565 | -1.09119231 | -1.73221824 |
| RP11-626H12 | -0.84179363 | -1.07827663 | -1.43341265 |
| GCK         | -1.06523593 | -0.86809113 | -1.72219608 |
| KANK4       | -0.74251028 | -1.0564263  | -1.26112939 |
| LPA         | -0.49306007 | -1.0169621  | -1.08914008 |
| CNDP1       | -0.63792646 | -0.9987607  | -1.29617838 |
| CYP1A2      | -0.98668091 | -0.81786809 | -1.53832415 |
| AOC1        | -0.53624729 | -0.98432856 | -1.19240338 |
| MAD1L1      | -0.97826581 | -0.87221391 | -1.1756736  |
| CHRNA4      | -0.81746823 | -0.96924072 | -1.78045746 |
| RP11-261N11 | -0.81746808 | -0.96924071 | -1.78045763 |
| ESPNL       | -0.94309271 | -0.70166788 | -1.03301781 |
| TMTC1       | -0.4180584  | -0.94205862 | -1.15413525 |
| GSTA2       | -0.93792451 | -0.88896097 | -1.55863558 |
| ACSM2B      | -0.91701906 | -0.89974648 | -1.93800712 |
| MROH7       | -0.89045029 | -0.91423505 | -1.58878586 |
| SLC2A4RG    | -0.9095737  | -0.59876869 | -1.2791541  |
| LIME1       | -0.90957369 | -0.59876869 | -1.27915412 |
| NAT2        | -0.48889312 | -0.90882634 | -1.30657392 |
| APOC3       | -0.89246412 | -0.45008406 | -1.66710107 |
| APOA1       | -0.89246411 | -0.45008404 | -1.66710121 |
| GCGR        | -0.89023552 | -0.62501281 | -1.23468787 |
| ACADS       | -0.78259387 | -0.88482951 | -1.08998749 |
| IGFALS      | -0.88450169 | -0.6259388  | -1.33663839 |
| CPNE6       | -0.87891263 | -0.80760341 | -1.53001471 |
| THOP1       | -0.86939272 | -0.74055984 | -0.88881774 |
| GCDH        | -0.86451674 | -0.61958447 | -0.93363663 |
| FAM151A     | -0.83402025 | -0.85612392 | -1.53880613 |
| LINC00844   | -0.64764145 | -0.84587488 | -1.56903563 |
| AOX1        | -0.43160766 | -0.84293406 | -0.90263577 |

Table S5

|              |             |             |             |
|--------------|-------------|-------------|-------------|
| TBX3         | -0.63799608 | -0.84108221 | -0.96479587 |
| TRIM55       | -0.41269109 | -0.84011324 | -1.14649365 |
| SLC22A25     | -0.61387539 | -0.83916424 | -0.91455095 |
| RBP4         | -0.83168116 | -0.72002451 | -1.58098516 |
| RP11-6B4.1   | -0.48612421 | -0.82930402 | -1.48049229 |
| PRODH2       | -0.82671595 | -0.78277324 | -1.50147134 |
| CXXC4        | -0.49948404 | -0.82209373 | -1.0180244  |
| ORM2         | -0.48125488 | -0.82026193 | -0.88757303 |
| CNPY3        | -0.81711475 | -0.71387346 | -1.11737049 |
| PPP1R32      | -0.81701208 | -0.54806826 | -1.5146204  |
| FITM1        | -0.6639242  | -0.81316963 | -0.9421442  |
| C1orf226     | -0.72632656 | -0.81225523 | -1.51134647 |
| PDLIM1P4     | -0.44372511 | -0.81068592 | -1.17054558 |
| C3P1         | -0.67831697 | -0.80805497 | -1.29270777 |
| ETNK2        | -0.80482527 | -0.67150957 | -1.39308408 |
| CES1P1       | -0.79369268 | -0.80408941 | -1.17463066 |
| NAGS         | -0.80097203 | -0.71944772 | -1.24758996 |
| ZGPAT        | -0.79965053 | -0.51234221 | -1.04955075 |
| FADS6        | -0.73288221 | -0.79342869 | -1.35845648 |
| HAO2-IT1     | -0.59955733 | -0.79336794 | -1.43827604 |
| MAGI2-AS3    | -0.35584842 | -0.78285799 | -0.53918388 |
| SLC7A9       | -0.78097086 | -0.76962553 | -1.26189777 |
| GFRA1        | -0.55440634 | -0.78061658 | -1.06561411 |
| CTD-2529O2   | -0.53112617 | -0.78012415 | -1.00553518 |
| MEX3A        | -0.522985   | -0.77832605 | -0.90958064 |
| TYK2         | -0.65803804 | -0.7777852  | -0.73737827 |
| MOGAT2       | -0.71494902 | -0.77733915 | -1.48521321 |
| SMO          | -0.69834739 | -0.77436359 | -1.23571814 |
| RP11-475O6   | -0.49405245 | -0.77418792 | -0.79077968 |
| RP11-115J16  | -0.55973102 | -0.77241533 | -1.26192931 |
| ALDH1L1-AS   | -0.63925942 | -0.77040614 | -1.27061083 |
| WFIKKN1      | -0.76945835 | -0.60842709 | -1.22210899 |
| FAM35BP      | -0.72495655 | -0.76611146 | -1.52823847 |
| RP11-38L15.8 | -0.72495294 | -0.76610895 | -1.52823932 |
| SERPINC1     | -0.64231174 | -0.75788513 | -1.26126948 |
| GPER1        | -0.73874659 | -0.7562845  | -1.22583216 |
| FAM99B       | -0.75424502 | -0.63999416 | -1.12890307 |
| TSC2         | -0.75369796 | -0.6199147  | -0.99065949 |
| RP11-122K13  | -0.75356381 | -0.54125037 | -1.26026251 |
| PRAP1        | -0.75356381 | -0.54125041 | -1.26026272 |
| FUOM         | -0.75356381 | -0.54125046 | -1.26026303 |
| CHAD         | -0.74741586 | -0.49513365 | -1.22492178 |
| APOC2        | -0.7450738  | -0.54355247 | -1.3219583  |
| SLCO1B3      | -0.58591714 | -0.7442032  | -1.29189172 |
| ALDH1L1      | -0.59999491 | -0.74407132 | -1.20941092 |
| FMO3         | -0.49424232 | -0.74299001 | -1.27893186 |
| TM6SF2       | -0.73970533 | -0.62457193 | -1.41735459 |
| RP11-7F17.3  | -0.73628466 | -0.7269955  | -0.68819543 |
| RP11-830F9.5 | -0.7359723  | -0.57756223 | -1.39860393 |

Table S5

|              |             |             |             |
|--------------|-------------|-------------|-------------|
| RP11-119D9.  | -0.66797538 | -0.73584138 | -1.46102738 |
| ECHDC3       | -0.73574499 | -0.64695488 | -0.91347761 |
| GJB1         | -0.73271966 | -0.71216975 | -1.46182153 |
| GSTA7P       | -0.69554599 | -0.72836277 | -1.21399129 |
| C11orf95     | -0.66759182 | -0.72831986 | -1.09604871 |
| LINC01018    | -0.72663526 | -0.4670925  | -0.81163689 |
| CTD-2227E11  | -0.72581509 | -0.72646364 | -1.27667558 |
| HAGH         | -0.7241312  | -0.56129832 | -1.15793053 |
| RP11-372E1.  | -0.48838126 | -0.72382996 | -1.17599186 |
| RP11-706C16  | -0.72151361 | -0.67126525 | -0.99592848 |
| JAKMIP2      | -0.59190911 | -0.71988615 | -1.42416667 |
| AP006216.5   | -0.71728566 | -0.60883583 | -1.47977504 |
| HPX          | -0.53134133 | -0.71341157 | -0.96152571 |
| ALB          | -0.61593953 | -0.71214067 | -1.56518342 |
| RP5-881L22.6 | -0.71205592 | -0.62633386 | -1.35445049 |
| PLEK2        | -0.58279018 | -0.71204221 | -1.04019715 |
| HGFAC        | -0.51325387 | -0.71165281 | -0.83038664 |
| ASB13        | -0.70086639 | -0.71154238 | -1.03620588 |
| GSTA1        | -0.71032899 | -0.64856362 | -1.63938641 |
| DGAT2        | -0.70679534 | -0.70974109 | -1.32097732 |
| NAT1         | -0.70961995 | -0.68535333 | -1.44484818 |
| RP1-152L7.5  | -0.60024854 | -0.7088288  | -0.99394527 |
| GALK1        | -0.6524941  | -0.70208265 | -0.49504543 |
| RP11-260M19  | -0.7011436  | -0.6485646  | -1.68136973 |
| AC005077.7   | -0.46807058 | -0.7006907  | -1.3572382  |
| EFNA2        | -0.49300466 | -0.69998303 | -0.78766583 |
| LYNX1        | -0.69971324 | -0.67462418 | -0.85900698 |
| C10orf11     | -0.29734433 | -0.69480888 | -0.91639045 |
| RP11-659E9.  | -0.66184955 | -0.69454529 | -1.22709775 |
| CECR2        | -0.54792984 | -0.69282446 | -1.30188277 |
| APOA5        | -0.68897857 | -0.46835311 | -1.1386494  |
| INS-IGF2     | -0.68669973 | -0.61636774 | -0.86849906 |
| SLC10A1      | -0.68208719 | -0.60260581 | -1.37614137 |
| TMPRSS6      | -0.67892758 | -0.46227989 | -1.17699527 |
| CTC-575D19.  | -0.50301008 | -0.67783699 | -1.06299641 |
| SCP2         | -0.54729091 | -0.67775912 | -1.13600658 |
| NR1I2        | -0.67700905 | -0.62030923 | -1.42465198 |
| ABAT         | -0.33331643 | -0.67659891 | -0.72997478 |
| ECHDC2       | -0.54473282 | -0.67350042 | -1.13276754 |
| PON3         | -0.58047417 | -0.6721999  | -1.10846031 |
| HAO2         | -0.58929896 | -0.6716787  | -1.3346332  |
| SLC22A7      | -0.66730949 | -0.51135093 | -1.36656471 |
| SLC9A3R2     | -0.66600375 | -0.49863254 | -1.0694313  |
| GRHPR        | -0.6657719  | -0.47558544 | -1.21535632 |
| PLG          | -0.52855394 | -0.66518177 | -1.24898605 |
| AZGP1        | -0.62395669 | -0.66494299 | -0.91606595 |
| PCSK9        | -0.60364697 | -0.66493919 | -1.1202445  |
| NTHL1        | -0.66491983 | -0.49255849 | -1.07051067 |
| APOE         | -0.66305233 | -0.48365476 | -1.08114481 |

Table S5

|              |             |             |             |
|--------------|-------------|-------------|-------------|
| F2           | -0.46835274 | -0.66110168 | -0.6426977  |
| DFFB         | -0.61016315 | -0.66016317 | -0.75920127 |
| MFSD3        | -0.65447539 | -0.44261957 | -0.98623709 |
| GPT          | -0.65447539 | -0.44261959 | -0.98623703 |
| SMLR1        | -0.52661369 | -0.6541607  | -1.28901917 |
| PPP1R1C      | -0.48262948 | -0.65398528 | -1.08084799 |
| SULT1A1      | -0.65307806 | -0.54881671 | -1.05816353 |
| SLC25A34     | -0.65212305 | -0.54308214 | -1.21652379 |
| MGMT         | -0.46699718 | -0.65200609 | -0.80783134 |
| ZNF511       | -0.65139548 | -0.4622824  | -0.97964713 |
| TMEM105      | -0.55302581 | -0.65100671 | -0.69742329 |
| HSD17B10     | -0.65077375 | -0.54606299 | -0.86262797 |
| RP3-339A18.  | -0.65077365 | -0.54606314 | -0.86262813 |
| SERPINF2     | -0.61094679 | -0.65017548 | -0.90880042 |
| FBLN7        | -0.65001246 | -0.38974033 | -0.84264616 |
| SLC39A5      | -0.64976858 | -0.55007742 | -1.42634813 |
| RP13-650J16  | -0.6478358  | -0.3982245  | -0.86330101 |
| DCXR         | -0.64783579 | -0.39822448 | -0.86330123 |
| TPCN2        | -0.64773178 | -0.59461018 | -0.81270808 |
| PON1         | -0.59295438 | -0.64760568 | -1.22346607 |
| FAHD1        | -0.64633858 | -0.48634266 | -1.06892258 |
| AZGP1P2      | -0.64485418 | -0.53287999 | -1.03790934 |
| TRABD2B      | -0.47722253 | -0.64321508 | -1.0477239  |
| C2orf72      | -0.5594156  | -0.6418142  | -1.05957748 |
| GNA11        | -0.57685342 | -0.64092872 | -0.62347579 |
| HAAO         | -0.6387934  | -0.45134397 | -1.04918518 |
| THAP3        | -0.50147004 | -0.63719817 | -0.68699359 |
| SLC38A3      | -0.63662377 | -0.36577035 | -1.26974708 |
| AP006285.7   | -0.63650096 | -0.51105337 | -1.14691945 |
| RP11-223I10. | -0.57321173 | -0.6353221  | -1.12373571 |
| MSRB1        | -0.4839175  | -0.63462722 | -0.80628716 |
| SEMA4G       | -0.63420912 | -0.46527582 | -1.34926534 |
| UGT2B7       | -0.34735527 | -0.63379328 | -1.07350275 |
| COL18A1      | -0.633764   | -0.48613968 | -0.95981257 |
| TTR          | -0.60446147 | -0.63364811 | -1.51161646 |
| GC           | -0.29478957 | -0.6335266  | -0.91682405 |
| SLC6A12      | -0.6333656  | -0.45859746 | -1.29275872 |
| HPGD         | -0.4128829  | -0.63133765 | -0.96652053 |
| SKP2         | -0.35220983 | -0.62910207 | -0.89282635 |
| LCAT         | -0.62813838 | -0.51929613 | -0.91120887 |
| TP53I13      | -0.62703429 | -0.37204121 | -0.55580171 |
| CES3         | -0.58736479 | -0.626415   | -1.22109327 |
| KLF15        | -0.62635639 | -0.45928035 | -0.88625961 |
| HSD17B6      | -0.52637047 | -0.62578294 | -1.09214608 |
| MASP2        | -0.62540411 | -0.45429021 | -0.8030727  |
| FTCD         | -0.62522253 | -0.38500405 | -0.92207527 |
| ABCC6P1      | -0.62509976 | -0.38452141 | -1.2908723  |
| TDO2         | -0.35564566 | -0.62458298 | -0.89964827 |
| PSAT1        | -0.54753136 | -0.62300561 | -0.78303332 |

Table S5

|             |             |             |             |
|-------------|-------------|-------------|-------------|
| AC016768.1  | -0.38420885 | -0.62272919 | -1.08430264 |
| ESRP2       | -0.6218496  | -0.48248855 | -0.95106257 |
| REXO1       | -0.56277739 | -0.62150134 | -0.865069   |
| WNK3        | -0.62106763 | -0.34570911 | -0.68593648 |
| GYS2        | -0.41303876 | -0.62103511 | -1.16140983 |
| SULT1A2     | -0.62028062 | -0.48991151 | -1.03461752 |
| TOMM40      | -0.61989376 | -0.43165585 | -0.93937417 |
| GRB14       | -0.4458305  | -0.61988769 | -1.03073991 |
| ALDH7A1     | -0.46238695 | -0.61876846 | -0.87211003 |
| SEC14L4     | -0.61755403 | -0.41089817 | -1.19215269 |
| MLXIPL      | -0.6175478  | -0.54816044 | -0.98229235 |
| RAC3        | -0.61724767 | -0.35175161 | -0.78326802 |
| NUGGC       | -0.44890558 | -0.61652604 | -1.02383009 |
| RTP3        | -0.61626652 | -0.54756019 | -1.32674011 |
| CES1        | -0.61619799 | -0.41731858 | -1.21693951 |
| RFNG        | -0.61435967 | -0.50350499 | -0.74124704 |
| GPS1        | -0.61435961 | -0.50350491 | -0.74124734 |
| PPP1R16A    | -0.61345434 | -0.41105207 | -0.93078596 |
| TTBK1       | -0.60395821 | -0.61324208 | -1.17563254 |
| KLHDC10     | -0.61303155 | -0.60010566 | -1.5872218  |
| RP5-834N19. | -0.51365436 | -0.61200935 | -1.27007645 |
| GAMT        | -0.61187939 | -0.36664478 | -0.71033291 |
| IYD         | -0.50358548 | -0.61132638 | -1.12877964 |
| MPST        | -0.6108748  | -0.54581605 | -1.13556656 |
| RP11-418J17 | -0.57473442 | -0.61052084 | -1.21267473 |
| CPN2        | -0.48459523 | -0.6103631  | -0.79009217 |
| PSMB7       | -0.40820418 | -0.61021229 | -0.83422211 |
| SPP2        | -0.56862656 | -0.60999811 | -0.92182258 |
| HFE2        | -0.46933974 | -0.60889644 | -0.85388126 |
| DMRTA1      | -0.51210504 | -0.60876512 | -1.07467166 |
| SORD        | -0.58079901 | -0.60821283 | -1.00300526 |
| XAB2        | -0.60789085 | -0.53251592 | -0.91315249 |
| GPRC5C      | -0.60748968 | -0.58039232 | -1.06113179 |
| ACOT6       | -0.60734884 | -0.41927042 | -0.81412779 |
| NRBP2       | -0.6050793  | -0.55679106 | -0.85775185 |
| ABCC11      | -0.40158633 | -0.60456873 | -0.82618026 |
| PGRMC1      | -0.47252679 | -0.60425638 | -0.96098919 |
| FES         | -0.42565685 | -0.60271729 | -0.49213319 |
| TMEM176A    | -0.46405227 | -0.60127865 | -0.6353846  |
| MBL2        | -0.53147691 | -0.60088917 | -1.25572526 |
| SLC16A2     | -0.33244141 | -0.60064312 | -0.56853879 |
| ADH1B       | -0.43132286 | -0.60005989 | -1.19573949 |
| TDGF1       | -0.41829492 | -0.59947195 | -0.94450355 |
| ACSM5       | -0.4846508  | -0.59940731 | -1.11552476 |
| DHTKD1      | -0.59913906 | -0.4510699  | -1.06624861 |
| ANPEP       | -0.39222731 | -0.59797437 | -0.87571829 |
| AP000695.6  | -0.59793891 | -0.58609996 | -1.28444227 |
| TMEM110-MU  | -0.48091903 | -0.59739318 | -0.73701587 |
| MIR3646     | -0.5959499  | -0.52518315 | -1.14348719 |

Table S5

|             |             |             |             |
|-------------|-------------|-------------|-------------|
| NUDC        | -0.59416921 | -0.54419999 | -0.89742284 |
| TMEM176B    | -0.45821951 | -0.59377894 | -0.62598657 |
| DGAT1       | -0.59367306 | -0.38374643 | -0.75238443 |
| ASGR2       | -0.57713067 | -0.59260218 | -1.03735592 |
| NLRP14      | -0.47829452 | -0.59257624 | -0.80707851 |
| RAVER1      | -0.58965445 | -0.56794636 | -0.59136094 |
| RAPSN       | -0.44810686 | -0.58914135 | -0.91178852 |
| KHK         | -0.58850678 | -0.47178375 | -0.96758288 |
| NBPF13P     | -0.52308524 | -0.58820299 | -1.01997984 |
| SLC43A1     | -0.58716714 | -0.48673092 | -0.99146427 |
| HNF1A       | -0.58703441 | -0.43191851 | -1.30314598 |
| PQLC1       | -0.51128552 | -0.58518879 | -0.87524015 |
| LRRC3       | -0.58506819 | -0.33908631 | -0.96210778 |
| LRRC3-AS1   | -0.58506818 | -0.33908633 | -0.96210767 |
| CHID1       | -0.52113529 | -0.58487534 | -0.85719333 |
| KLKB1       | -0.49699917 | -0.58477479 | -1.12678624 |
| HSD17B14    | -0.58311868 | -0.52414515 | -0.8902756  |
| MGST1       | -0.44586517 | -0.58266921 | -1.18824352 |
| ARID3C      | -0.58266304 | -0.51941336 | -1.20230419 |
| CAT         | -0.58201229 | -0.48705715 | -1.24993905 |
| RP11-252E2. | -0.58143053 | -0.56129588 | -1.04494071 |
| ACOX2       | -0.5805449  | -0.51146067 | -1.20268726 |
| RP11-696N14 | -0.44797812 | -0.58037082 | -1.23646599 |
| GLYAT       | -0.41431923 | -0.57973952 | -0.97656553 |
| NR2F6       | -0.5793919  | -0.40638654 | -0.86113452 |
| C1orf115    | -0.49538995 | -0.57895323 | -0.77655932 |
| SNED1       | -0.57740037 | -0.40034854 | -0.80600899 |
| SCG5        | -0.50820222 | -0.57715739 | -0.9681705  |
| NIT2        | -0.52382134 | -0.57681417 | -1.11724769 |
| TST         | -0.57610113 | -0.47748132 | -1.06213664 |
| GGACT       | -0.29750282 | -0.57565388 | -0.67641995 |
| GSTZ1       | -0.57416671 | -0.49594461 | -0.85040604 |
| MRPL43      | -0.57393552 | -0.38562571 | -1.12234897 |
| SLC27A5     | -0.57384955 | -0.36274605 | -0.80451704 |
| BCAT2       | -0.57362287 | -0.4821496  | -0.7995547  |
| POLE        | -0.5734815  | -0.36457824 | -0.93992892 |
| SERPINA4    | -0.45149394 | -0.57326362 | -0.99086094 |
| ABCG8       | -0.57311013 | -0.43992538 | -1.26841747 |
| TEF         | -0.57245391 | -0.41824675 | -0.83097713 |
| LBX2        | -0.54741405 | -0.571731   | -0.90272755 |
| LBX2-AS1    | -0.54741406 | -0.57173079 | -0.90272749 |
| RP11-523H20 | -0.54741405 | -0.57173062 | -0.90272723 |
| BPHL        | -0.37664424 | -0.57086038 | -0.7983163  |
| PACSLIN3    | -0.51016493 | -0.569775   | -0.64726667 |
| ASPG        | -0.5695377  | -0.44994196 | -0.86705129 |
| SERPINA5    | -0.37963361 | -0.56949765 | -0.91182953 |
| CA14        | -0.56920372 | -0.47864338 | -1.22421002 |
| GGH         | -0.30389191 | -0.56847041 | -0.64654806 |
| AKR1D1      | -0.46639569 | -0.56766263 | -1.01148044 |

Table S5

|              |             |             |             |
|--------------|-------------|-------------|-------------|
| HNF1A-AS1    | -0.56746377 | -0.42809642 | -1.30517466 |
| PKD1         | -0.56703768 | -0.35638666 | -0.47364936 |
| C8orf82      | -0.56627989 | -0.3824422  | -0.5843929  |
| TTC36        | -0.55970467 | -0.56589728 | -1.0625555  |
| CLDN14       | -0.51014848 | -0.5653727  | -1.17478053 |
| PROC         | -0.46263394 | -0.56342543 | -0.99796948 |
| HNF4A        | -0.56170072 | -0.52228426 | -1.07535176 |
| KCTD21-AS1   | -0.37965635 | -0.56160309 | -0.77831421 |
| NDUFA6-AS1   | -0.56092034 | -0.38097628 | -0.70455877 |
| IVD          | -0.56033217 | -0.43510994 | -0.89456359 |
| SLC25A10     | -0.55948616 | -0.36553108 | -0.816684   |
| CBS          | -0.55818014 | -0.49263627 | -0.8766665  |
| FTCDNL1      | -0.55759976 | -0.42851501 | -0.95304218 |
| TMEM25       | -0.53650468 | -0.55661602 | -1.08942415 |
| POMT2        | -0.55575725 | -0.47829184 | -0.82869173 |
| SLC19A1      | -0.55514766 | -0.39980198 | -0.80950827 |
| AK4          | -0.37776613 | -0.55510821 | -1.02536262 |
| MOGAT1       | -0.46931272 | -0.55422142 | -1.13492849 |
| PCYT2        | -0.55361709 | -0.37385382 | -0.70887121 |
| RP4-758J18.2 | -0.55342691 | -0.33293506 | -0.63949736 |
| CCNL2        | -0.5534269  | -0.33293503 | -0.63949793 |
| GNAO1        | -0.40709817 | -0.55335288 | -0.75878787 |
| SAT2         | -0.55328098 | -0.32899268 | -0.93540646 |
| NUDT16       | -0.49638324 | -0.55146716 | -0.78020807 |
| SELO         | -0.55049531 | -0.42967262 | -0.81287698 |
| TMEM110      | -0.4523131  | -0.54941938 | -0.79112255 |
| AMBP         | -0.5332563  | -0.54935059 | -1.14020971 |
| PHGDH        | -0.39295342 | -0.54867972 | -1.02306075 |
| ALKBH2       | -0.53423372 | -0.54812573 | -1.05512027 |
| XYLB         | -0.54782416 | -0.46845163 | -1.04680177 |
| TTC31        | -0.54772171 | -0.40042391 | -1.00386554 |
| C1R          | -0.36476152 | -0.54761051 | -0.46689801 |
| STEAP3       | -0.37738984 | -0.54733639 | -0.7956582  |
| PMM1         | -0.54627888 | -0.28253201 | -0.66711584 |
| C16orf13     | -0.54570672 | -0.32688719 | -0.59900216 |
| ITIH1        | -0.44793049 | -0.54564737 | -0.706061   |
| SHMT2        | -0.54552397 | -0.52298954 | -0.63145113 |
| SH3PXD2A     | -0.44187639 | -0.54539559 | -0.59425315 |
| ASL          | -0.54456235 | -0.52231389 | -0.88822704 |
| NDUFS7       | -0.54417121 | -0.29338413 | -0.57657413 |
| TCEA3        | -0.45619391 | -0.54341951 | -0.89797486 |
| SUGP1        | -0.54098686 | -0.44638745 | -0.86721951 |
| VTN          | -0.54075469 | -0.443821   | -0.95154547 |
| ECHS1        | -0.54056713 | -0.41448155 | -0.90503175 |
| MRPL23       | -0.53932617 | -0.50045197 | -0.79114635 |
| AGXT2        | -0.32841234 | -0.53910873 | -0.78881058 |
| SLC25A42     | -0.53807907 | -0.36450899 | -0.89628915 |
| MARC1        | -0.38312721 | -0.53739454 | -0.90228423 |
| ELP3         | -0.36883554 | -0.53613072 | -0.88042234 |



Table S5

|             |             |             |             |
|-------------|-------------|-------------|-------------|
| TMEM37      | -0.3196043  | -0.53540935 | -0.7913224  |
| GULOP       | -0.53516416 | -0.40178378 | -1.11734343 |
| ASPSCR1     | -0.53480527 | -0.32653753 | -0.72998491 |
| GNE         | -0.45806797 | -0.53442947 | -0.86996148 |
| SLC25A18    | -0.50350814 | -0.53424868 | -0.88496182 |
| SLC46A1     | -0.53407199 | -0.42455711 | -1.08035573 |
| SFXN5       | -0.496014   | -0.53339116 | -0.98794406 |
| ICAM3       | -0.5330691  | -0.47745957 | -0.51935567 |
| TTPAL       | -0.53285799 | -0.4357361  | -0.81143695 |
| CTNS        | -0.53240924 | -0.37648291 | -0.64363691 |
| PRKAG2-AS1  | -0.5310375  | -0.31160358 | -0.76549028 |
| ABCG5       | -0.5300833  | -0.41424045 | -1.2093052  |
| PROZ        | -0.52983523 | -0.46086358 | -1.03298731 |
| SUOX        | -0.47224945 | -0.52936307 | -0.91488826 |
| SPTBN2      | -0.41482506 | -0.52846757 | -0.96881172 |
| CASC10      | -0.46069097 | -0.52801376 | -1.1426007  |
| LCN12       | -0.52755957 | -0.2416872  | -0.54321365 |
| C8G         | -0.52755957 | -0.2416872  | -0.54321388 |
| SIGMAR1     | -0.52753124 | -0.29635608 | -0.60557434 |
| MLYCD       | -0.52746589 | -0.40467836 | -0.61196955 |
| CPPED1      | -0.45585123 | -0.52692497 | -0.9475356  |
| ABCC2       | -0.33069775 | -0.526547   | -0.85135036 |
| HPN         | -0.52571552 | -0.45549562 | -0.86362217 |
| PKLR        | -0.52544006 | -0.47379075 | -1.21718597 |
| RAD54L2     | -0.52459046 | -0.48270611 | -1.00880205 |
| RP5-875H18. | -0.52423609 | -0.39216451 | -1.00091568 |
| RP11-1151B1 | -0.39617577 | -0.51550649 | -0.89295859 |
| TMEM220     | -0.44426325 | -0.51422255 | -0.93400535 |
| TADA1       | -0.51288083 | -0.42028579 | -1.04071106 |
| ASGR1       | -0.5127561  | -0.48431379 | -0.80798876 |
| DOLPP1      | -0.51267896 | -0.41169338 | -0.7954908  |
| FXD1        | -0.51259674 | -0.34985605 | -0.76054743 |
| PCK2        | -0.51153711 | -0.38174507 | -0.70490079 |
| DHRS4       | -0.51151351 | -0.35312145 | -0.97458936 |
| PGLYRP2     | -0.51129907 | -0.43756266 | -1.05658469 |
| LPAL2       | -0.47613199 | -0.51093138 | -1.11224317 |
| AC142528.1  | -0.50993273 | -0.47855001 | -0.94550876 |
| AGPAT2      | -0.50987929 | -0.50145303 | -0.70351539 |
| HIBADH      | -0.40473344 | -0.50932067 | -0.82656481 |
| RGS12       | -0.41474877 | -0.50878816 | -0.7105457  |
| TNFAIP8L1   | -0.50681237 | -0.31462028 | -0.67833792 |
| RP11-407B7. | -0.36462574 | -0.50655877 | -0.7214821  |
| DCTD        | -0.38206799 | -0.5062648  | -0.63171181 |
| MRPS22      | -0.42399493 | -0.50613564 | -0.85476713 |
| PAOX        | -0.50466519 | -0.27578744 | -0.48580766 |
| PAIP2B      | -0.50458813 | -0.43717477 | -0.60443857 |
| NDRG2       | -0.38817639 | -0.5029702  | -0.79425351 |
| PEMT        | -0.47849196 | -0.50282158 | -0.67136846 |
| ALDH8A1     | -0.30685945 | -0.50167267 | -0.85268204 |



Table S5

|             |             |             |             |
|-------------|-------------|-------------|-------------|
| TSSC1       | -0.41604199 | -0.50166131 | -0.49540256 |
| AP001065.15 | -0.50121439 | -0.43630473 | -0.76142614 |
| FGFR4       | -0.50079069 | -0.40955859 | -0.87405881 |
| ZNF444      | -0.49924193 | -0.47143732 | -0.97075247 |
| LINC00094   | -0.49907735 | -0.34613862 | -0.49621546 |
| FAM73B      | -0.49864561 | -0.41579389 | -0.78432955 |
| CTD-2545H1. | -0.49794342 | -0.4922324  | -1.17932551 |
| TFR2        | -0.49737757 | -0.40044049 | -0.77485704 |
| FLCN        | -0.49727171 | -0.39699181 | -0.74957097 |
| ACAA1       | -0.49691562 | -0.40187225 | -0.91459311 |
| FURIN       | -0.38736648 | -0.49665955 | -0.39939185 |
| ZNF696      | -0.49657629 | -0.3440484  | -0.74943043 |
| RNF126      | -0.49601691 | -0.33194009 | -0.35968452 |
| POLR3H      | -0.49517761 | -0.31785751 | -0.59884772 |
| GHR         | -0.32229072 | -0.49490278 | -0.90289188 |
| ACP2        | -0.49474027 | -0.46615352 | -0.90064104 |
| ZNF497      | -0.49442209 | -0.39183096 | -0.75072184 |
| ZBTB48      | -0.49401346 | -0.2997022  | -0.5774085  |
| FAM20C      | -0.49390927 | -0.46207081 | -0.84181712 |
| NAT8        | -0.4935748  | -0.42309711 | -1.06265905 |
| HPD         | -0.49355526 | -0.42777177 | -0.80696298 |
| ADI1        | -0.49351634 | -0.42814468 | -0.86973939 |
| SNHG8       | -0.30963332 | -0.49265941 | -0.65512481 |
| ZNF517      | -0.4917722  | -0.46460047 | -0.68957468 |
| EHHADH      | -0.41997315 | -0.49164704 | -0.9694181  |
| TBC1D2      | -0.44369124 | -0.49087881 | -0.8841199  |
| SFXN1       | -0.45312962 | -0.49081025 | -0.89746839 |
| FBXW11P1    | -0.42475793 | -0.49075521 | -1.23583592 |
| GALT        | -0.48939574 | -0.32661027 | -0.73469772 |
| MRPL20      | -0.48889795 | -0.29298016 | -0.52441066 |
| RP11-513G11 | -0.32566644 | -0.48866387 | -0.80234035 |
| ZBTB45      | -0.48783977 | -0.30485582 | -0.6774168  |
| EDC3        | -0.44603223 | -0.48753583 | -0.69459683 |
| AC009166.5  | -0.32444132 | -0.48751622 | -0.78666214 |
| PCBD1       | -0.48719245 | -0.39835197 | -0.66753121 |
| RP11-44M6.3 | -0.48716407 | -0.36623863 | -0.90546724 |
| LRRC37A5P   | -0.4311686  | -0.48715786 | -0.98487631 |
| OSGIN1      | -0.48661609 | -0.33313549 | -1.01632723 |
| TMEM82      | -0.48639705 | -0.40000723 | -1.09018766 |
| SLC26A1     | -0.48606527 | -0.39855654 | -0.77787135 |
| HSBP1L1     | -0.35304183 | -0.48601142 | -0.2797335  |
| ENTPD5      | -0.35027874 | -0.48523689 | -0.87672378 |
| BDH1        | -0.48419263 | -0.33955255 | -0.88889941 |
| SLC25A20    | -0.48393904 | -0.34051564 | -0.81635543 |
| MPLKIP      | -0.48304731 | -0.40127274 | -0.84812195 |
| SOWAHB      | -0.46464072 | -0.48157392 | -0.8494645  |
| CYP27A1     | -0.41327242 | -0.48118186 | -0.88738579 |
| IL11RA      | -0.4798205  | -0.3337762  | -0.78763639 |
| SLC27A2     | -0.44706769 | -0.47901059 | -0.88428141 |

Table S5

|             |             |             |             |
|-------------|-------------|-------------|-------------|
| ZNF385B     | -0.33023531 | -0.47848627 | -1.1121292  |
| DEAF1       | -0.47796184 | -0.36825415 | -0.71320419 |
| POLR2F      | -0.47774132 | -0.33296713 | -0.91244513 |
| MMACHC      | -0.47712778 | -0.41091257 | -0.91635424 |
| RP11-344P13 | -0.39852927 | -0.47679292 | -1.09817688 |
| HDHD3       | -0.44181024 | -0.47659129 | -1.13296142 |
| FABP1       | -0.30753758 | -0.47627108 | -0.65808125 |
| SCCPDH      | -0.45745009 | -0.47546018 | -0.88128234 |
| TTC38       | -0.474034   | -0.28784079 | -0.61003563 |
| CFB         | -0.35693341 | -0.47336005 | -0.50191683 |
| MTHFD1      | -0.46427643 | -0.47210587 | -0.97478558 |
| CYP8B1      | -0.32041968 | -0.47112259 | -0.76499247 |
| TRIM24      | -0.40642724 | -0.46963243 | -0.71833726 |
| PEX6        | -0.46908041 | -0.33063488 | -0.40046953 |
| BTD         | -0.38310231 | -0.46782556 | -0.98352895 |
| SLC6A1      | -0.46749302 | -0.33398139 | -0.96537532 |
| RANBP1      | -0.46739615 | -0.34553256 | -0.56922529 |
| RP11-38G5.4 | -0.44114597 | -0.4670968  | -0.83228655 |
| TOLLIP      | -0.4670631  | -0.37155505 | -0.75223401 |
| LGI4        | -0.46690066 | -0.30048316 | -0.67703694 |
| RP11-209K10 | -0.35233705 | -0.46683615 | -1.01633402 |
| OPLAH       | -0.44651345 | -0.46490928 | -0.80120844 |
| EI24        | -0.46454905 | -0.3812715  | -0.69351012 |
| CYP4F11     | -0.4083028  | -0.46418502 | -0.89620285 |
| WDR18       | -0.40553702 | -0.46347861 | -0.5464171  |
| TOLLIP-AS1  | -0.463264   | -0.37064645 | -0.75023903 |
| USP30       | -0.45958095 | -0.46283748 | -0.87902466 |
| ACACB       | -0.35797062 | -0.46176925 | -0.83227568 |
| AHCY        | -0.4064863  | -0.46103644 | -0.67416827 |
| ABCC6       | -0.43846415 | -0.45989323 | -1.04522525 |
| GLS2        | -0.45963971 | -0.27880136 | -0.91114051 |
| AC019181.2  | -0.39783467 | -0.45961561 | -0.78812387 |
| F10         | -0.45882069 | -0.36950754 | -0.57993411 |
| ZKSCAN1     | -0.39867916 | -0.45840621 | -0.85685556 |
| ADCY1       | -0.45809579 | -0.37976781 | -0.92375978 |
| CHMP6       | -0.42696208 | -0.4575594  | -0.59055523 |
| SEC14L2     | -0.43225002 | -0.45577579 | -0.79066105 |
| C7orf50     | -0.45567089 | -0.36783366 | -0.6781544  |
| FAH         | -0.36603446 | -0.45532692 | -0.68099693 |
| CLUH        | -0.45525342 | -0.26882068 | -0.77884093 |
| PPP6R2      | -0.45511075 | -0.25961048 | -0.81276072 |
| C1S         | -0.27588469 | -0.45447322 | -0.48758785 |
| FANCC       | -0.28011776 | -0.45402927 | -0.59514464 |
| SLC25A13    | -0.45387704 | -0.43150595 | -1.05224    |
| RNF215      | -0.45336741 | -0.45261625 | -0.82976956 |
| LHPP        | -0.45207122 | -0.33877499 | -0.57478778 |
| TFDP2       | -0.45187246 | -0.39525617 | -0.72002289 |
| KDM8        | -0.39823294 | -0.45164846 | -0.75529104 |
| ACSF2       | -0.45161505 | -0.28630564 | -0.78922227 |

Table S5

|             |             |             |             |
|-------------|-------------|-------------|-------------|
| RAB26       | -0.45154017 | -0.29370101 | -0.65528094 |
| AL161668.5  | -0.4499014  | -0.32396975 | -0.6672811  |
| TPPP2       | -0.44990139 | -0.3239697  | -0.66728126 |
| IPO5        | -0.26741723 | -0.44948608 | -0.33905207 |
| ZC3H7B      | -0.44913537 | -0.3385584  | -0.74458735 |
| RP4-584D14. | -0.3750442  | -0.44912805 | -0.52521848 |
| RARRES2     | -0.3750443  | -0.44912805 | -0.52521811 |
| POLM        | -0.44893481 | -0.29853335 | -0.54991727 |
| GPR146      | -0.44865796 | -0.38895443 | -0.82860245 |
| MOCS1       | -0.41773577 | -0.44792101 | -0.47232545 |
| SERPIND1    | -0.36698026 | -0.44786657 | -0.61587455 |
| TACO1       | -0.44688164 | -0.37216997 | -0.69124991 |
| FAAH        | -0.44572098 | -0.40437451 | -0.96122516 |
| SLC22A1     | -0.35592978 | -0.44505431 | -0.78689849 |
| PUF60       | -0.44404391 | -0.29095008 | -0.60675334 |
| GLYCTK      | -0.44377755 | -0.35026885 | -0.74176818 |
| ARFGAP2     | -0.44372545 | -0.35288168 | -0.5183326  |
| PXMP2       | -0.4433802  | -0.24999398 | -0.49449295 |
| RAB40C      | -0.44330146 | -0.31355658 | -0.61868624 |
| PPL         | -0.4315543  | -0.44327275 | -0.88450575 |
| ESD         | -0.39666646 | -0.44284912 | -0.94472626 |
| DECR2       | -0.3407892  | -0.44198449 | -0.43197355 |
| ARMC6       | -0.44171579 | -0.38459195 | -0.65195642 |
| POLE2       | -0.43139487 | -0.44093522 | -0.91510974 |
| SP5         | -0.43825549 | -0.42995769 | -0.95133296 |
| AP1M1       | -0.42285109 | -0.43687256 | -0.70823326 |
| RP11-736K20 | -0.35310608 | -0.43597212 | -0.73476085 |
| PITPNM2     | -0.43183173 | -0.40867964 | -0.69491797 |
| SCLY        | -0.40008884 | -0.43091631 | -0.67233199 |
| OAF         | -0.33562809 | -0.43048654 | -0.52222125 |
| ALDH4A1     | -0.28716605 | -0.43042383 | -0.57941302 |
| ARRDC1      | -0.43038866 | -0.31724026 | -0.48039866 |
| KCTD21      | -0.33341511 | -0.43004666 | -0.56652908 |
| RP11-273B20 | -0.42903237 | -0.38342987 | -0.59997147 |
| RBP5        | -0.42903235 | -0.38342977 | -0.59997146 |
| AKT2        | -0.42725154 | -0.30639023 | -0.61921373 |
| DHRS1       | -0.31698678 | -0.42714246 | -0.53697984 |
| LDHD        | -0.42515427 | -0.42699012 | -0.7034379  |
| CNGA1       | -0.4261871  | -0.37338182 | -0.77648303 |
| GPD1        | -0.42512576 | -0.33581025 | -0.76336898 |
| EEF1D       | -0.42455967 | -0.27087658 | -0.42517199 |
| RNF43       | -0.33079245 | -0.42327577 | -0.89362159 |
| SND1        | -0.41353442 | -0.42320194 | -0.77226424 |
| STARD10     | -0.42288169 | -0.30011581 | -0.74448099 |
| UNC119B     | -0.2635271  | -0.42255029 | -0.38503247 |
| CYP4F2      | -0.36909994 | -0.42188912 | -0.95761928 |
| RAPGEFL1    | -0.42174714 | -0.38579213 | -0.5904051  |
| CCS         | -0.42145656 | -0.35268149 | -0.66042388 |
| RABEPK      | -0.25830292 | -0.42060896 | -0.48140481 |

Table S5

|              |             |             |             |
|--------------|-------------|-------------|-------------|
| SLC25A1      | -0.42051755 | -0.29538267 | -0.65096155 |
| XRCC5        | -0.41252298 | -0.42007243 | -0.85869258 |
| AC091729.9   | -0.41998922 | -0.30812968 | -0.37373999 |
| FAM50B       | -0.24568531 | -0.41974922 | -0.42371236 |
| KIAA1161     | -0.41780651 | -0.31125164 | -0.891638   |
| ORAI3        | -0.41675126 | -0.2260546  | -0.58435632 |
| RANBP10      | -0.41582233 | -0.35862083 | -0.73566028 |
| GGCX         | -0.41520765 | -0.4005541  | -0.77519467 |
| RAI14        | -0.28978227 | -0.41414754 | -0.5539635  |
| SEC24B       | -0.41410303 | -0.40612039 | -0.67144048 |
| DHRS4-AS1    | -0.41357542 | -0.28741066 | -0.78660351 |
| HGD          | -0.41354462 | -0.39801706 | -1.18739372 |
| AK2          | -0.33886441 | -0.41331637 | -0.58780769 |
| COMT         | -0.41291208 | -0.40673668 | -0.49299638 |
| IGSF8        | -0.41194622 | -0.35958714 | -0.50922044 |
| CNNM3        | -0.40992921 | -0.27139126 | -0.70842299 |
| CDA          | -0.36907875 | -0.40982203 | -0.73029612 |
| NIPSNAP1     | -0.40921439 | -0.27157182 | -0.81872222 |
| CDHR3        | -0.31811406 | -0.40828798 | -0.61844292 |
| CDKN2AIPNL   | -0.35830649 | -0.40812345 | -0.89898706 |
| PAQR9        | -0.40581813 | -0.34342162 | -0.79228759 |
| PGM1         | -0.29171942 | -0.40564516 | -0.8076083  |
| CLU          | -0.33992741 | -0.40451622 | -0.75963304 |
| METTL7B      | -0.40440387 | -0.36579102 | -0.73229483 |
| OGFR-AS1     | -0.40303212 | -0.28290761 | -0.44519288 |
| OGFR         | -0.40303194 | -0.28290762 | -0.44519288 |
| CNP          | -0.40300593 | -0.27696223 | -0.36756841 |
| SMARCD2      | -0.40191315 | -0.26016194 | -0.59692606 |
| SLC47A1      | -0.38887493 | -0.40078725 | -0.71852437 |
| MYH14        | -0.39185752 | -0.40078648 | -0.69769087 |
| ZNF3         | -0.39956344 | -0.29301597 | -0.64767987 |
| ACSL1        | -0.38375538 | -0.39712276 | -0.74197923 |
| CLDN15       | -0.2855084  | -0.39595715 | -0.47311667 |
| ZER1         | -0.39454397 | -0.33872364 | -0.72088244 |
| RP11-384L8.1 | -0.39319765 | -0.3070985  | -0.70805451 |
| CMTM8        | -0.39319761 | -0.30709859 | -0.70805567 |
| LRP1         | -0.29833253 | -0.39301776 | -0.39321886 |
| RNF220       | -0.36030039 | -0.39104117 | -0.51895713 |
| RP5-1033H22  | -0.30503081 | -0.39050236 | -0.70986193 |
| ECI2         | -0.39036176 | -0.30879026 | -0.56948546 |
| SIRT7        | -0.38972422 | -0.28326125 | -0.45282197 |
| FZD4         | -0.34499709 | -0.38933786 | -0.7584114  |
| SUV39H1      | -0.36971855 | -0.38888921 | -0.3864843  |
| CHST13       | -0.38814415 | -0.32402455 | -0.94292085 |
| NFIC         | -0.38801358 | -0.31715258 | -0.48538705 |
| SESN2        | -0.3709953  | -0.38782191 | -0.76977309 |
| AFMID        | -0.38774641 | -0.30584992 | -0.73841801 |
| NR0B2        | -0.36539925 | -0.38774243 | -0.77096257 |
| SLC12A7      | -0.38663084 | -0.27527243 | -0.53529289 |

Table S5

|             |             |             |             |
|-------------|-------------|-------------|-------------|
| CAPN5       | -0.34570202 | -0.38577686 | -0.54390858 |
| THRB-AS1    | -0.34943077 | -0.38575153 | -0.5143923  |
| ATXN7L1     | -0.26845327 | -0.38521028 | -0.61673041 |
| TALDO1      | -0.38502538 | -0.30703897 | -0.46847866 |
| DGCR8       | -0.38471087 | -0.3773287  | -0.60355174 |
| ATP5SL      | -0.31559414 | -0.38440531 | -0.52457057 |
| ZBTB42      | -0.38427243 | -0.2922977  | -0.32281231 |
| AKT1        | -0.38427243 | -0.29229771 | -0.32281232 |
| PANX2       | -0.38404028 | -0.36173835 | -0.45008437 |
| SHMT1       | -0.38348468 | -0.35373178 | -0.71994683 |
| F12         | -0.38308371 | -0.27951505 | -0.55149116 |
| NME4        | -0.32377865 | -0.38216429 | -0.36021388 |
| SLCO2B1     | -0.38122455 | -0.26391129 | -0.90927741 |
| RASSF7      | -0.3811343  | -0.293724   | -0.48160157 |
| RP11-655M14 | -0.38109626 | -0.26735602 | -0.44800183 |
| TBX10       | -0.38109598 | -0.26735594 | -0.44800149 |
| NUDT8       | -0.38109581 | -0.2673559  | -0.44800168 |
| PSMA7       | -0.38098092 | -0.29845841 | -0.52323397 |
| TRMT2A      | -0.38057839 | -0.22895339 | -0.30002095 |
| EEFSEC      | -0.34037015 | -0.38025914 | -0.55114867 |
| PEX16       | -0.37993452 | -0.33492077 | -0.53062024 |
| PARP10      | -0.37981547 | -0.21387565 | -0.4415198  |
| GRTP1       | -0.37814196 | -0.36530467 | -0.57313097 |
| HDLBP       | -0.37797755 | -0.3024235  | -0.36468023 |
| MAVS        | -0.37731114 | -0.36557947 | -0.39103586 |
| EPN1        | -0.37682644 | -0.27167571 | -0.65296429 |
| IRF2BP1     | -0.37674375 | -0.32099143 | -0.55874281 |
| TMEM80      | -0.37570265 | -0.24624656 | -0.48887233 |
| C16orf70    | -0.37492915 | -0.31083243 | -0.7472723  |
| SLC35D1     | -0.37436408 | -0.27595108 | -0.51086931 |
| SCAP        | -0.37369073 | -0.28496227 | -0.71196538 |
| ADCK3       | -0.29812925 | -0.37307645 | -0.55028308 |
| HSD11B2     | -0.3726025  | -0.31254558 | -0.63032933 |
| PHYH        | -0.3720753  | -0.33485628 | -0.43956866 |
| HOGA1       | -0.31742346 | -0.37107901 | -0.74538627 |
| RHCE        | -0.37080779 | -0.30171794 | -0.30824765 |
| AQP3        | -0.32343107 | -0.36985801 | -0.47924905 |
| LRR1        | -0.3287904  | -0.36848651 | -0.63086192 |
| SETD1A      | -0.36744264 | -0.23242592 | -0.54818192 |
| TMEM57      | -0.3357718  | -0.36739329 | -0.53543977 |
| EPS8L2      | -0.36492322 | -0.22369652 | -0.46949034 |
| AP000355.2  | -0.36480429 | -0.31196501 | -0.77861157 |
| GPAM        | -0.36443184 | -0.34811237 | -0.73563915 |
| FOXA3       | -0.36375897 | -0.29284569 | -0.54493768 |
| PIPOX       | -0.36276665 | -0.28074058 | -0.62529362 |
| EPHB4       | -0.33746387 | -0.36213718 | -0.69733417 |
| ANG         | -0.25749011 | -0.36109385 | -0.57078707 |
| NT5DC3      | -0.26949837 | -0.35751769 | -0.62502549 |
| WDR81       | -0.35673733 | -0.25774597 | -0.37305684 |

Table S5

|             |             |             |             |
|-------------|-------------|-------------|-------------|
| RP11-350G8. | -0.3543378  | -0.35485534 | -0.62108847 |
| CERS2       | -0.26745357 | -0.35404273 | -0.41326494 |
| GTF2IRD1    | -0.35349659 | -0.33576831 | -0.58765452 |
| PEX19       | -0.35337264 | -0.34915125 | -0.50655535 |
| AKAP1       | -0.35263918 | -0.29265316 | -0.54461459 |
| SH2D4A      | -0.25490705 | -0.35212954 | -0.59561929 |
| NR1H3       | -0.35210006 | -0.27146195 | -0.54058567 |
| PDIK1L      | -0.35204896 | -0.2829924  | -0.50072083 |
| ANXA9       | -0.26745198 | -0.35124338 | -0.40958112 |
| KANK2       | -0.35036754 | -0.3319646  | -0.38243988 |
| SHH         | -0.32551636 | -0.35032606 | -0.53739707 |
| TMEM101     | -0.33732052 | -0.34983763 | -0.61600529 |
| RXRA        | -0.34948675 | -0.28767448 | -0.48368668 |
| C1RL-AS1    | -0.34870299 | -0.3393696  | -0.43569585 |
| KIF1C       | -0.34811672 | -0.23372311 | -0.34784951 |
| IDNK        | -0.2652978  | -0.34799289 | -0.67952627 |
| ELK1        | -0.34650465 | -0.30471213 | -0.39580749 |
| IL6R        | -0.34129699 | -0.3463338  | -0.58491048 |
| NEIL1       | -0.34551526 | -0.32270888 | -0.64328877 |
| SERPINF1    | -0.34534084 | -0.33522948 | -0.64985492 |
| FCGRT       | -0.34444097 | -0.27204935 | -0.56575923 |
| AGFG2       | -0.34421296 | -0.29824866 | -0.70131317 |
| MUM1        | -0.34369254 | -0.32853246 | -0.3574704  |
| ABHD14A     | -0.34363545 | -0.23778997 | -0.39562106 |
| MLX         | -0.34239925 | -0.32670861 | -0.36319017 |
| ACY1        | -0.34232231 | -0.247427   | -0.39876477 |
| STARD5      | -0.3419298  | -0.31524065 | -0.33159342 |
| FZD5        | -0.25822211 | -0.3409676  | -0.47423842 |
| DCAF8       | -0.27681872 | -0.339734   | -0.54082338 |
| ZNF408      | -0.26236338 | -0.33957453 | -0.38782996 |
| ALG3        | -0.3389394  | -0.32429392 | -0.52733253 |
| WIZ         | -0.3386708  | -0.23583346 | -0.37982484 |
| BAIAP2L1    | -0.26230457 | -0.33833424 | -0.6019588  |
| CTIF        | -0.32081451 | -0.33504599 | -0.59247473 |
| MACROD1     | -0.33385226 | -0.31944701 | -0.57686503 |
| COASY       | -0.33200618 | -0.31079482 | -0.35159706 |
| GLTPD2      | -0.33175708 | -0.27314765 | -0.41857497 |
| CES2        | -0.32990787 | -0.24570301 | -0.51333198 |
| FAM96B      | -0.32990787 | -0.24570233 | -0.51333199 |
| SDC1        | -0.26936324 | -0.32918957 | -0.67380275 |
| ZBTB39      | -0.32865224 | -0.32095137 | -0.52880004 |
| HDAC4       | -0.32840301 | -0.31694505 | -0.35579226 |
| SLC23A3     | -0.32771937 | -0.31415409 | -0.54951    |
| C1orf220    | -0.32669137 | -0.27036106 | -0.40595386 |
| AP000253.1  | -0.32451248 | -0.29401886 | -0.38843167 |
| PPP1R26     | -0.3197786  | -0.29937873 | -0.54370224 |
| PCTP        | -0.28365657 | -0.3197411  | -0.5922709  |
| RPS29       | -0.27154984 | -0.319368   | -0.47937039 |
| LTB4R2      | -0.27227953 | -0.31874686 | -0.50537021 |

Table S5

|             |             |             |             |
|-------------|-------------|-------------|-------------|
| LTB4R       | -0.27227964 | -0.31874682 | -0.50537054 |
| KIAA2013    | -0.31837726 | -0.27583915 | -0.65165537 |
| SOD1        | -0.31814476 | -0.30820525 | -0.43495631 |
| NFYC        | -0.31229081 | -0.31672619 | -0.71642785 |
| DDI2        | -0.31641086 | -0.26843984 | -0.51322867 |
| PLA2G12B    | -0.31627894 | -0.27972574 | -0.76500964 |
| GSDMD       | -0.31549845 | -0.28092864 | -0.45407789 |
| C2          | -0.31260761 | -0.31434771 | -0.37725902 |
| ENKD1       | -0.31330502 | -0.30424951 | -0.32537375 |
| NUDT7       | -0.29642592 | -0.31281805 | -0.59155236 |
| CDON        | -0.31268371 | -0.26055483 | -0.4537799  |
| PEX11G      | -0.28673975 | -0.31256604 | -0.43191405 |
| UPB1        | -0.31139815 | -0.27512159 | -0.66114964 |
| CTNNBIP1    | -0.31070486 | -0.26971012 | -0.63266762 |
| FAHD2A      | -0.2759954  | -0.31009587 | -0.5911725  |
| RAB40B      | -0.27038904 | -0.30958601 | -0.50080643 |
| NAPA        | -0.30932566 | -0.24080098 | -0.39108463 |
| ATP11C      | -0.30919624 | -0.29446512 | -0.29433853 |
| TPCN1       | -0.2009117  | -0.30642959 | -0.49180961 |
| KLHDC2      | -0.25686425 | -0.30247648 | -0.56946719 |
| MCEE        | -0.30024145 | -0.29215766 | -0.4924433  |
| SLC37A4     | -0.27316758 | -0.30000485 | -0.39287485 |
| VAMP8       | -0.29952151 | -0.27377672 | -0.66261782 |
| ERMARD      | -0.29347634 | -0.29781332 | -0.36727197 |
| FAM35A      | -0.29523254 | -0.26738233 | -0.50841281 |
| RPL41       | -0.29310028 | -0.23916321 | -0.42498011 |
| RP4-605O3.4 | -0.2906624  | -0.23350988 | -0.38612762 |
| COX14       | -0.2906624  | -0.2335097  | -0.38612769 |
| PMF1        | -0.22145396 | -0.28935479 | -0.38422636 |
| MTMR4       | -0.28516127 | -0.28642688 | -0.43720715 |
| MCCC2       | -0.28210687 | -0.26364444 | -0.39030983 |
| ZNF787      | -0.27950087 | -0.21988141 | -0.38233136 |
| NPRL3       | -0.25928478 | -0.27888637 | -0.37029619 |
| RAB11FIP3   | -0.25547192 | -0.27748997 | -0.31537347 |
| PLXNB2      | -0.2757926  | -0.20709931 | -0.36280601 |
| RP11-1055B8 | -0.24897767 | -0.27466938 | -0.31095603 |
| DBI         | -0.23974492 | -0.26067366 | -0.41708917 |
| SLC27A3     | -0.22292407 | -0.25561704 | -0.51676853 |
| RP11-1275H2 | -0.22375083 | -0.25122346 | -0.56320321 |
| RP11-1275H2 | -0.22375074 | -0.25122324 | -0.56320293 |
| ZNF689      | -0.24985306 | -0.24292946 | -0.39225597 |
| OGG1        | -0.23787695 | -0.24669267 | -0.3942732  |
| HIPK1       | 0.223081365 | 0.226794208 | 0.42875155  |
| AFTPH       | 0.229032561 | 0.231996349 | 0.323559765 |
| EZR         | 0.260488531 | 0.253964073 | 0.38550148  |
| GAL3ST4     | 0.244427108 | 0.281077987 | 0.352040875 |
| GGPS1       | 0.273509615 | 0.291437197 | 0.480016327 |
| PPARD       | 0.294225848 | 0.262095152 | 0.446216662 |
| PRPF38B     | 0.286121834 | 0.294350856 | 0.433861891 |



Table S5

|              |             |             |             |
|--------------|-------------|-------------|-------------|
| HIVEP2       | 0.299790442 | 0.267480267 | 0.51770794  |
| DENND3       | 0.261596651 | 0.300499743 | 0.445395014 |
| RP11-356I2.4 | 0.275183333 | 0.304513623 | 0.405223713 |
| CREB1        | 0.303374547 | 0.306719613 | 0.43707227  |
| OSTM1        | 0.29658056  | 0.311399251 | 0.358633263 |
| NABP1        | 0.310719368 | 0.312596991 | 0.403025616 |
| GNA13        | 0.315310025 | 0.261456232 | 0.439649474 |
| SPAG4        | 0.316600746 | 0.312743412 | 0.723950376 |
| PARP8        | 0.284753406 | 0.317782005 | 0.375889268 |
| SYT11        | 0.320922325 | 0.32197549  | 0.639831372 |
| GON4L        | 0.320922596 | 0.321975568 | 0.639831596 |
| RAB34        | 0.283690332 | 0.322605087 | 0.631162145 |
| ARL4A        | 0.323018    | 0.312977801 | 0.361910759 |
| LEPROTL1     | 0.325857506 | 0.279288314 | 0.467482332 |
| HIVEP3       | 0.293661045 | 0.328636235 | 0.408247886 |
| ANXA11       | 0.330605932 | 0.201074502 | 0.4482582   |
| OGFRL1       | 0.334888571 | 0.30733855  | 0.447109696 |
| KLHL5        | 0.335375097 | 0.285531484 | 0.434886497 |
| IGF1R        | 0.340467509 | 0.328250579 | 0.631430121 |
| COL4A2       | 0.342154233 | 0.259035993 | 0.500340147 |
| PAK1         | 0.342711696 | 0.326455729 | 0.342389648 |
| JUN          | 0.346821453 | 0.294065815 | 0.577942173 |
| MTMR11       | 0.347161352 | 0.285825824 | 0.455952978 |
| PDCD4        | 0.266200027 | 0.352438561 | 0.29721909  |
| FHL3         | 0.343154803 | 0.355441214 | 0.615296883 |
| F2R          | 0.356939871 | 0.352328927 | 0.375444003 |
| MAP3K8       | 0.357692867 | 0.273579837 | 0.56758922  |
| SERPINB9     | 0.319539442 | 0.359817902 | 0.623353362 |
| PRDM2        | 0.280549516 | 0.359942734 | 0.519022522 |
| IFFO2        | 0.361269267 | 0.345816233 | 0.456255939 |
| ZNF160       | 0.359936416 | 0.36378827  | 0.586059349 |
| TCP11L2      | 0.28389699  | 0.366840954 | 0.425968189 |
| ACER2        | 0.367829349 | 0.305360022 | 0.728615919 |
| RNF145       | 0.365827554 | 0.369032385 | 0.569779907 |
| SH3RF3       | 0.287075499 | 0.369541857 | 0.63185531  |
| SMURF2       | 0.309739652 | 0.372569024 | 0.545036894 |
| CD47         | 0.373919004 | 0.363151165 | 0.492820842 |
| MKL1         | 0.375310467 | 0.291027877 | 0.369775823 |
| MAPRE1       | 0.350819218 | 0.375570159 | 0.588737072 |
| BCL2         | 0.362056703 | 0.377629521 | 0.41328166  |
| TSPYL1       | 0.37911655  | 0.275706593 | 0.595705473 |
| RALGDS       | 0.315885323 | 0.380451608 | 0.687624369 |
| USP37        | 0.381606158 | 0.340598244 | 0.61377526  |
| RUNX2        | 0.292060239 | 0.384022378 | 0.379230373 |
| IQGAP1       | 0.384183601 | 0.376788815 | 0.502844746 |
| CDC42EP3     | 0.384923345 | 0.37741779  | 0.65951309  |
| PAFAH1B2     | 0.385863482 | 0.355677091 | 0.583945924 |
| DUSP5        | 0.37846408  | 0.386244743 | 0.669042634 |
| RNF24        | 0.387484918 | 0.297827827 | 0.611629188 |

Table S5

|             |             |             |             |
|-------------|-------------|-------------|-------------|
| SLC12A2     | 0.391208096 | 0.363408594 | 0.525635738 |
| GYPC        | 0.305133073 | 0.391662919 | 0.467420726 |
| IL2RA       | 0.395355832 | 0.328750423 | 0.392907034 |
| ZNF304      | 0.32302879  | 0.396134187 | 0.60977122  |
| FAM129B     | 0.365404021 | 0.397450652 | 0.637636248 |
| AAGAB       | 0.394117875 | 0.402878196 | 0.569016988 |
| KIAA1462    | 0.403469816 | 0.390227568 | 0.67699461  |
| MDFIC       | 0.404998532 | 0.311795078 | 0.422101754 |
| IGFBP7      | 0.378551077 | 0.405538443 | 0.799148068 |
| STK17A      | 0.392601896 | 0.406428221 | 0.550560206 |
| POU6F1      | 0.382764162 | 0.407952433 | 0.732505883 |
| CEP135      | 0.408054151 | 0.341360251 | 0.488600789 |
| ZNF568      | 0.33969794  | 0.408521724 | 0.375076773 |
| IDS         | 0.375522944 | 0.409573421 | 0.673277179 |
| ATP2B4      | 0.265743188 | 0.410072852 | 0.516609998 |
| HELB        | 0.410351914 | 0.404359624 | 0.6121013   |
| FAM49B      | 0.29091936  | 0.411063187 | 0.462608914 |
| AGO2        | 0.283941632 | 0.411168589 | 0.672433353 |
| CDC42SE2    | 0.412402579 | 0.379245204 | 0.612313082 |
| SP110       | 0.351812513 | 0.412938598 | 0.437882922 |
| REL         | 0.413520475 | 0.272690619 | 0.456416805 |
| FAM228B     | 0.413555441 | 0.395111656 | 0.625609682 |
| LUZP1       | 0.413661188 | 0.324162097 | 0.526863689 |
| CD58        | 0.374650165 | 0.414597379 | 0.482002266 |
| TULP3       | 0.415365485 | 0.391756036 | 0.612974034 |
| JAG1        | 0.41536706  | 0.274330693 | 0.475637725 |
| ZNF292      | 0.416049087 | 0.302302737 | 0.544846445 |
| CTTNBP2NL   | 0.41729261  | 0.307937381 | 0.447608269 |
| BBS7        | 0.381288072 | 0.420247506 | 0.699890733 |
| HSPA12A     | 0.421194905 | 0.354604288 | 0.933883624 |
| PRICKLE2    | 0.422388397 | 0.269549905 | 0.509798219 |
| RAVER2      | 0.424645489 | 0.396429822 | 0.465886695 |
| EGLN3       | 0.35420715  | 0.427324125 | 0.553939854 |
| ZNF614      | 0.427340743 | 0.326688866 | 0.533644537 |
| TIMP2       | 0.427906953 | 0.397655497 | 0.639617265 |
| MXD1        | 0.429069833 | 0.330334463 | 0.718601334 |
| PKDCC       | 0.361797758 | 0.429725187 | 0.837179519 |
| SFMBT2      | 0.344571478 | 0.430611159 | 0.471917022 |
| DYRK2       | 0.349399676 | 0.431402838 | 0.562562141 |
| EVA1C       | 0.434009637 | 0.416985201 | 0.639826407 |
| SYNJ2       | 0.434044595 | 0.377296784 | 0.600653487 |
| KIRREL      | 0.435168201 | 0.41940162  | 0.825636265 |
| RPS6KA3     | 0.435884155 | 0.292247852 | 0.745301502 |
| ZNF347      | 0.436104478 | 0.433054579 | 0.840429453 |
| HSPBAP1     | 0.440346368 | 0.264763076 | 0.517287908 |
| ANKRD44     | 0.354216724 | 0.44114336  | 0.393004182 |
| STK4        | 0.305577418 | 0.441628945 | 0.472876895 |
| PHACTR2     | 0.441863107 | 0.30109068  | 0.399756804 |
| RP1-111C20. | 0.298700267 | 0.442328546 | 0.538737017 |

Table S5

|           |             |             |             |
|-----------|-------------|-------------|-------------|
| ZNF548    | 0.292036365 | 0.443258443 | 0.595391167 |
| ETS1      | 0.385071751 | 0.443436847 | 0.557858443 |
| PDE7A     | 0.444196662 | 0.421571495 | 0.629287433 |
| C1QTNF1   | 0.44015928  | 0.444534134 | 0.824921312 |
| NF1       | 0.444607921 | 0.343258878 | 0.599683769 |
| PMP22     | 0.445985181 | 0.402815098 | 0.823757235 |
| ANTXR1    | 0.371010854 | 0.44800178  | 0.633096563 |
| NXPE3     | 0.448138565 | 0.27467834  | 0.537424643 |
| SLC41A1   | 0.449690934 | 0.420957543 | 0.900678454 |
| TMEM217   | 0.449698291 | 0.314139174 | 0.368392256 |
| PPP1R12B  | 0.451087346 | 0.260029154 | 0.458316998 |
| PAG1      | 0.311640182 | 0.451441437 | 0.547226533 |
| LINC00092 | 0.33776175  | 0.452488826 | 0.561303408 |
| ANKRD36C  | 0.421146928 | 0.453125283 | 0.576882539 |
| SLC6A9    | 0.388165111 | 0.453161691 | 0.574088004 |
| QSOX1     | 0.429716669 | 0.454438777 | 0.608031492 |
| PAPOLG    | 0.454943589 | 0.427355618 | 0.696985246 |
| MPP3      | 0.455015369 | 0.427755128 | 0.702005006 |
| AMIGO2    | 0.375510933 | 0.455745048 | 0.637848731 |
| PDE4B     | 0.456352712 | 0.335356282 | 0.396748258 |
| TMEM185B  | 0.400942851 | 0.456635366 | 0.741478261 |
| ALOX5     | 0.314869941 | 0.456796535 | 0.525875361 |
| DDHD1     | 0.457947775 | 0.378342924 | 0.722001022 |
| PAM       | 0.458964423 | 0.412575192 | 0.7266303   |
| ARMC2     | 0.459694287 | 0.255232991 | 0.337034311 |
| EMP3      | 0.30966654  | 0.46017564  | 0.621051109 |
| PRTFDC1   | 0.430369821 | 0.460880726 | 0.6309021   |
| WIPF1     | 0.34676681  | 0.463047473 | 0.495000465 |
| UBE2Q2    | 0.463428871 | 0.440399557 | 0.644102319 |
| DNM3      | 0.467082408 | 0.422656904 | 0.532075148 |
| PACS1     | 0.374660341 | 0.467571481 | 0.750372174 |
| MAFK      | 0.471025329 | 0.401034756 | 0.841548636 |
| HECA      | 0.329154364 | 0.477860286 | 0.733628582 |
| FHOD1     | 0.409563151 | 0.478254394 | 0.70168082  |
| ZNF611    | 0.394147266 | 0.479161963 | 0.527688616 |
| FKBP10    | 0.458698707 | 0.479916874 | 0.616501775 |
| CEP85L    | 0.48009881  | 0.3076561   | 0.580334507 |
| PRDM1     | 0.46971767  | 0.48160546  | 0.477783114 |
| TMEM184B  | 0.481630466 | 0.478697692 | 0.768904805 |
| IER5      | 0.373800487 | 0.482383647 | 0.761903655 |
| GPRASP1   | 0.388498378 | 0.482426021 | 1.160182126 |
| PIP4K2A   | 0.40369193  | 0.484900626 | 0.495228797 |
| FAM57A    | 0.42520587  | 0.484943301 | 0.793808568 |
| STXBP1    | 0.487709912 | 0.460779663 | 0.980004461 |
| SYTL3     | 0.239362443 | 0.488129786 | 0.493239551 |
| SCLT1     | 0.489331285 | 0.426597413 | 0.824877495 |
| TPM2      | 0.490370619 | 0.488065297 | 0.793161909 |
| ARRDC4    | 0.349732724 | 0.490549623 | 0.347647808 |
| RUNX1     | 0.491034796 | 0.396241437 | 0.353831264 |

Table S5

|           |             |             |             |
|-----------|-------------|-------------|-------------|
| SEL1L3    | 0.413177057 | 0.491640707 | 0.518772018 |
| ZC3HAV1L  | 0.386688012 | 0.492259925 | 0.728158869 |
| DACT1     | 0.493396734 | 0.452295073 | 1.038261475 |
| ANK3      | 0.378458505 | 0.495036288 | 0.485385694 |
| BIRC3     | 0.483974999 | 0.495183938 | 0.646148009 |
| APH1B     | 0.49565719  | 0.467480552 | 0.682015478 |
| CMTM7     | 0.338289337 | 0.496557216 | 0.4804797   |
| GLIPR2    | 0.303163715 | 0.497178503 | 0.511068333 |
| ABCC4     | 0.500754987 | 0.374485403 | 0.40235697  |
| PPP1R2    | 0.30381138  | 0.501012439 | 0.61673513  |
| PHLDB1    | 0.397872735 | 0.501248605 | 0.91412194  |
| MEF2C     | 0.502942455 | 0.358971574 | 0.571762933 |
| CEP97     | 0.503328626 | 0.4070238   | 0.7141843   |
| ITPKB     | 0.333122048 | 0.504518486 | 0.520764515 |
| METRNL    | 0.321827262 | 0.506598937 | 0.803407154 |
| COL4A1    | 0.506930346 | 0.452896292 | 0.955112343 |
| DBN1      | 0.463452059 | 0.50779986  | 0.81525489  |
| TNFAIP8   | 0.416893454 | 0.509512265 | 0.620493824 |
| CHST15    | 0.509877616 | 0.433531977 | 0.516321256 |
| FBLIM1    | 0.510973153 | 0.448519174 | 0.53024578  |
| PCSK5     | 0.512893662 | 0.401550072 | 0.378796981 |
| ARRDC2    | 0.438137992 | 0.514273212 | 0.623576633 |
| MMP14     | 0.514579971 | 0.357666286 | 0.642425098 |
| BARD1     | 0.515778395 | 0.49116312  | 0.737108257 |
| GATA2     | 0.407348652 | 0.516425777 | 0.832191932 |
| FAM102B   | 0.510185364 | 0.51646631  | 0.614132616 |
| PHF20     | 0.359671859 | 0.517148783 | 0.715179235 |
| FOS       | 0.517234824 | 0.498433236 | 0.946633041 |
| PLAGL1    | 0.36332848  | 0.51831473  | 0.677888337 |
| ADAMTS10  | 0.518913035 | 0.459491976 | 0.457195409 |
| VCL       | 0.519639895 | 0.309331897 | 0.699337003 |
| NFKB2     | 0.376319496 | 0.520614223 | 0.908502759 |
| ZNF267    | 0.522100613 | 0.403892853 | 0.774606055 |
| GEM       | 0.493699669 | 0.522751691 | 1.172023856 |
| SH3YL1    | 0.524620877 | 0.396174751 | 0.504277401 |
| TP53BP1   | 0.417989943 | 0.525821354 | 0.691957957 |
| CHST3     | 0.525971357 | 0.398703752 | 0.616554266 |
| MEF2C-AS1 | 0.52831047  | 0.435842477 | 0.636296372 |
| GALNT7    | 0.479120496 | 0.529427407 | 0.751715971 |
| PPP1R15A  | 0.514389737 | 0.529603346 | 0.986872636 |
| FAM131A   | 0.530523529 | 0.470298667 | 1.018516806 |
| CHST11    | 0.350138133 | 0.531216338 | 0.504331794 |
| NEURL3    | 0.532005762 | 0.405252886 | 0.337177055 |
| SPINT2    | 0.408651085 | 0.532163047 | 0.699850131 |
| RIN1      | 0.501040364 | 0.532660833 | 0.782224013 |
| CDKN1A    | 0.535850244 | 0.370355654 | 0.697261125 |
| RASGRP3   | 0.53609675  | 0.426859625 | 0.396080844 |
| PDE3A     | 0.53625641  | 0.412633357 | 0.955539934 |
| PDE5A     | 0.537329583 | 0.459864608 | 0.665333288 |

Table S5

|             |             |             |             |
|-------------|-------------|-------------|-------------|
| DNAJB6      | 0.431645686 | 0.537396201 | 0.976173903 |
| GIPR        | 0.535012512 | 0.539011536 | 0.659671634 |
| NKRF        | 0.539077522 | 0.488154126 | 1.054627643 |
| TNFRSF12A   | 0.540172975 | 0.475554852 | 0.93214963  |
| B3GNT7      | 0.404921375 | 0.543105597 | 0.616382278 |
| SLC1A5      | 0.417498642 | 0.543489452 | 0.816040235 |
| NOTCH3      | 0.543693344 | 0.387966504 | 0.784943273 |
| HCG11       | 0.357110286 | 0.545716937 | 0.601438376 |
| HDAC7       | 0.464499603 | 0.546081129 | 0.722697103 |
| ARL4C       | 0.385958776 | 0.547515878 | 0.67877737  |
| SLC26A2     | 0.477197812 | 0.547998395 | 0.857326247 |
| E2F3        | 0.549127291 | 0.409319498 | 0.659670909 |
| NFKBID      | 0.35908523  | 0.552198181 | 0.760798409 |
| ENDOD1      | 0.552480245 | 0.552217026 | 0.71269388  |
| PEA15       | 0.555507539 | 0.546543456 | 1.03931698  |
| FLVCR1      | 0.5560836   | 0.337673047 | 0.836742252 |
| TUBB6       | 0.556252434 | 0.491547156 | 1.100981946 |
| CHORDC1     | 0.556449598 | 0.541511635 | 1.02694634  |
| CAV1        | 0.557498756 | 0.30249684  | 0.500792194 |
| SLC35F2     | 0.558606474 | 0.51792416  | 0.683458454 |
| PDP1        | 0.392131742 | 0.559931073 | 0.821012257 |
| NRSN2       | 0.560690894 | 0.560408616 | 0.947109278 |
| FAM167A     | 0.456280796 | 0.562433878 | 0.490249392 |
| AP3M2       | 0.312142642 | 0.562985459 | 0.751841339 |
| MTHFD1L     | 0.563113995 | 0.388935503 | 0.676478865 |
| ITPR3       | 0.347230059 | 0.563192021 | 0.546994507 |
| ISG20       | 0.450280119 | 0.566118365 | 0.696019577 |
| RARG        | 0.381317291 | 0.56736657  | 0.628509881 |
| TMEM51      | 0.567479855 | 0.423530116 | 0.922976481 |
| RP11-712B9. | 0.512347276 | 0.567727404 | 0.683375688 |
| PCBP3       | 0.458314433 | 0.568121124 | 1.253028059 |
| ARHGAP31    | 0.562569988 | 0.568878284 | 0.733082547 |
| INPP4B      | 0.501956565 | 0.569897846 | 0.789517103 |
| PRICKLE1    | 0.570264607 | 0.568914698 | 0.89873799  |
| SWAP70      | 0.571210056 | 0.547021419 | 0.734928003 |
| TMEM173     | 0.313752238 | 0.571944503 | 0.699594715 |
| WNT4        | 0.446798283 | 0.57537098  | 0.857393868 |
| MARCH3      | 0.576055231 | 0.450017656 | 0.76152768  |
| PTPRH       | 0.576704696 | 0.532198117 | 0.556602024 |
| TMEM51-AS1  | 0.576892658 | 0.421529415 | 0.967370605 |
| ADAM9       | 0.580951303 | 0.276442036 | 0.715379109 |
| AP1S3       | 0.581252425 | 0.489957904 | 0.776054731 |
| GSTM5       | 0.535085686 | 0.58281795  | 0.61725555  |
| GSN         | 0.583038296 | 0.349205276 | 0.531799513 |
| PLAU        | 0.369327975 | 0.584164174 | 0.666492951 |
| RAB8B       | 0.584385099 | 0.435094975 | 0.61975685  |
| ZNF486      | 0.513653742 | 0.584671173 | 1.066425204 |
| RP11-848P1. | 0.579554881 | 0.585260645 | 0.876293593 |
| ZNF853      | 0.407358804 | 0.586522537 | 0.907036426 |

Table S5

|           |             |             |             |
|-----------|-------------|-------------|-------------|
| DLG3      | 0.528967315 | 0.586854813 | 0.820866921 |
| FGFR1     | 0.587809055 | 0.510332868 | 1.094461747 |
| STX11     | 0.589569559 | 0.557751235 | 0.727483359 |
| ZSWIM4    | 0.589734431 | 0.562869664 | 0.970940457 |
| CD83      | 0.434278257 | 0.59034087  | 0.76950853  |
| P2RX1     | 0.39595553  | 0.592074792 | 0.806698716 |
| SYCP2     | 0.507744487 | 0.593534714 | 0.921371064 |
| SLC25A24  | 0.595278352 | 0.450309161 | 0.689776722 |
| FAR1      | 0.379336753 | 0.595745636 | 0.828215269 |
| ITGA3     | 0.596532834 | 0.575199784 | 0.88123093  |
| IL34      | 0.526819781 | 0.596731065 | 0.85169493  |
| COL16A1   | 0.539115511 | 0.598463585 | 0.934729851 |
| FUT4      | 0.525829321 | 0.598517053 | 0.686539662 |
| TPM4      | 0.420217884 | 0.599852113 | 0.76783008  |
| MCAM      | 0.600988239 | 0.507317604 | 0.734896967 |
| STAT4     | 0.601068057 | 0.568990497 | 0.881825694 |
| LOXL1     | 0.392251889 | 0.60176019  | 1.05835009  |
| ENAH      | 0.602824516 | 0.370603715 | 0.795983765 |
| KIF3C     | 0.544753065 | 0.604347027 | 0.677303717 |
| EIF5A2    | 0.583215851 | 0.604884516 | 0.970919778 |
| F3        | 0.6056885   | 0.491853766 | 1.087764645 |
| ITM2C     | 0.474441429 | 0.608117542 | 0.62955545  |
| CLSTN1    | 0.526125776 | 0.609830867 | 0.950303805 |
| MTHFD2    | 0.491592573 | 0.610179805 | 1.10181115  |
| LINC00271 | 0.611760602 | 0.365382416 | 0.757981791 |
| AHI1      | 0.61176064  | 0.365382539 | 0.75798221  |
| PTGER4    | 0.378194404 | 0.612572855 | 0.69796355  |
| SRGN      | 0.612651009 | 0.565882212 | 0.857164284 |
| PARP6     | 0.409681335 | 0.612664171 | 0.772020189 |
| C1orf116  | 0.612768101 | 0.482580222 | 0.500828914 |
| CYS1      | 0.614048741 | 0.587103886 | 0.772618875 |
| ATP9A     | 0.615486653 | 0.311866672 | 0.621591589 |
| CYTIP     | 0.530097039 | 0.615903841 | 0.71314352  |
| C1orf145  | 0.425811014 | 0.616010027 | 0.947567772 |
| COL12A1   | 0.617872719 | 0.554285849 | 1.363484275 |
| SESN3     | 0.411890139 | 0.619608405 | 0.725186499 |
| ALDH1A3   | 0.620365164 | 0.548935512 | 0.897281609 |
| PDLIM4    | 0.620418181 | 0.520717767 | 1.316114933 |
| ABCC1     | 0.602252697 | 0.621409834 | 0.98393832  |
| ARSJ      | 0.621802897 | 0.38518403  | 0.558392857 |
| RELB      | 0.401047262 | 0.62198863  | 0.920851678 |
| MYOF      | 0.62355697  | 0.479672522 | 0.715551801 |
| GSTP1     | 0.565258276 | 0.624030881 | 0.88237969  |
| RHOQ      | 0.62453525  | 0.506191347 | 1.043641376 |
| LTBP4     | 0.355422168 | 0.624952145 | 0.845579797 |
| BATF3     | 0.625352233 | 0.609677722 | 1.206122759 |
| TEAD4     | 0.62582399  | 0.435645967 | 1.069355119 |
| COL1A2    | 0.478290766 | 0.626283835 | 1.107571775 |
| RIMKLB    | 0.627178251 | 0.459354882 | 1.071884245 |

Table S5

|             |             |             |             |
|-------------|-------------|-------------|-------------|
| PYGO1       | 0.452025227 | 0.628402572 | 1.03335707  |
| ROBO1       | 0.628490964 | 0.55898068  | 0.988995948 |
| ZNF529      | 0.557124579 | 0.628588981 | 0.628995561 |
| RAB11FIP5   | 0.629195582 | 0.366165132 | 0.775278583 |
| RECK        | 0.629476899 | 0.43788935  | 0.864847551 |
| BEX4        | 0.591085104 | 0.630052112 | 0.925028193 |
| SFXN3       | 0.587975754 | 0.630408542 | 1.022436964 |
| PIWIL4      | 0.631344199 | 0.538626102 | 0.655619141 |
| SPECC1      | 0.479480724 | 0.634446756 | 0.770884397 |
| PAQR5       | 0.634673137 | 0.531130076 | 0.658700773 |
| ISYNA1      | 0.439517876 | 0.6369664   | 0.868617214 |
| VIM-AS1     | 0.511396095 | 0.637303626 | 0.826360371 |
| ZNF667-AS1  | 0.528779455 | 0.638381935 | 0.970760707 |
| ZNF667      | 0.528779164 | 0.638382088 | 0.970761003 |
| RAB11FIP1   | 0.385998578 | 0.638469335 | 0.647451819 |
| ODF2L       | 0.638581945 | 0.608583863 | 0.899801544 |
| NCK2        | 0.518033314 | 0.638670339 | 0.756055898 |
| DZIP1L      | 0.639337214 | 0.600650837 | 0.884641504 |
| SLC38A1     | 0.588848903 | 0.63944904  | 0.747693422 |
| SCRN1       | 0.641715083 | 0.569662547 | 0.943347181 |
| HENMT1      | 0.413490647 | 0.642825889 | 0.709796509 |
| SLC45A4     | 0.48788347  | 0.64300174  | 0.772410458 |
| VIM         | 0.505487077 | 0.644339332 | 0.833819994 |
| ZNF506      | 0.644617345 | 0.610131543 | 0.990952769 |
| MLLT3       | 0.599369123 | 0.645692864 | 0.772027852 |
| PLD4        | 0.502701344 | 0.649919532 | 0.825313474 |
| SLC7A6      | 0.415123721 | 0.651101267 | 0.822257322 |
| FRAS1       | 0.651770989 | 0.538172221 | 0.518146397 |
| XYLT1       | 0.427888943 | 0.651792969 | 0.58332928  |
| DNAJC6      | 0.653386652 | 0.566178783 | 0.783161672 |
| BICD1       | 0.653645784 | 0.566036138 | 0.883501062 |
| CYR61       | 0.65428371  | 0.475106685 | 0.823760926 |
| ZNF426      | 0.654417115 | 0.436738757 | 0.775752243 |
| OBSCN       | 0.403118771 | 0.655132817 | 0.80214218  |
| CLCF1       | 0.655495699 | 0.62940671  | 0.871357132 |
| C7orf31     | 0.406849569 | 0.660036834 | 0.667563336 |
| LCA5        | 0.660079501 | 0.43118261  | 0.791924815 |
| ZFP82       | 0.625990458 | 0.660677336 | 1.032572749 |
| LXN         | 0.661118683 | 0.483500037 | 0.626197715 |
| KIAA0226L   | 0.508741315 | 0.661907654 | 0.741685485 |
| LBH         | 0.344988323 | 0.661916514 | 0.706489011 |
| RP11-44N21. | 0.503208663 | 0.663164549 | 0.677958082 |
| BCL11A      | 0.569817577 | 0.663195155 | 0.655630669 |
| SOD3        | 0.584113812 | 0.663305316 | 1.106175413 |
| VANGL2      | 0.664977753 | 0.631817024 | 1.021377972 |
| MAP2        | 0.665740249 | 0.441906702 | 0.775220046 |
| TUBA1A      | 0.537600306 | 0.666033171 | 0.818008175 |
| FLRT2       | 0.666327567 | 0.550876944 | 0.695048083 |
| IFT57       | 0.666688379 | 0.535326684 | 0.947516169 |



Table S5

|             |             |             |             |
|-------------|-------------|-------------|-------------|
| RP11-1149O2 | 0.53127556  | 0.669059338 | 0.783240061 |
| NFATC4      | 0.563652334 | 0.669185203 | 1.038567124 |
| ADRA2A      | 0.668960964 | 0.670133927 | 0.853816691 |
| HLA-L       | 0.532802191 | 0.676069925 | 0.818613336 |
| CD44        | 0.414713869 | 0.677186835 | 0.649040149 |
| STK39       | 0.555015527 | 0.679326707 | 0.797824225 |
| PTP4A3      | 0.336537952 | 0.679821803 | 0.798439769 |
| RASSF3      | 0.674825272 | 0.681187081 | 0.675761777 |
| IGF2BP2     | 0.615170482 | 0.685164517 | 0.856115682 |
| ARMCX1      | 0.67367224  | 0.692607097 | 0.859588727 |
| PDGFA       | 0.692748857 | 0.64020435  | 0.852544453 |
| MAML2       | 0.692868133 | 0.614441612 | 0.820421152 |
| HOMER1      | 0.645885319 | 0.694713666 | 1.07495359  |
| SLC25A36    | 0.618226778 | 0.695150081 | 1.056583337 |
| MEX3B       | 0.488256445 | 0.695256891 | 1.093299601 |
| ZNF14       | 0.509113578 | 0.697003092 | 1.1886554   |
| CSGALNACT   | 0.697211201 | 0.53962567  | 0.54981778  |
| ZNF43       | 0.697660428 | 0.660418506 | 1.039602559 |
| FAM60A      | 0.69798662  | 0.576873459 | 0.866129435 |
| ZDHHC13     | 0.592845673 | 0.701343126 | 0.878320105 |
| ROR2        | 0.479533781 | 0.701468525 | 1.334462634 |
| LRRRC8B     | 0.702189748 | 0.435268295 | 0.787451084 |
| SNPH        | 0.658618236 | 0.703076302 | 0.743536074 |
| SIK1        | 0.575175777 | 0.704032935 | 0.857330428 |
| PDE4A       | 0.502387205 | 0.707425463 | 0.848590406 |
| SLC6A8      | 0.492512832 | 0.709858623 | 1.037486517 |
| LETM2       | 0.70993884  | 0.518588338 | 1.06272038  |
| NLRP1       | 0.33686951  | 0.712029867 | 0.644611348 |
| SLFN11      | 0.571798012 | 0.71204882  | 1.16316364  |
| CDC7        | 0.713855959 | 0.465142137 | 1.163339351 |
| AFAP1       | 0.636247917 | 0.71489051  | 0.998032109 |
| ZC2HC1A     | 0.629179178 | 0.716519229 | 0.787930296 |
| FMNL1       | 0.324273897 | 0.717821922 | 0.736343112 |
| NFE2L3      | 0.574755836 | 0.719681886 | 0.852479407 |
| TNFRSF21    | 0.719694702 | 0.546953084 | 0.975354691 |
| CHST10      | 0.719728816 | 0.612378244 | 0.689641456 |
| SELM        | 0.56812723  | 0.719758395 | 1.13945753  |
| RP11-325F22 | 0.504605968 | 0.720904511 | 0.879016287 |
| MST1R       | 0.471818744 | 0.720963103 | 0.732662873 |
| STX3        | 0.721029849 | 0.48367941  | 0.735726677 |
| MFSD6       | 0.522895394 | 0.72111097  | 0.86857323  |
| MIR24-2     | 0.539064298 | 0.721400786 | 0.947081072 |
| TNFRSF10A   | 0.504172594 | 0.721506148 | 0.703351839 |
| GABBR1      | 0.650014502 | 0.721575598 | 1.057885613 |
| S100A4      | 0.368205207 | 0.72160432  | 0.528870877 |
| CNN2        | 0.352231279 | 0.724444832 | 0.884437516 |
| NFATC1      | 0.530487375 | 0.724553046 | 1.069256941 |
| SGCA        | 0.72589799  | 0.719817199 | 0.923686675 |
| HTR7        | 0.475920305 | 0.727896868 | 0.945541087 |

Table S5

|            |             |             |             |
|------------|-------------|-------------|-------------|
| ZNF462     | 0.730060555 | 0.448876496 | 0.767522714 |
| EPB41L4A   | 0.730407794 | 0.578174473 | 0.537996968 |
| TC2N       | 0.566990497 | 0.730476923 | 0.68615594  |
| STK17B     | 0.457297522 | 0.731689385 | 0.708575115 |
| FAM43A     | 0.38031763  | 0.7321046   | 0.640350792 |
| ZNF682     | 0.732581884 | 0.552419208 | 0.861595742 |
| CDR2L      | 0.732599979 | 0.521053825 | 1.047390046 |
| ANXA1      | 0.732640229 | 0.578697593 | 0.766981146 |
| DBNDD2     | 0.733101326 | 0.733446323 | 1.134643553 |
| MCTP2      | 0.734541442 | 0.717216957 | 1.096167097 |
| TRPC1      | 0.741884183 | 0.596541628 | 1.43374006  |
| NCR3LG1    | 0.742760607 | 0.604957529 | 0.982401369 |
| GDPD1      | 0.746106966 | 0.520454335 | 0.705913897 |
| ZNF551     | 0.551751402 | 0.747659986 | 0.89612945  |
| EFEMP1     | 0.683044106 | 0.748331595 | 1.216295935 |
| BTG2       | 0.6140358   | 0.748932299 | 1.023087277 |
| GPR160     | 0.699344485 | 0.755159106 | 0.598891627 |
| ENO2       | 0.560165372 | 0.757274638 | 1.12421352  |
| PTPN13     | 0.731357558 | 0.757326872 | 1.056037368 |
| MAPK10     | 0.73135737  | 0.757328391 | 1.056046667 |
| SRGAP1     | 0.758608897 | 0.604731801 | 0.534220668 |
| METTL24    | 0.760346167 | 0.717229338 | 0.717289428 |
| LOXL1-AS1  | 0.47086974  | 0.76116581  | 1.128844822 |
| ZNF135     | 0.612341726 | 0.76129642  | 1.013671626 |
| AC006273.5 | 0.761592411 | 0.735830544 | 0.619868963 |
| SLC7A1     | 0.763431281 | 0.686349262 | 1.187463138 |
| KCNN4      | 0.395429344 | 0.763767929 | 0.783537488 |
| NRARP      | 0.614133349 | 0.764442552 | 1.065866784 |
| LRRC7      | 0.764575923 | 0.654624368 | 0.90021873  |
| S100A6     | 0.714107626 | 0.765573208 | 1.099875192 |
| DUSP4      | 0.767199069 | 0.565289109 | 0.851010563 |
| TES        | 0.646417788 | 0.76721734  | 0.798211491 |
| RASSF2     | 0.425200189 | 0.767442211 | 0.68538345  |
| PFKP       | 0.768633429 | 0.394878914 | 0.65091497  |
| C11orf63   | 0.766416415 | 0.770703934 | 0.960167525 |
| SERTAD4    | 0.613864741 | 0.77235122  | 1.044123754 |
| SPHK1      | 0.773529454 | 0.596747352 | 1.101294036 |
| ZNF93      | 0.741363503 | 0.77732631  | 1.058602194 |
| DOCK8      | 0.71316828  | 0.779981583 | 0.589496134 |
| DNAJA4     | 0.416739648 | 0.78066734  | 1.072918205 |
| GUCY1A3    | 0.781015227 | 0.439094629 | 0.507237064 |
| SEZ6L2     | 0.783008462 | 0.520468142 | 0.822784534 |
| ZNF430     | 0.62275886  | 0.786366379 | 1.084634388 |
| KIF5C      | 0.569014994 | 0.786950832 | 0.867254288 |
| PMAIP1     | 0.788059081 | 0.769719603 | 1.096750623 |
| MIR155HG   | 0.638337376 | 0.789006148 | 0.865719507 |
| OSM        | 0.457170621 | 0.790183323 | 0.956708172 |
| GLIS2      | 0.585536632 | 0.790811995 | 0.832789531 |
| HS3ST1     | 0.791348044 | 0.56934978  | 0.801182106 |

Table S5

|             |             |             |             |
|-------------|-------------|-------------|-------------|
| MB21D2      | 0.791620807 | 0.612794891 | 1.138657505 |
| PAPLN       | 0.609780895 | 0.791866577 | 0.961639525 |
| ZNF83       | 0.749871293 | 0.795918019 | 1.030880274 |
| ZNF525      | 0.650878704 | 0.797975343 | 1.057567096 |
| CD24P4      | 0.799895556 | 0.793790186 | 0.933194004 |
| GLS         | 0.768838958 | 0.801281969 | 1.144375514 |
| CDS1        | 0.804153551 | 0.63792143  | 0.952696997 |
| PDZK1IP1    | 0.804195646 | 0.590929172 | 0.709574289 |
| SGPP2       | 0.806420656 | 0.748435724 | 1.097760621 |
| EMILIN2     | 0.565521219 | 0.809275777 | 0.902193776 |
| ZNF738      | 0.714205807 | 0.810129303 | 1.13657667  |
| ZNF827      | 0.61687125  | 0.81182985  | 0.781513896 |
| KIAA1324L   | 0.640722181 | 0.81313444  | 1.235642529 |
| CRIM1       | 0.813517637 | 0.572747295 | 0.921695286 |
| LGALS3      | 0.815548829 | 0.804608385 | 0.994787527 |
| AC009495.4  | 0.820258391 | 0.627158372 | 0.808078825 |
| GALNT3      | 0.820258899 | 0.627159731 | 0.808078871 |
| LAYN        | 0.825700128 | 0.56557893  | 1.052452064 |
| CDH11       | 0.789476967 | 0.827060526 | 1.477055491 |
| NBEA        | 0.828162605 | 0.557642957 | 1.036087312 |
| IFI16       | 0.829001214 | 0.570937517 | 1.011060941 |
| PRDM8       | 0.414706901 | 0.833179856 | 0.845111207 |
| EPHA4       | 0.840700397 | 0.515347282 | 0.86838433  |
| IL20RA      | 0.84074687  | 0.630800091 | 0.612826406 |
| MOXD1       | 0.618190369 | 0.855717574 | 1.150140855 |
| ZNF610      | 0.855800767 | 0.76624814  | 0.97641434  |
| C2CD4A      | 0.858076993 | 0.613315645 | 0.882540785 |
| PTPN14      | 0.85928039  | 0.542402552 | 0.945858694 |
| CLDN4       | 0.863854077 | 0.707327231 | 0.922554256 |
| ZNF320      | 0.699400505 | 0.864345226 | 0.931547715 |
| SULT1C4     | 0.866619701 | 0.558533594 | 0.718927912 |
| C1orf198    | 0.86838867  | 0.757718806 | 1.094919659 |
| RP11-255H23 | 0.783483461 | 0.871348213 | 1.010906656 |
| RP11-54O7.1 | 0.660607031 | 0.874922543 | 1.064258834 |
| ZNF439      | 0.775400301 | 0.877639273 | 1.262197178 |
| OXCT1       | 0.690523756 | 0.880938235 | 1.069254155 |
| HLA-V       | 0.659680379 | 0.881358994 | 1.16073184  |
| NACAD       | 0.885404059 | 0.789489556 | 1.300015991 |
| GRAMD1B     | 0.88789388  | 0.878245233 | 0.794624725 |
| BHLHE41     | 0.893801594 | 0.820460439 | 1.286457039 |
| CXCL1       | 0.893977743 | 0.496767088 | 0.526186881 |
| LOXL4       | 0.83770117  | 0.896403241 | 0.851418503 |
| SPINT1      | 0.901905301 | 0.813207289 | 0.975823759 |
| TUBB3       | 0.779011781 | 0.90258575  | 1.290658193 |
| SLFN13      | 0.716471682 | 0.904740565 | 0.861014631 |
| TESC        | 0.911545657 | 0.715589596 | 0.830911428 |
| GPRC5B      | 0.915824356 | 0.719255441 | 0.942102134 |
| B3GALT5     | 0.822985522 | 0.922413417 | 0.861044024 |
| LEF1        | 0.645811568 | 0.927960289 | 0.915762323 |

Table S5

|             |             |             |             |
|-------------|-------------|-------------|-------------|
| CCND2       | 0.51570471  | 0.932971738 | 0.957815292 |
| BACE2       | 0.938732448 | 0.934214528 | 1.180580729 |
| LAMA2       | 0.945124921 | 0.704265369 | 1.094934766 |
| ZNF781      | 0.895821399 | 0.947398013 | 1.099287602 |
| WFDC2       | 0.951171421 | 0.842557026 | 1.125820442 |
| ITGA2       | 0.954180973 | 0.728965144 | 1.165242523 |
| COL4A4      | 0.716633371 | 0.960954747 | 1.437879299 |
| COL4A3      | 0.716633311 | 0.960955383 | 1.437879067 |
| TAF4B       | 0.601467961 | 0.961993568 | 1.110135237 |
| ASNS        | 0.808192233 | 0.9686812   | 1.422460607 |
| SOX4        | 0.970143129 | 0.643366548 | 0.997579409 |
| ZNF607      | 0.968012074 | 0.971053252 | 0.990687874 |
| HSPA4L      | 0.97111408  | 0.703913228 | 1.071549775 |
| PRSS22      | 0.973147344 | 0.785889909 | 1.159589884 |
| KRT80       | 0.975656829 | 0.776899478 | 1.004802706 |
| ANXA3       | 0.982886526 | 0.654180672 | 0.842732126 |
| ZNF665      | 0.988269337 | 0.988497735 | 1.152050673 |
| C1orf106    | 0.989172252 | 0.922847025 | 0.839850624 |
| BDKRB2      | 1.002198914 | 0.754592751 | 1.011583899 |
| ZNF66       | 0.786372916 | 1.006124139 | 0.961626107 |
| AC098614.2  | 0.73989189  | 1.0094951   | 0.940652641 |
| ANKRD18A    | 1.010704235 | 0.791441548 | 0.785329371 |
| FAM201A     | 1.010704236 | 0.791441029 | 0.785329714 |
| KLF5        | 1.019392782 | 0.618661708 | 1.193974217 |
| ITGB8       | 1.020499958 | 0.950670586 | 1.015575709 |
| ST8SIA1     | 0.528063147 | 1.022562452 | 0.916305816 |
| ADAMTS9-AS1 | 1.038019788 | 0.676904114 | 1.166966461 |
| ADAMTS9     | 1.038019805 | 0.676904237 | 1.166966454 |
| ZNF793      | 1.036346123 | 1.04053639  | 1.202138037 |
| C3orf52     | 1.056461919 | 0.74854065  | 1.488276515 |
| CXCR4       | 0.69277409  | 1.056946558 | 1.224860879 |
| TGFB2       | 1.072455418 | 0.668162167 | 0.890278958 |
| YBX3        | 1.07488767  | 0.602134294 | 1.352336379 |
| CXCL6       | 1.076024925 | 0.821228508 | 0.696870378 |
| F2RL1       | 1.078222981 | 0.628091109 | 0.895125608 |
| GULP1       | 1.083348983 | 0.871062949 | 0.968807187 |
| ZNF382      | 0.915147688 | 1.089436784 | 1.21068632  |
| EVC         | 0.70441736  | 1.090294651 | 0.516823058 |
| TNFRSF11B   | 1.092919974 | 0.804327087 | 1.100557147 |
| PDX1        | 1.038066861 | 1.102100707 | 0.7862919   |
| PMEPA1      | 1.118648747 | 0.985973345 | 1.414838351 |
| FAM150B     | 1.129388839 | 0.933550042 | 0.922089091 |
| WNT10A      | 0.540257361 | 1.132005477 | 1.224269891 |
| TTC9        | 0.913266615 | 1.132654105 | 1.120454084 |
| TMEM55A     | 1.137570012 | 1.020245422 | 0.965784753 |
| EVC2        | 0.799160515 | 1.139165169 | 0.869281574 |
| HSPB8       | 1.025749728 | 1.15133921  | 1.120026788 |
| ZNF431      | 1.052420036 | 1.161452699 | 1.458450424 |
| B3GNT3      | 1.165471157 | 1.134595624 | 0.964679707 |

Table S5

|             |             |             |             |
|-------------|-------------|-------------|-------------|
| GABRE       | 1.165947655 | 0.831243871 | 0.892047323 |
| CTD-2008P7. | 1.167133326 | 0.994370144 | 1.052259786 |
| TBC1D30     | 1.188216141 | 0.751231151 | 1.215612395 |
| VCAN        | 1.229051871 | 0.768855041 | 0.927123212 |
| LRRC1       | 1.161178434 | 1.239454453 | 1.277581722 |
| KRT7        | 1.292728533 | 1.012872642 | 1.075317798 |
| CLIC6       | 1.327757594 | 1.073494196 | 1.204502905 |
| DUSP8       | 1.116378379 | 1.335635054 | 1.357248224 |
| CDH6        | 1.381288476 | 1.127881105 | 1.173659605 |
| EPCAM       | 1.393948787 | 1.362415936 | 1.443182647 |
| SNAP25      | 1.47530976  | 1.063873301 | 1.253565778 |
| SOX9        | 1.556321384 | 1.610091505 | 1.278104335 |
| DTNA        | 1.746428474 | 1.814806457 | 1.61084037  |
