# Supplementary material
Source: PubMed Central journal article supplement (PMC7788265)
Supplement: gutjnl-2019-318918supp004.pdf [file gutjnl-2019-318918supp004.pdf]

Table S6

| Gene         | NASH        | HCV         | Huh7.5.1 <sup>diff</sup> |
|--------------|-------------|-------------|--------------------------|
| AC114730.3   | -0.95312175 | -1.15783489 | -0.53961138              |
| U91319.1     | -0.59765221 | -1.15552389 | -0.18476415              |
| AGXT         | -1.12923854 | -0.75283994 | -0.42744196              |
| SLC6A13      | -0.90009565 | -1.09119231 | -0.35751356              |
| PPP1R1A      | -0.7017774  | -1.03625106 | -0.31030027              |
| RP11-168L7.1 | -0.48701285 | -0.93286311 | -0.34786228              |
| MROH7        | -0.89045029 | -0.91423505 | -0.20422013              |
| SLC2A4RG     | -0.9095737  | -0.59876869 | -0.20502467              |
| LIME1        | -0.90957369 | -0.59876869 | -0.20502467              |
| APOC3        | -0.89246412 | -0.45008406 | -0.19710203              |
| RBP4         | -0.83168116 | -0.72002451 | -0.15227048              |
| RGN          | -0.8093521  | -0.64054053 | -0.14685493              |
| ETNK2        | -0.80482527 | -0.67150957 | -0.41330269              |
| SMO          | -0.69834739 | -0.77436359 | -0.2060242               |
| ADH4         | -0.62470979 | -0.762872   | -0.14169104              |
| SERPINC1     | -0.64231174 | -0.75788513 | -0.41472392              |
| GJB1         | -0.73271966 | -0.71216975 | -0.23608773              |
| JAKMIP2      | -0.59190911 | -0.71988615 | -0.14737025              |
| HPX          | -0.53134133 | -0.71341157 | -0.22048817              |
| GSTA1        | -0.71032899 | -0.64856362 | -0.49184832              |
| DGAT2        | -0.70679534 | -0.70974109 | -0.18473218              |
| GALK1        | -0.6524941  | -0.70208265 | -0.24398978              |
| AC005077.7   | -0.46807058 | -0.7006907  | -0.17076323              |
| EFNA2        | -0.49300466 | -0.69998303 | -0.18082944              |
| TMPRSS6      | -0.67892758 | -0.46227989 | -0.19557779              |
| ECHDC2       | -0.54473282 | -0.67350042 | -0.19841832              |
| SLC22A7      | -0.66730949 | -0.51135093 | -0.49730254              |
| CFHR5        | -0.39484139 | -0.66518336 | -0.23077538              |
| PLG          | -0.52855394 | -0.66518177 | -0.39889675              |
| PCSK9        | -0.60364697 | -0.66493919 | -0.23477516              |
| F2           | -0.46835274 | -0.66110168 | -0.13348018              |
| MAT1A        | -0.47979927 | -0.65852281 | -0.17376426              |
| GPT          | -0.65447539 | -0.44261959 | -0.18783159              |
| SMLR1        | -0.52661369 | -0.6541607  | -0.1624478               |
| MGMT         | -0.46699718 | -0.65200609 | -0.10260697              |
| SERPINF2     | -0.61094679 | -0.65017548 | -0.20920221              |
| FBLN7        | -0.65001246 | -0.38974033 | -0.35100872              |
| SLC39A5      | -0.64976858 | -0.55007742 | -0.18568255              |
| TRABD2B      | -0.47722253 | -0.64321508 | -0.119527                |
| C2orf72      | -0.5594156  | -0.6418142  | -0.1140328               |
| APOH         | -0.43648694 | -0.63846139 | -0.15783877              |
| SLC38A3      | -0.63662377 | -0.36577035 | -0.18708251              |
| MSRB1        | -0.4839175  | -0.63462722 | -0.27123963              |
| SEMA4G       | -0.63420912 | -0.46527582 | -0.18051899              |
| COL18A1      | -0.633764   | -0.48613968 | -0.15066394              |
| GC           | -0.29478957 | -0.6335266  | -0.24257284              |
| SLC6A12      | -0.6333656  | -0.45859746 | -0.31127506              |
| LCAT         | -0.62813838 | -0.51929613 | -0.53691922              |

Table S6

|             |             |             |             |
|-------------|-------------|-------------|-------------|
| KLF15       | -0.62635639 | -0.45928035 | -0.18697126 |
| FTCD        | -0.62522253 | -0.38500405 | -0.46046201 |
| WNK3        | -0.62106763 | -0.34570911 | -0.41629478 |
| MLXIPL      | -0.6175478  | -0.54816044 | -0.2916991  |
| PPP1R16A    | -0.61345434 | -0.41105207 | -0.1544743  |
| MYO15A      | -0.61245206 | -0.50874414 | -0.4764458  |
| PPARA       | -0.6100155  | -0.52676745 | -0.2550532  |
| SPP2        | -0.56862656 | -0.60999811 | -0.48472983 |
| ABCC11      | -0.40158633 | -0.60456873 | -0.14122552 |
| ASGR2       | -0.57713067 | -0.59260218 | -0.14436269 |
| KHK         | -0.58850678 | -0.47178375 | -0.43143206 |
| NBPF13P     | -0.52308524 | -0.58820299 | -0.23641594 |
| CAT         | -0.58201229 | -0.48705715 | -0.17731539 |
| ACOX2       | -0.5805449  | -0.51146067 | -0.17035512 |
| RP11-696N14 | -0.44797812 | -0.58037082 | -0.20508224 |
| NR2F6       | -0.5793919  | -0.40638654 | -0.07568358 |
| C1orf115    | -0.49538995 | -0.57895323 | -0.29549134 |
| PNPLA3      | -0.5771948  | -0.50713825 | -0.27690438 |
| NIT2        | -0.52382134 | -0.57681417 | -0.14232524 |
| MRPL43      | -0.57393552 | -0.38562571 | -0.15827949 |
| SERPINA4    | -0.45149394 | -0.57326362 | -0.32440388 |
| RP11-523H20 | -0.54741405 | -0.57173062 | -0.17175334 |
| SERPINA5    | -0.37963361 | -0.56949765 | -0.08028034 |
| GGH         | -0.30389191 | -0.56847041 | -0.19073397 |
| AKR1D1      | -0.46639569 | -0.56766263 | -0.14444751 |
| CLDN14      | -0.51014848 | -0.5653727  | -0.30077509 |
| ALAD        | -0.55652649 | -0.4414033  | -0.18171798 |
| AK4         | -0.37776613 | -0.55510821 | -0.15922689 |
| TTC31       | -0.54772171 | -0.40042391 | -0.17021992 |
| ITIH1       | -0.44793049 | -0.54564737 | -0.40092132 |
| TCEA3       | -0.45619391 | -0.54341951 | -0.17822105 |
| AGXT2       | -0.32841234 | -0.53910873 | -0.16157449 |
| SLC25A42    | -0.53807907 | -0.36450899 | -0.1477671  |
| SFXN5       | -0.496014   | -0.53339116 | -0.10562292 |
| C3          | -0.32496828 | -0.53334588 | -0.19602185 |
| SLC30A10    | -0.38143031 | -0.52019655 | -0.14638647 |
| ACADSB      | -0.35733082 | -0.51715283 | -0.24795962 |
| SLC13A5     | -0.44023114 | -0.51468042 | -0.15222536 |
| TMEM220     | -0.44426325 | -0.51422255 | -0.17672901 |
| ASGR1       | -0.5127561  | -0.48431379 | -0.25333637 |
| LPAL2       | -0.47613199 | -0.51093138 | -0.39565557 |
| CYP4F3      | -0.50927874 | -0.48591038 | -0.25675499 |
| PENT        | -0.47849196 | -0.50282158 | -0.10960301 |
| TSPAN9      | -0.39052741 | -0.5010383  | -0.27848634 |
| FGFR4       | -0.50079069 | -0.40955859 | -0.13279227 |
| AC004156.3  | -0.49601688 | -0.33194018 | -0.21406169 |
| CTA-292E10. | -0.2790415  | -0.49296135 | -0.06674447 |
| GALT        | -0.48939574 | -0.32661027 | -0.25067268 |
| RP11-513G11 | -0.32566644 | -0.48866387 | -0.34055702 |

Table S6

|             |             |             |             |
|-------------|-------------|-------------|-------------|
| RP11-44M6.3 | -0.48716407 | -0.36623863 | -0.30954343 |
| LRRRC37A5P  | -0.4311686  | -0.48715786 | -0.15025031 |
| BDH1        | -0.48419263 | -0.33955255 | -0.17721337 |
| SLC25A20    | -0.48393904 | -0.34051564 | -0.25802873 |
| FBP1        | -0.48272264 | -0.35558511 | -0.19250255 |
| FABP1       | -0.30753758 | -0.47627108 | -0.14891068 |
| EPHX2       | -0.47481538 | -0.43637706 | -0.11983633 |
| CYP8B1      | -0.32041968 | -0.47112259 | -0.42920673 |
| TOLLIP      | -0.4670631  | -0.37155505 | -0.16335049 |
| RP11-209K10 | -0.35233705 | -0.46683615 | -0.14848043 |
| SGK2        | -0.39416895 | -0.46457315 | -0.21429181 |
| USP30       | -0.45958095 | -0.46283748 | -0.2209904  |
| ACACB       | -0.35797062 | -0.46176925 | -0.13995571 |
| AC019181.2  | -0.39783467 | -0.45961561 | -0.13922621 |
| ACVR1C      | -0.38045717 | -0.45891588 | -0.1975675  |
| SEC14L2     | -0.43225002 | -0.45577579 | -0.16181266 |
| C1S         | -0.27588469 | -0.45447322 | -0.13211101 |
| RNF215      | -0.45336741 | -0.45261625 | -0.13819378 |
| LHPP        | -0.45207122 | -0.33877499 | -0.13117667 |
| ACSF2       | -0.45161505 | -0.28630564 | -0.13745067 |
| SMOC1       | -0.40655165 | -0.45031917 | -0.24273514 |
| SERPIND1    | -0.36698026 | -0.44786657 | -0.10223124 |
| EPHX1       | -0.4466512  | -0.2775992  | -0.20671552 |
| SDC2        | -0.3101171  | -0.44600249 | -0.08910975 |
| CLSTN3      | -0.35954896 | -0.43629611 | -0.19054808 |
| ACSM3       | -0.40360969 | -0.43359854 | -0.16447933 |
| RP11-273B20 | -0.42903237 | -0.38342987 | -0.19054808 |
| RBP5        | -0.42903235 | -0.38342977 | -0.21833985 |
| CNGA1       | -0.4261871  | -0.37338182 | -0.26794726 |
| CYB5A       | -0.30128304 | -0.42584528 | -0.32487033 |
| ZFAND2A     | -0.41998921 | -0.30812963 | -0.16147726 |
| KIAA1161    | -0.41780651 | -0.31125164 | -0.19585121 |
| NIPSNAP1    | -0.40921439 | -0.27157182 | -0.09060508 |
| CDHR3       | -0.31811406 | -0.40828798 | -0.17472495 |
| HMGCS2      | -0.35195098 | -0.40794621 | -0.25245225 |
| PGM1        | -0.29171942 | -0.40564516 | -0.14893822 |
| OGFR-AS1    | -0.40303212 | -0.28290761 | -0.18626344 |
| SLC47A1     | -0.38887493 | -0.40078725 | -0.28710292 |
| CHST13      | -0.38814415 | -0.32402455 | -0.16108369 |
| PC          | -0.2713548  | -0.38793794 | -0.09117777 |
| THRB-AS1    | -0.34943077 | -0.38575153 | -0.15415789 |
| SLCO2B1     | -0.38122455 | -0.26391129 | -0.1001516  |
| HLF         | -0.32957238 | -0.38009922 | -0.13643223 |
| PHYH        | -0.3720753  | -0.33485628 | -0.20637198 |
| HOGA1       | -0.31742346 | -0.37107901 | -0.2167836  |
| GPAM        | -0.36443184 | -0.34811237 | -0.15656816 |
| ANG         | -0.25749011 | -0.36109385 | -0.14350367 |
| NR1H3       | -0.35210006 | -0.27146195 | -0.171607   |
| ANXA9       | -0.26745198 | -0.35124338 | -0.24374089 |

Table S6

|           |             |             |             |
|-----------|-------------|-------------|-------------|
| RXRA      | -0.34948675 | -0.28767448 | -0.19439684 |
| C1RL-AS1  | -0.34870299 | -0.3393696  | -0.1800525  |
| IL6R      | -0.34129699 | -0.3463338  | -0.17232589 |
| AGFG2     | -0.34421296 | -0.29824866 | -0.09641845 |
| PPP1R26   | -0.3197786  | -0.29937873 | -0.46874021 |
| DDI2      | -0.31641086 | -0.26843984 | -0.22863211 |
| COBL      | -0.31078456 | -0.27482485 | -0.13529135 |
| RAB11FIP3 | -0.25547192 | -0.27748997 | -0.12321644 |
| OGG1      | -0.23787695 | -0.24669267 | -0.13166495 |
| FGD6      | 0.308960505 | 0.236207583 | 0.157679936 |
| OSTM1     | 0.29658056  | 0.311399251 | 0.172382997 |
| SLC43A2   | 0.280641011 | 0.312937726 | 0.291324095 |
| GNA13     | 0.315310025 | 0.261456232 | 0.168582794 |
| KLHL5     | 0.335375097 | 0.285531484 | 0.282554579 |
| ANKRD53   | 0.313974487 | 0.3549392   | 0.379928004 |
| MKL1      | 0.375310467 | 0.291027877 | 0.129868445 |
| USP37     | 0.381606158 | 0.340598244 | 0.203982094 |
| DUSP5     | 0.37846408  | 0.386244743 | 0.32466966  |
| AEN       | 0.384324073 | 0.408432424 | 0.439475721 |
| JAG1      | 0.41536706  | 0.274330693 | 0.14822603  |
| MXD1      | 0.429069833 | 0.330334463 | 0.326069469 |
| SYNJ2     | 0.434044595 | 0.377296784 | 0.110539577 |
| DNAJC10   | 0.41325387  | 0.434496382 | 0.273170175 |
| HSPBAP1   | 0.440346368 | 0.264763076 | 0.294401649 |
| C1QTNF1   | 0.44015928  | 0.444534134 | 0.717692761 |
| TAGLN2    | 0.410631525 | 0.446667451 | 0.473641547 |
| UBASH3B   | 0.359455849 | 0.449668577 | 0.60902063  |
| PPP1R12B  | 0.451087346 | 0.260029154 | 0.438599806 |
| SLC6A9    | 0.388165111 | 0.453161691 | 0.204339549 |
| PACS1     | 0.374660341 | 0.467571481 | 0.214192509 |
| MAFK      | 0.471025329 | 0.401034756 | 0.306618902 |
| TMEM184B  | 0.481630466 | 0.478697692 | 0.314189365 |
| LHFPL2    | 0.49123161  | 0.346824537 | 0.121837174 |
| SEL1L3    | 0.413177057 | 0.491640707 | 0.199188209 |
| DACT1     | 0.493396734 | 0.452295073 | 0.502994655 |
| GLIPR2    | 0.303163715 | 0.497178503 | 0.55035671  |
| TNFAIP8   | 0.416893454 | 0.509512265 | 0.203525768 |
| SMARCD3   | 0.377906081 | 0.514566689 | 0.168490718 |
| GATA2     | 0.407348652 | 0.516425777 | 0.153536264 |
| VCL       | 0.519639895 | 0.309331897 | 0.323716983 |
| NFKB2     | 0.376319496 | 0.520614223 | 0.415167074 |
| TNFRSF12A | 0.540172975 | 0.475554852 | 0.141978737 |
| SLC1A5    | 0.417498642 | 0.543489452 | 0.235416101 |
| C10orf54  | 0.270966738 | 0.552166164 | 0.190968291 |
| TUBB6     | 0.556252434 | 0.491547156 | 0.156049311 |
| STX11     | 0.589569559 | 0.557751235 | 0.385251444 |
| TPM4      | 0.420217884 | 0.599852113 | 0.248145079 |
| TRNP1     | 0.60679965  | 0.396134101 | 0.203000032 |
| MTHFD2    | 0.491592573 | 0.610179805 | 0.442349072 |

Table S6

|            |             |             |             |
|------------|-------------|-------------|-------------|
| ABCC1      | 0.602252697 | 0.621409834 | 0.608875583 |
| ARSJ       | 0.621802897 | 0.38518403  | 0.342238105 |
| RELB       | 0.401047262 | 0.62198863  | 0.261132113 |
| MYOF       | 0.62355697  | 0.479672522 | 0.2449567   |
| LRP8       | 0.442363469 | 0.624793464 | 0.231198247 |
| TEAD4      | 0.62582399  | 0.435645967 | 0.180064055 |
| ROBO1      | 0.628490964 | 0.55898068  | 0.093403626 |
| RECK       | 0.629476899 | 0.43788935  | 0.221737896 |
| RAB11FIP1  | 0.385998578 | 0.638469335 | 0.287472802 |
| SLC38A1    | 0.588848903 | 0.63944904  | 0.185752354 |
| VIM        | 0.505487077 | 0.644339332 | 0.131237001 |
| DNAJC6     | 0.653386652 | 0.566178783 | 0.148785634 |
| BICD1      | 0.653645784 | 0.566036138 | 0.259974015 |
| CYR61      | 0.65428371  | 0.475106685 | 0.406518772 |
| ABCA7      | 0.273735575 | 0.664557175 | 0.21762618  |
| MAP2       | 0.665740249 | 0.441906702 | 0.347107135 |
| FLRT2      | 0.666327567 | 0.550876944 | 0.3304459   |
| CSGALNACT  | 0.697211201 | 0.53962567  | 0.355055497 |
| FAM60A     | 0.69798662  | 0.576873459 | 0.186983675 |
| SLC7A7     | 0.719253637 | 0.656425014 | 0.468052765 |
| TNFRSF21   | 0.719694702 | 0.546953084 | 0.339465345 |
| SELM       | 0.56812723  | 0.719758395 | 0.284479748 |
| STX3       | 0.721029849 | 0.48367941  | 0.404779991 |
| SRGAP1     | 0.758608897 | 0.604731801 | 0.142706824 |
| AC006273.5 | 0.761592411 | 0.735830544 | 0.150602296 |
| SLC7A1     | 0.763431281 | 0.686349262 | 0.914014972 |
| DUSP4      | 0.767199069 | 0.565289109 | 0.416493558 |
| IL32       | 0.420361459 | 0.770590699 | 0.629588066 |
| PDZK1IP1   | 0.804195646 | 0.590929172 | 0.563587493 |
| EMILIN2    | 0.565521219 | 0.809275777 | 0.211410074 |
| CRIM1      | 0.813517637 | 0.572747295 | 0.25167943  |
| SLFN12     | 0.585871572 | 0.817637252 | 0.228924852 |
| SULT1C4    | 0.866619701 | 0.558533594 | 0.12904377  |
| CXCL1      | 0.893977743 | 0.496767088 | 0.219511068 |
| ETV4       | 0.895057992 | 0.771479384 | 0.167125588 |
| LOXL4      | 0.83770117  | 0.896403241 | 0.274880136 |
| SPINT1     | 0.901905301 | 0.813207289 | 0.389789985 |
| TESC       | 0.911545657 | 0.715589596 | 0.394336326 |
| SSPN       | 0.913338286 | 0.80776856  | 0.194461783 |
| ASNS       | 0.808192233 | 0.9686812   | 0.698038847 |
| ANXA3      | 0.982886526 | 0.654180672 | 0.622574687 |
| ITGB8      | 1.020499958 | 0.950670586 | 0.1825726   |
| C3orf52    | 1.056461919 | 0.74854065  | 0.229547628 |
| HSPB8      | 1.025749728 | 1.15133921  | 0.644371452 |
| VCAN       | 1.229051871 | 0.768855041 | 0.322518221 |
| LRRRC1     | 1.161178434 | 1.239454453 | 0.247953641 |
| DUSP8      | 1.116378379 | 1.335635054 | 0.433462398 |
| ID4        | 1.246928763 | 1.520771853 | 0.272307265 |
| DTNA       | 1.746428474 | 1.814806457 | 0.15827753  |
