# Supplementary material
Source: PubMed Central journal article supplement (PMC7788265)
Supplement: gutjnl-2019-318918supp005.pdf [file gutjnl-2019-318918supp005.pdf]

Table S7

| Gene         | Patients    |             | DEN-CDAHFD mice |             |
|--------------|-------------|-------------|-----------------|-------------|
|              | NASH        | HCV         | DENvsCTRL       | JQ1vsVEH    |
| DPPA4        | -2.4507221  | -1.23106239 | 0               | 0           |
| RP11-423H2.  | -0.8981717  | -0.81424236 | 0               | 0           |
| ABCC6P2      | -0.7590928  | -0.71193626 | 0               | 0           |
| KCNN2        | -0.90606881 | -2.50004133 | -0.931627       | 0.369597876 |
| CLRN1-AS1    | -0.73153087 | -0.93564645 | 0               | 0           |
| RP11-403I13. | -0.5794234  | -1.92072442 | 0               | 0           |
| GYG2         | -0.38149763 | -0.39142809 | 0               | 0           |
| RP11-205M3.  | -0.54051481 | -2.06149254 | 0               | 0           |
| AC114730.3   | -1.88267706 | -1.12903327 | 0               | 0           |
| U91319.1     | -2.17723502 | -2.6998997  | 0               | 0           |
| HSD17B3      | -0.07016258 | -0.43763102 | -0.07654996     | -0.4486277  |
| CES5A        | -0.64525921 | -1.2936248  | -0.90578743     | -0.49892739 |
| PZP          | -2.33951683 | -2.27410821 | -1.89256551     | 0.460043035 |
| ASXL3        | -0.51773769 | -1.80174824 | 2.006192447     | -0.13377795 |
| RP3-475N16.  | -0.5909234  | -0.9463459  | 0               | 0           |
| AGXT         | -0.33652657 | -0.88102219 | 0.147575972     | 0.14161338  |
| KCNK17       | -0.72715277 | -1.08999109 | 0               | 0           |
| HORMAD2      | -0.67208933 | -1.38550533 | 1.284613674     | -0.44712058 |
| CAPN3        | -0.81811361 | -0.04366222 | -0.51515617     | -0.19079849 |
| RP11-164J13  | -0.62709904 | -0.10401115 | -1.17841156     | -0.2449042  |
| GNMT         | -0.29267184 | -2.41590541 | 1.010281257     | 0.26511131  |
| NEU4         | -1.24589956 | -1.64577675 | 0               | 0           |
| SLC6A13      | -1.06465768 | -0.68898039 | -0.16949305     | 0.55297767  |
| RP11-626H12  | -1.31836203 | -1.20411441 | 0               | 0           |
| GCK          | -0.10053585 | -1.61542873 | -0.10077628     | 0.482348339 |
| KANK4        | -0.25690513 | -1.15128851 | 1.570048607     | -2.27236038 |
| PPP1R1A      | -0.93019699 | -2.41151278 | -5.29674348     | 0.503841536 |
| LPA          | -1.43751186 | -1.33928909 | 0               | 0           |
| CNDP1        | -0.28088602 | -1.81725563 | -1.7090469      | 0           |
| ATAD3C       | -0.81306887 | -1.64556101 | 0               | 0           |
| CYP1A2       | -0.6106617  | -1.07901831 | -0.7950747      | 0.015649635 |
| AOC1         | -0.56962461 | -2.81647926 | 3.770350404     | -1.9921775  |
| MAD1L1       | -0.32930869 | -0.33587188 | 0.857656748     | 0.081724681 |
| CHRNA4       | -1.45946397 | -1.34383243 | -3.87465579     | 1.033058417 |
| RP11-261N11  | -1.30424299 | -1.20062411 | 0               | 0           |
| ESPNL        | -2.4769282  | -1.86729984 | -2.04943545     | -2.11365241 |
| TMTC1        | -0.26168829 | -0.27488214 | -1.70976429     | -1.30673694 |
| CTNNA3       | -0.91502857 | -1.88329129 | -1.78373955     | -2.66894033 |
| GSTA2        | -0.58419009 | -2.5531672  | 2.185206483     | -0.09510108 |
| RP11-168L7.1 | -1.22721314 | -2.01955038 | 0               | 0           |
| ACSM2B       | -0.33382684 | -0.65137539 | -1.92818054     | 0.17164726  |
| MROH7        | -0.76689333 | -1.38750387 | -0.03374728     | -0.04267638 |
| SLC2A4RG     | -0.5415443  | -0.84280382 | 0               | 0           |
| LIME1        | -1.05835513 | -0.2993896  | -0.12974122     | 0.267678071 |
| NAT2         | -0.19735538 | -0.99639269 | -1.33816068     | 0.334036246 |
| MME          | -0.24925768 | -0.8803756  | 0.545426387     | -1.72077443 |
| APOC3        | -0.56279475 | -1.08184403 | 0.288061176     | 0.915129726 |

Table S7

|             |             |             |             |             |
|-------------|-------------|-------------|-------------|-------------|
| APOA1       | -0.40939164 | -0.21668626 | 1.190914197 | 0.573916331 |
| GCGR        | -0.58955599 | -0.5767726  | 0.938411736 | 0.384956281 |
| ACADS       | -0.70565231 | -1.51820922 | 1.758092665 | 0.102160445 |
| IGFALS      | -1.32097564 | -1.51965084 | 0.693432211 | 0.323948842 |
| CPNE6       | -1.12190128 | -1.46437968 | -1.18709776 | 0.46286219  |
| CYP2E1      | -0.7627884  | -1.28197243 | -0.67831191 | -0.38300503 |
| RP4-601P9.2 | -0.39274039 | -1.39791149 | 0           | 0           |
| THOP1       | -1.11509383 | -0.54056292 | 2.107654318 | -0.00972348 |
| GCDH        | -0.48476047 | -1.27241334 | -0.92194407 | 0.460733961 |
| FAM151A     | -1.12135117 | -2.98982685 | -1.5702119  | 0           |
| LINC00844   | -0.1218677  | -1.75685164 | 0           | 0           |
| AOX1        | -0.38577817 | -1.18870072 | -1.43001628 | -0.45441932 |
| TBX3        | -0.60130633 | -0.93023813 | 0.007045852 | 0.981308932 |
| TRIM55      | -0.6910777  | -0.86281811 | -6.69903967 | 0.234553058 |
| SLC22A25    | -0.5437881  | -0.26983561 | 0           | 0           |
| RBP4        | -0.47887111 | -0.80536509 | 0.735681873 | 0.540164558 |
| RP11-6B4.1  | -0.17847196 | -0.60049839 | 0           | 0           |
| PRODH2      | -0.78332363 | -0.86434985 | 1.08136555  | 0.368855852 |
| PCOLCE2     | -0.80597542 | -1.84255901 | -0.44575108 | 0.453881387 |
| CXXC4       | -0.61485678 | -1.31074769 | 0.274957302 | -1.66097517 |
| ORM2        | -0.30333097 | -1.71889822 | -0.06343897 | 1.316434752 |
| TRPC5       | -1.15054694 | -0.28614243 | 0           | 0           |
| GPR88       | -2.89485093 | -1.49832435 | 3.147354211 | 0.308501615 |
| CNPY3       | -0.3092391  | -1.03186197 | 1.590751373 | 0.112529546 |
| PPP1R32     | -0.57840839 | -0.51350346 | -0.29794567 | -0.1806172  |
| FITM1       | -0.40357267 | -2.11053874 | 1.445000192 | -0.71612594 |
| C1orf226    | -0.30378358 | -0.75137047 | 0           | 0           |
| PDLIM1P4    | -0.72270642 | -0.60970953 | 0           | 0           |
| RGN         | -0.14858348 | -0.4183961  | -1.9167989  | 0.263588983 |
| C3P1        | -0.73943892 | -1.13050933 | 0           | 0           |
| ETNK2       | -0.53797202 | -0.93367032 | -0.63448728 | 0.064088093 |
| CES1P1      | -0.7761245  | -1.13929196 | 0           | 0           |
| NAGS        | -0.58083731 | -1.33147303 | 1.389992177 | 0.680345386 |
| ZGPAT       | -0.52577405 | -0.30478141 | -0.31419239 | 0.012320437 |
| FADS6       | -1.43262387 | -1.34128149 | -0.97228235 | 0.244703225 |
| HAO2-IT1    | -1.17598425 | -2.19108814 | 0           | 0           |
| KBTBD11     | -0.26249717 | -1.00746047 | 2.168346681 | -2.12840606 |
| MAGI2-AS3   | -0.14851223 | -0.76988922 | 0           | 0           |
| SLC7A9      | -0.56499273 | -0.3207836  | 6.07179876  | -2.42213023 |
| GFRA1       | -0.6892832  | -0.60694963 | -0.64243638 | 0.383663324 |
| CTD-2529O2  | -1.38981285 | -1.96483991 | 0           | 0           |
| SNTG1       | -1.70290612 | -0.99997826 | -0.00397039 | 0.08353135  |
| RP11-113I22 | -1.04494523 | -2.42960165 | 0           | 0           |
| MEX3A       | -0.4014288  | -0.66929954 | 2.315320358 | -1.07390651 |
| TYK2        | -0.33689268 | -0.23456273 | 0.468043533 | -0.06874887 |
| MOGAT2      | -0.5169101  | -1.01258039 | 5.250420661 | 0.152784716 |
| Y_RNA       | -0.02346015 | -0.03847426 | 0           | 0           |
| SMO         | -0.72318166 | -0.72733049 | 0.532521578 | -0.50218122 |
| RP11-475O6  | -0.11944861 | -1.92619636 | 0           | 0           |

Table S7

|              |             |             |             |             |
|--------------|-------------|-------------|-------------|-------------|
| RP11-115J16  | -0.49042301 | -1.29195041 | 0           | 0           |
| RP11-417L19  | -0.93788756 | -2.43138449 | 0           | 0           |
| ALDH1L1-AS1  | -0.57678654 | -0.95671229 | 0           | 0           |
| AR           | -0.32841992 | -0.61937934 | -2.49324158 | 0.32984189  |
| WFIKKN1      | -1.10788814 | -0.29750899 | 2.165136394 | -0.46037337 |
| FAM35BP      | -0.45464905 | -0.67651761 | 0           | 0           |
| RP11-38L15.8 | -1.64139712 | -1.32215236 | 0           | 0           |
| CYP2D6       | -1.20083617 | -0.51736017 | -0.94229364 | -0.43734165 |
| ADH4         | -0.37327833 | -1.11196527 | -1.53500203 | 0.609926043 |
| SERPINC1     | -0.44191393 | -0.91356329 | -0.43584493 | 0.455704698 |
| GPER1        | -0.72430582 | -0.87864313 | 1.266493751 | -1.93593043 |
| FAM99B       | -0.42207339 | -0.64980146 | 0           | 0           |
| TSC2         | -0.51470298 | -0.32410602 | -0.13481896 | -0.05123888 |
| RP11-122K13  | -0.4282542  | -0.72525507 | 0           | 0           |
| PRAP1        | -0.48436789 | -1.00265954 | 1.77095802  | 1.00778092  |
| FUOM         | -0.43695938 | -1.04375595 | 1.915953556 | 0.232988149 |
| CHAD         | -0.43091584 | -1.4220108  | -3.18310492 | -0.80112361 |
| APOC2        | -0.20675667 | -0.49786674 | -0.02233224 | 0.047557307 |
| SLCO1B3      | -0.89080173 | -0.66958341 | -2.48171127 | 0.341457059 |
| ALDH1L1      | -0.57082842 | -1.04787036 | -1.01559717 | 0.723301237 |
| FMO3         | -0.23543892 | -0.60206838 | 2.875297708 | 1.513434232 |
| TM6SF2       | -0.53104662 | -0.87198264 | 0.562631286 | 0.309177783 |
| CAMSAP3      | -0.46330341 | -0.65140446 | 0.618070218 | 0.091779074 |
| RP11-403I13. | -0.0233169  | -0.38743239 | 0           | 0           |
| RP11-7F17.3  | -0.25850158 | -1.67971184 | 0           | 0           |
| RP11-830F9.5 | -0.85678038 | -0.89674626 | 0           | 0           |
| RP11-119D9.  | -0.62072299 | -1.15789688 | 0           | 0           |
| ECHDC3       | -0.87238459 | -0.53576085 | 0.261436014 | 0.171426061 |
| GJB1         | -0.74032789 | -0.73024293 | -0.34110883 | 0.392916013 |
| GSTA7P       | -0.38094262 | -1.78967174 | 0           | 0           |
| C11orf95     | -0.35732372 | -0.37193114 | 0.268295737 | -0.68122824 |
| MTND4P20     | -1.38003848 | -0.01431874 | 0           | 0           |
| LINC01018    | -0.19330424 | -1.40847214 | 0           | 0           |
| CTD-2227E11  | -0.63455959 | -1.13966826 | 0           | 0           |
| HAGH         | -0.51123608 | -0.84823497 | 0.17539993  | 0.407405153 |
| RP11-372E1.  | -0.75618594 | -1.35731764 | 0           | 0           |
| RP11-706C16  | -1.8182958  | -0.95521501 | 0           | 0           |
| JAKMIP2      | -0.84794167 | -0.85024754 | 0           | 0           |
| AP006216.5   | -0.8407068  | -0.49212248 | 0           | 0           |
| HPX          | -0.47391215 | -1.15407293 | 1.398815982 | 0.7837476   |
| ALB          | -0.2458638  | -0.35952139 | -1.14692879 | 1.177118787 |
| RP5-881L22.6 | -0.34488679 | -0.13488544 | 0           | 0           |
| PLEK2        | -0.64435404 | -0.2529252  | 1.701537791 | -0.39845232 |
| HGFAC        | -0.48818222 | -0.74951104 | 0.528136448 | -0.27896128 |
| ASB13        | -0.26497003 | -0.70081739 | -0.6209156  | 0.334717778 |
| GSTA1        | -0.11117712 | -0.86590608 | 2.185206483 | -0.09510108 |
| DGAT2        | -0.23072787 | -1.41493995 | 0.123781135 | -0.03783972 |
| NAT1         | -0.27645685 | -0.53341788 | -1.33816068 | 0.334036246 |
| RP1-152L7.5  | -0.30911418 | -0.60069461 | 0           | 0           |

Table S7

|             |             |             |             |             |
|-------------|-------------|-------------|-------------|-------------|
| PLGLA       | -0.27739169 | -0.75813594 | 0           | 0           |
| CBLN4       | -0.12831522 | -1.54643699 | 0           | 0           |
| AASS        | -0.22007565 | -0.09164529 | -2.0173792  | 0.26109611  |
| CYP4A11     | -0.49869444 | -1.10623146 | -0.6359834  | 0           |
| MIR5589     | -1.72874891 | -0.18734387 | 0           | 0           |
| GALK1       | -0.7519535  | -1.35456292 | 3.219229893 | -0.13235771 |
| RP11-260M19 | -0.2852025  | -0.72835784 | 0           | 0           |
| AC005077.7  | -0.27097686 | -0.91933251 | 0           | 0           |
| EFNA2       | -0.31150137 | -1.29236352 | 2.744371493 | 0.243325435 |
| LYNX1       | -1.18227612 | -0.93683614 | 0.165523239 | -0.7228945  |
| SPSB3       | -0.53165583 | -0.35051342 | 1.777595129 | 0.476983175 |
| KCNMA1      | -0.24697603 | -0.62288672 | 1.296712012 | -0.87672123 |
| C10orf11    | -0.12464857 | -0.45102332 | 2.064558967 | -0.48554937 |
| RP11-659E9  | -0.47785444 | -1.55485411 | 0           | 0           |
| CECR2       | -0.35329748 | -0.68030902 | -2.44960557 | 0.645066696 |
| ADRA1A      | -0.03227932 | -0.79471412 | -1.19251127 | 0.74664969  |
| APOA5       | -0.61599439 | -1.50134461 | 0.821289118 | -0.01486142 |
| IGF2        | -0.3554695  | -0.32240275 | 3.64590461  | 1.059241861 |
| INS-IGF2    | -0.87778826 | -0.36437642 | 0           | 0           |
| AADAT       | -0.72046157 | -0.74623036 | -1.71356825 | 0.152853722 |
| CTD-2587M2  | -0.5412677  | -0.38354822 | 0           | 0           |
| SLC10A1     | -0.31850288 | -0.65417388 | -1.38601116 | 0.6816232   |
| TMPRSS6     | -0.59352585 | -0.65294732 | 0.069943327 | 0.377556234 |
| CTC-575D19  | -0.31642712 | -0.51410749 | 0           | 0           |
| SCP2        | -0.31335254 | -0.53270357 | -1.82269257 | 0.332979648 |
| NR1I2       | -0.43067792 | -0.6574273  | -0.25274024 | 0.059786781 |
| ABAT        | -0.4028759  | -0.81071662 | -2.22533703 | 0.367021437 |
| GS1-124K5.1 | -0.3225718  | -0.13533062 | 0           | 0           |
| ECHDC2      | -0.39068656 | -1.10311048 | 0.743171356 | 0.355289239 |
| PON3        | -0.39865978 | -0.88263038 | -1.319244   | 0.487580055 |
| HAO2        | -0.22843085 | -1.39190186 | 2.261103306 | -1.9611097  |
| SLC22A7     | -0.66355035 | -0.50915312 | -1.3111788  | -0.68431735 |
| SLC9A3R2    | -0.40798399 | -0.85415824 | 2.106401906 | -0.55284649 |
| GRHPR       | -0.40528205 | -0.78253502 | 1.516292166 | 0.203233324 |
| SLC25A47    | -0.14854792 | -1.07642365 | 1.012148419 | 0.080138398 |
| CFHR5       | -0.36897879 | -1.51610778 | 0           | 0           |
| PLG         | -0.34222764 | -0.60941735 | -0.74696285 | 0.584784533 |
| AZGP1       | -0.39111322 | -1.18098557 | -0.5124546  | 0.293337404 |
| PCSK9       | -0.42595844 | -0.82264187 | -0.54931029 | 0.719658512 |
| NTHL1       | -0.7049843  | -1.34042858 | 2.148095313 | -0.05341062 |
| APOC1       | -0.18470404 | -1.0006866  | 0.502282887 | 0.013341656 |
| APOE        | -0.34329697 | -0.64483118 | 2.202667178 | 0.295330975 |
| AZGP1P1     | -0.2847023  | -0.88205065 | 0           | 0           |
| F2          | -0.54261288 | -0.91450234 | 0.263710189 | 0.334329669 |
| DFFB        | -1.2509295  | -0.77987858 | -0.4573144  | -0.21295245 |
| MAT1A       | -0.43932196 | -1.36668874 | -1.00723322 | 0.449695574 |
| EVPLL       | -0.13150388 | -0.17677127 | 0           | 0           |
| MFSD3       | -0.52085545 | -0.65716723 | 0.855843869 | -0.03364654 |
| GPT         | -0.8935722  | -1.29109863 | 0.890915753 | 0.320000945 |

Table S7

|              |             |             |             |             |
|--------------|-------------|-------------|-------------|-------------|
| SMLR1        | -0.36463885 | -0.7914789  | 0.218325963 | 0.754861645 |
| PPP1R1C      | -0.9073233  | -0.91938067 | -1.75455603 | 0           |
| CTD-2517M2   | -1.55194647 | -1.44049619 | 0           | 0           |
| SULT1A1      | -0.60385107 | -0.62471469 | -0.23120996 | 3.081608956 |
| ST3GAL6      | -0.19326731 | -0.80153534 | -0.54324814 | -0.39085762 |
| SLC25A34     | -0.77238145 | -0.38970654 | -0.66735736 | -0.00452284 |
| MGMT         | -0.37073273 | -1.17964964 | 0.577477414 | -0.05546817 |
| ZNF511       | -0.45825498 | -1.26275544 | 0.709545441 | 0.364165563 |
| TMEM105      | -1.95164925 | -0.83773835 | 0           | 0           |
| HSD17B10     | -0.66849793 | -1.12384999 | 0.183987948 | 0.046262234 |
| RP3-339A18.  | -0.62317886 | -0.22394972 | 0           | 0           |
| SERPINF2     | -0.4919938  | -1.01223112 | -0.15928417 | 0.61193406  |
| FBLN7        | -0.11005542 | -0.31799881 | 2.223166398 | -0.66546496 |
| SLC39A5      | -0.65327754 | -0.83531939 | 5.589404383 | -1.43937034 |
| SYAP1        | -0.17834441 | -0.41024031 | -1.25097975 | 0.143320352 |
| RP13-650J16  | -1.51618341 | -1.7720716  | 0           | 0           |
| DCXR         | -0.74689712 | -1.35499445 | 0.764920151 | 0.175225773 |
| TPCN2        | -0.8313272  | -0.05957462 | 2.200709632 | -0.7220059  |
| PON1         | -0.38788627 | -0.66869454 | -1.41895691 | 0.07353198  |
| FAHD1        | -0.16381536 | -0.49512726 | -0.01016767 | 0.475129144 |
| FOX2         | -0.20336137 | -0.46505531 | -0.97170544 | 0.403467754 |
| AZGP1P2      | -0.82469454 | -0.32681402 | 0           | 0           |
| TRABD2B      | -0.97431825 | -1.05816015 | 0.871749654 | -0.95454375 |
| PROX1-AS1    | -0.36316598 | -0.6555981  | 0           | 0           |
| C2orf72      | -0.53820929 | -0.54077596 | -0.59384386 | 0.552557179 |
| GNA11        | -0.03690947 | -0.56602609 | 1.078053937 | 0.055481262 |
| HAAO         | -0.58026982 | -1.05195289 | 0.276733571 | 0.222593489 |
| APOH         | -0.26309137 | -0.82622237 | -0.84214088 | 0.390449166 |
| THAP3        | -0.36273315 | -0.79358321 | 2.810345198 | -0.20705488 |
| SLC38A3      | -0.63324429 | -0.29342572 | -0.35798721 | -0.03123367 |
| AP006285.7   | -0.33618968 | -0.12187872 | 0           | 0           |
| RP11-223I10. | -0.67609863 | -0.65048699 | 0           | 0           |
| MSRB1        | -0.49656321 | -0.8226873  | 0.492008852 | 0.480986393 |
| SEMA4G       | -0.66731367 | -0.22269147 | -0.68880899 | 0.231510475 |
| UGT2B7       | -0.305407   | -0.56848741 | 0           | 0           |
| COL18A1      | -0.41754361 | -0.62289087 | 0.620871987 | 0.524233289 |
| TTR          | -0.55678518 | -1.02180884 | 0.21609858  | 0.903578942 |
| GC           | -0.28560178 | -0.70674607 | -0.90210264 | 0.710800277 |
| SLC6A12      | -0.39473516 | -0.12439678 | -0.62871429 | 0.474232057 |
| MT1X         | -0.00206655 | -3.42764884 | 3.453393608 | -0.36577852 |
| HPGD         | -0.07826363 | -0.32079332 | -1.49828973 | 0.430623134 |
| SKP2         | -0.23858658 | -0.12313172 | -0.67945484 | 0.191255554 |
| SULT1E1      | -0.58353044 | -1.30954036 | 4.801949177 | 1.484170159 |
| GOT2         | -0.2769067  | -0.11767656 | -0.37939954 | 0.29091663  |
| PROX1        | -0.08423018 | -0.29469943 | -1.18726553 | 0.17252713  |
| LCAT         | -0.64257954 | -1.24218556 | 0.474011255 | 0.046159316 |
| TP53I13      | -0.42701329 | -0.92210032 | 2.879401757 | -0.14477356 |
| CES3         | -0.62053334 | -1.16648046 | -0.61043096 | -0.22420003 |
| KLF15        | -0.59164921 | -0.84048457 | -0.23183555 | -0.28858504 |

Table S7

|             |             |             |             |             |
|-------------|-------------|-------------|-------------|-------------|
| BHMT        | -0.20300706 | -0.37372297 | -2.14830866 | 1.669828503 |
| HSD17B6     | -0.26812573 | -0.89045722 | 0.370656719 | -1.26535698 |
| CYP2C8      | -0.23249612 | -0.76444177 | -0.86972299 | -0.07718789 |
| MASP2       | -0.46779306 | -0.9360775  | -0.56567154 | 0.011683088 |
| FTCD        | -0.59879844 | -0.62859591 | -0.33266909 | 0.008021519 |
| ABCC6P1     | -0.24015412 | -0.74694993 | 0           | 0           |
| TDO2        | -0.06867423 | -0.75261121 | -1.95383107 | 0.085773158 |
| SEPP1       | -0.17664726 | -0.18374918 | -0.2507837  | 0.750967642 |
| PSAT1       | -0.34009565 | -0.49002442 | 3.213595979 | 0.617559821 |
| AC016768.1  | -0.02363364 | -0.42085007 | 0           | 0           |
| ESRP2       | -0.49172146 | -0.30389829 | -0.05632661 | 0.558652844 |
| REXO1       | -0.29182671 | -0.4211859  | 1.581837904 | -0.17446947 |
| BCKDHB      | -0.24370318 | -0.71368555 | -0.33431722 | -0.30249251 |
| WNK3        | -0.15905712 | -0.22928163 | 0.352477683 | -1.07582487 |
| GYS2        | -0.45581656 | -0.45763359 | -0.76279064 | -0.54374682 |
| SULT1A2     | -0.51268043 | -1.12560582 | -0.23120996 | 3.081608956 |
| TOMM40      | -0.12174364 | -0.48823351 | 1.77851661  | -0.04286913 |
| GRB14       | -0.36811991 | -0.63719688 | -0.39535197 | 0.526064356 |
| ALDH7A1     | -0.17675211 | -0.66511301 | -0.84170433 | 0.623383574 |
| SEC14L4     | -0.5382041  | -0.66216824 | -1.85793727 | 0.056451825 |
| MLXIPL      | -0.5354669  | -0.6665602  | -0.44527549 | -0.2886265  |
| RAC3        | -0.75021392 | -0.79184558 | 2.634619203 | -0.69151508 |
| NUGGC       | -0.51425539 | -0.04135724 | 5.593062494 | 1.318953129 |
| F7          | -0.7449175  | -0.64762101 | 0.086624837 | 0.477092957 |
| RTP3        | -0.13700222 | -0.76433408 | -1.00514674 | 0.540725624 |
| CES1        | -0.38847274 | -0.48002304 | -0.92751108 | -0.1869952  |
| RFNG        | -0.5666767  | -0.86934766 | 0.932425941 | 0.307167056 |
| GPS1        | -0.49637507 | -0.56191508 | 0.09244829  | 0.464884199 |
| PPP1R16A    | -0.66588538 | -1.16891665 | 1.936710343 | -0.10531233 |
| TTBK1       | -0.98803758 | -0.92991057 | 0.339716042 | -1.59495314 |
| KLHDC10     | -0.41965456 | -0.0699715  | -0.85557043 | 0.259357281 |
| MYO15A      | -0.57503812 | -0.33774502 | -0.64982178 | -0.61349401 |
| RP5-834N19. | -0.47214717 | -0.23215604 | 0           | 0           |
| GAMT        | -0.53283533 | -0.72363615 | 0.69790966  | 0.214843579 |
| IYD         | -0.20919488 | -0.59368668 | -1.21238669 | 0.488694851 |
| MPST        | -0.61847694 | -0.78239759 | 1.852932173 | 0.23516254  |
| RP11-418J17 | -0.43838718 | -0.65151276 | 0           | 0           |
| CPN2        | -0.60398791 | -0.51493189 | -0.52943291 | 0.437544958 |
| PSMB7       | -0.40525092 | -0.66821393 | -0.34080458 | 0.396926671 |
| PPARA       | -0.28934477 | -0.29598282 | -2.84370795 | -0.0336332  |
| SPP2        | -0.06856169 | -0.7928673  | 0.344000538 | 0.250544663 |
| HFE2        | -0.39775836 | -0.81608454 | 0.780313336 | 0.867591515 |
| DMRTA1      | -0.36923061 | -0.48582693 | -1.33684892 | -1.12986747 |
| SORD        | -0.62275595 | -1.1135615  | -0.83284752 | 0.380380311 |
| FAM99A      | -1.08120792 | -0.93121458 | 0           | 0           |
| XAB2        | -0.43267853 | -0.5872996  | 1.462522495 | -0.15605664 |
| GPRC5C      | -0.48218755 | -0.73894611 | -0.16660075 | 0.067566146 |
| PKD2        | -0.28839901 | -0.85685678 | -0.31266876 | -0.34790859 |
| ACOT6       | -0.65614173 | -0.6506756  | 0.83354589  | 0.342630761 |

Table S7

|              |             |             |             |              |
|--------------|-------------|-------------|-------------|--------------|
| COX10-AS1    | -0.26374465 | -0.38975016 | 0           | 0            |
| ST18         | -0.30923317 | -0.14815859 | 4.232897175 | -1.26287725  |
| NRBP2        | -0.4174886  | -0.40955707 | 0.167782975 | -0.07923623  |
| ABCC11       | -0.86535097 | -0.02023343 | 0           | 0            |
| PGRMC1       | -0.23327907 | -0.53660825 | -1.5712967  | 0.357539992  |
| PLIN4        | -0.49893815 | -0.9539915  | -0.18895289 | -1.19252671  |
| FES          | -0.26472874 | -1.01619583 | 1.347775258 | -0.3654185   |
| SLC45A3      | -0.40501816 | -0.97874371 | -0.01502737 | 0.072461151  |
| TMEM176A     | -0.49646486 | -1.15494974 | 1.848398319 | 0.036745806  |
| MBL2         | -0.69868288 | -0.20276982 | -0.96041173 | 0.724885005  |
| SLC16A2      | -0.52357903 | -0.29847871 | -1.26089015 | 0.112883593  |
| ADH1B        | -0.22272349 | -0.98338219 | 0.36909949  | 0.206302281  |
| NOS1AP       | -0.34365977 | -0.44382282 | -0.70086698 | -0.074444043 |
| SLC44A1      | -0.08968774 | -0.16455541 | -1.26845269 | 0.123190703  |
| TDGF1        | -1.89008927 | -0.61044714 | 0           | 0            |
| ACSM5        | -0.70498262 | -0.34860538 | -1.75028876 | -0.27559677  |
| DHTKD1       | -0.28780214 | -0.28827486 | -2.27438109 | 0.006376649  |
| ANPEP        | -0.44870785 | -0.82958075 | 0.084798275 | 0.049386018  |
| AP000695.6   | -0.61630157 | -0.52944868 | 0           | 0            |
| TMEM110-MU   | -0.80527465 | -0.32791006 | 0.581388107 | 0.127617248  |
| MIR3646      | -0.04350225 | -0.65031917 | 0           | 0            |
| NUDC         | -0.12283606 | -0.88058138 | 2.089600363 | -0.30174911  |
| TMEM176B     | -0.48094142 | -1.05263084 | 1.742196011 | 0.02487796   |
| DGAT1        | -0.09773453 | -0.89548079 | 0.441501776 | -0.10478743  |
| CNTLN        | -0.1389144  | -0.2701225  | -0.20296246 | -0.72879252  |
| ASGR2        | -0.2987114  | -0.68716783 | 0.293105094 | -0.23476606  |
| NLRP14       | -0.08707569 | -0.42367853 | 0           | 0            |
| RAVER1       | -0.1292519  | -0.15620543 | 1.179006393 | -0.02131146  |
| PLIN5        | -0.61053996 | -1.07468021 | 1.063843727 | 0.475832532  |
| RAPSN        | -0.68408735 | -0.00115935 | 1.044269816 | -1.05373096  |
| KHK          | -0.61005479 | -1.00295435 | 1.429467849 | 0.026311738  |
| NBPF13P      | -0.50473553 | -0.73410418 | 0           | 0            |
| CEACAM22P    | -0.6938149  | -0.85363777 | 0           | 0            |
| SLC43A1      | -0.56829874 | -0.40032971 | 0.146549491 | -0.27279143  |
| HNF1A        | -0.46342037 | -0.6827916  | 1.396800665 | -0.06264034  |
| CMYA5        | -0.4169838  | -0.41421177 | -5.93267418 | -2.16547059  |
| PQLC1        | -0.53523251 | -0.85692464 | 0.360411102 | 0.182908119  |
| LRR3         | -0.67704592 | -0.2589194  | -0.67788957 | 0.406459243  |
| LRR3-AS1     | -1.07459726 | -0.79009512 | 0           | 0            |
| CHID1        | -0.49327456 | -0.95109205 | 0.682781932 | 0.576794671  |
| KLKB1        | -0.35422343 | -0.74266281 | -1.20243197 | 0.333895347  |
| CTB-50L17.14 | -0.61615336 | -0.75733158 | 0           | 0            |
| HSD17B14     | -0.97380077 | -3.43013153 | 3.178145273 | -1.73786156  |
| MGST1        | -0.18759852 | -0.63465881 | -1.08415088 | 0.422860394  |
| ARID3C       | -0.8793646  | -0.52052863 | 0.934029435 | -2.06894716  |
| CAT          | -0.37921384 | -0.78696601 | -1.78200034 | 0.212121099  |
| RP11-252E2.  | -0.58921679 | -0.6413635  | 0           | 0            |
| SLC22A10     | -0.54427978 | -0.10490981 | 0           | 0            |
| ACOX2        | -0.78620648 | -0.78830167 | -0.56946643 | 0.309990988  |

Table S7

|             |             |             |             |             |
|-------------|-------------|-------------|-------------|-------------|
| RP11-696N14 | -0.84493446 | -0.24456115 | 0           | 0           |
| GLYAT       | -0.54519501 | -0.9709644  | -1.09043764 | 0.475681466 |
| NR2F6       | -0.38560677 | -0.93696277 | 1.623280256 | 0.360672069 |
| RNF128      | -0.28440722 | -0.25186554 | -0.73277949 | 0.368536777 |
| C1orf115    | -0.2251882  | -0.76811722 | -0.10632989 | 0.398969901 |
| SNAPC4      | -0.22650239 | -0.11961156 | 0.428910591 | -0.22165435 |
| SNED1       | -0.15384695 | -0.30487056 | -0.67448113 | -0.43054319 |
| PNPLA3      | -0.27193537 | -0.09097557 | -0.00056543 | -0.20904869 |
| SCG5        | -0.07358165 | -0.62591564 | 2.785404572 | -1.88108896 |
| NIT2        | -0.32812463 | -0.75156051 | -1.22067187 | 0.430420737 |
| TST         | -0.50893589 | -0.75996646 | 1.950168325 | 0.151972823 |
| GGACT       | -0.80052539 | -1.12210102 | 0.428597512 | 0.064021905 |
| GSTZ1       | -0.80412727 | -1.20105822 | -0.93531312 | 0.207531697 |
| MRPL43      | -0.4666328  | -0.68585312 | 1.386897223 | 0.325829171 |
| SLC27A5     | -0.77792301 | -1.1779547  | -1.10913859 | 0.193671952 |
| BCAT2       | -0.09917677 | -0.78345609 | 1.328475344 | 0.198484704 |
| POLE        | -0.54468836 | -0.06241185 | -0.47473271 | 0.218634138 |
| SERPINA4    | -0.65080972 | -0.42859245 | 0           | 0           |
| ABCG8       | -0.47869189 | -0.11226664 | -0.21816252 | -0.36071007 |
| TEF         | -0.36272388 | -0.14550333 | -1.34774246 | -0.04928715 |
| LBX2        | -0.8532518  | -1.3155267  | 2.494707967 | -0.12219597 |
| LBX2-AS1    | -0.14928032 | -0.52155161 | 0           | 0           |
| RP11-523H20 | -0.07324914 | -1.11574703 | 0           | 0           |
| BPHL        | -0.33468245 | -0.62649583 | -0.40547113 | 0.193648318 |
| PACSIN3     | -1.07206375 | -1.51556614 | 1.263819286 | 0.297110525 |
| ASPG        | -0.79261857 | -1.4390274  | 0.207198931 | -0.27699693 |
| SERPINA5    | -0.58397378 | -0.51793313 | 0.983551908 | -0.60822897 |
| CA14        | -1.0363896  | -0.54710027 | -1.21025073 | 0.766703469 |
| GGH         | -0.09944419 | -1.06340289 | 0.356019241 | 0.070370367 |
| AKR1D1      | -0.61880369 | -1.0676664  | -2.72593865 | 0.634054931 |
| HNF1A-AS1   | -1.07500327 | -0.43845219 | 0           | 0           |
| PKD1        | -0.34928737 | -0.49107191 | 0.030363006 | -0.40039418 |
| C8orf82     | -0.49552816 | -1.1681896  | 0           | 0           |
| TTC36       | -0.59208703 | -1.53502211 | 0.412443545 | 0.591365431 |
| CLDN14      | -0.85268107 | -0.75450766 | 1.756882662 | 0.128411987 |
| PROC        | -0.61859226 | -0.9470801  | 0           | 0           |
| HNF4A       | -0.48537504 | -0.40547763 | -0.8011589  | 0.185900889 |
| KCTD21-AS1  | -0.86402868 | -0.74058551 | 0           | 0           |
| NDUFA6-AS1  | -0.75071851 | -0.44210541 | 0           | 0           |
| IVD         | -0.46524827 | -0.50877386 | -0.48883276 | -0.12867121 |
| SLC25A10    | -0.66641428 | -0.68847993 | 0           | 0           |
| DNAJC12     | -0.6283231  | -1.695647   | 0.515684335 | 0.884294829 |
| ITIH4       | -0.59324242 | -0.79847195 | -0.30719039 | 0.982591155 |
| RP5-966M1.6 | -0.32412675 | -0.80088394 | 2.218156442 | -0.27857819 |
| CBS         | -0.43363463 | -0.88974174 | 0.147965212 | 0.221481821 |
| VIL1        | -1.22220723 | -1.39021968 | 4.14252667  | -1.82374784 |
| FTCDNL1     | -0.05761247 | -0.84931732 | 0           | 0           |
| TMEM25      | -0.49532423 | -0.57250106 | -1.00021659 | 0.472030898 |
| ALAD        | -0.56335032 | -0.6178861  | 0.718664146 | -0.41390672 |

Table S7

|              |             |             |             |             |
|--------------|-------------|-------------|-------------|-------------|
| POMT2        | -0.3247902  | -0.03791069 | -0.63961182 | 0.557114212 |
| SLC19A1      | -0.27601945 | -0.45907593 | 1.535184457 | -0.0071566  |
| AK4          | -0.34284033 | -0.02810523 | -1.34493399 | 0.03739559  |
| MOGAT1       | -0.50864505 | -0.22872663 | -0.68591912 | -1.39354425 |
| PCYT2        | -0.59491452 | -0.587816   | 0.345643853 | 0.486129721 |
| RP4-758J18.2 | -0.17419048 | -0.53221071 | 0           | 0           |
| CCNL2        | -0.05350519 | -0.09091779 | -1.06760448 | -0.00910597 |
| QDPR         | -0.57305241 | -0.85748197 | -1.00600095 | 0.544484296 |
| GNAO1        | -0.79643866 | -0.70999546 | -0.15119239 | -0.82072856 |
| SAT2         | -0.62937422 | -0.88015374 | -0.11184796 | 0.668059415 |
| NUDT16       | -0.21782162 | -0.36298601 | 0.523764613 | -0.47581685 |
| ABHD15       | -0.22205575 | -0.67744666 | -0.4450189  | 0.566860031 |
| RP3-402G11.  | -0.98140848 | -0.69587218 | 0           | 0           |
| SELO         | -0.68214808 | -0.67197017 | -0.10957756 | 0.126337557 |
| TMEM110      | -0.90234925 | -0.60042962 | 0.581388107 | 0.127617248 |
| AMBP         | -0.37015464 | -0.94413321 | 0.689415007 | 0.719059077 |
| PHGDH        | -0.63145205 | -0.98314732 | 3.508312007 | 0.161426583 |
| ALKBH2       | -0.35000912 | -0.7987394  | 3.059956783 | 0.33956247  |
| XYLB         | -0.49290218 | -0.46450529 | -0.5619052  | 0.519951045 |
| TTC31        | -0.2701114  | -0.15256623 | 0           | 0           |
| C1R          | -0.41261905 | -1.19884538 | -0.63758813 | -0.13542597 |
| STEAP3       | -0.27141357 | -0.3232459  | 1.444581406 | -0.13308154 |
| PMM1         | -0.66139494 | -0.80266303 | 2.385028199 | 0.310917459 |
| C16orf13     | -0.52374861 | -0.9550174  | 1.391037141 | -0.19937936 |
| ITIH1        | -0.40822372 | -1.26829524 | -0.6039896  | 0.297082406 |
| SHMT2        | -0.35397619 | -0.8877449  | 0.568911421 | 0.261389219 |
| SH3PXD2A     | -0.58938999 | -0.90497988 | -0.97356762 | -0.04386584 |
| ASL          | -0.54135086 | -0.58256593 | 0.315368405 | 0.334276643 |
| NDUFS7       | -0.35223236 | -0.76830728 | 2.822963873 | -0.18318038 |
| NAPEPLD      | -0.32020048 | -0.20161623 | 0.052960895 | 0.754243667 |
| TCEA3        | -0.39952876 | -1.18078015 | 0.778537275 | -0.40543229 |
| SUGP1        | -0.39628952 | -0.47110729 | 0.288388284 | -0.04930485 |
| VTN          | -0.44614781 | -0.61042422 | 0.556573322 | 0.794597888 |
| SHANK3       | -0.32842138 | -0.25487302 | 0.746072307 | -0.81380288 |
| ECHS1        | -0.38267837 | -0.84368604 | -0.57357267 | 0.200970474 |
| MFAP3L       | -0.14093197 | -0.56108907 | -1.43605614 | -0.55196625 |
| MRPL23       | -0.48427608 | -0.80982467 | 0.950737335 | 0.060701693 |
| MIR126       | -1.47349672 | -0.45010185 | 0           | 0           |
| AGXT2        | -0.26358289 | -1.05744694 | -0.9913399  | -0.13192309 |
| SLC25A42     | -0.65612664 | -0.57297845 | -0.4979975  | 0.135799611 |
| MARC1        | -0.4616936  | -0.67749173 | -0.37541296 | 0.321632559 |
| ELP3         | -0.26401312 | -0.15074368 | -0.18713189 | 0.099629538 |
| DAB1         | -0.28298333 | -0.38255978 | 1.44027818  | -1.03835384 |
| TMEM37       | -0.37077912 | -0.94358344 | 2.008048556 | 0.562554913 |
| GULOP        | -0.43069123 | -0.39825511 | 0           | 0           |
| ASPSCR1      | -0.38345114 | -0.42199433 | 1.21878853  | 0.097902396 |
| GNE          | -0.2455501  | -0.75925254 | 0.777437212 | 0.002945869 |
| SLC25A18     | -0.32635209 | -0.21909345 | -1.6233079  | 1.299404448 |
| SLC46A1      | -0.79670586 | -0.70856786 | 0.573357638 | 0.35205969  |

Table S7

|              |             |             |             |             |
|--------------|-------------|-------------|-------------|-------------|
| SFXN5        | -0.54079603 | -0.57629718 | -0.42703572 | -0.30886883 |
| C3           | -0.38763206 | -0.70278501 | -0.28740991 | 1.039457609 |
| ICAM3        | -0.27723121 | -0.69113664 | 0           | 0           |
| TTPAL        | -0.38842257 | -0.73380663 | -0.97361866 | 0.441153194 |
| CTNS         | -0.13640506 | -0.06808933 | -0.75384921 | -0.20052393 |
| PRKAG2-AS1   | -0.71312727 | -0.89928971 | 0           | 0           |
| ABCG5        | -0.27781841 | -0.20585278 | -0.69166486 | -0.02735932 |
| PROZ         | -0.87058357 | -0.46779426 | -0.70479135 | 0.552491006 |
| SUOX         | -0.26995605 | -0.41722897 | -1.50014633 | 0.123148903 |
| FAM53A       | -1.34052183 | -0.81855426 | 0.088058257 | 0.143845339 |
| SPTBN2       | -0.80740352 | -0.35626365 | 0.182960193 | 0.247748846 |
| CASC10       | -0.69520747 | -0.93311633 | 0           | 0           |
| LCN12        | -0.26713476 | -0.87038823 | 0.062128635 | 0.191021322 |
| C8G          | -0.57468221 | -0.80100824 | 0.420297155 | -0.11974103 |
| SIGMAR1      | -0.37741406 | -0.76295689 | 0.268600186 | 0.826853425 |
| MLYCD        | -0.58388552 | -0.78159264 | 1.154985287 | 0.139233254 |
| CPPED1       | -0.19588188 | -0.83837278 | -0.87158706 | 0.219395597 |
| APOF         | -0.46270578 | -1.63843659 | -0.16643542 | 0.525010646 |
| ABCC2        | -0.33845758 | -0.02173253 | -2.38011745 | -0.07692772 |
| HPN          | -0.51873642 | -0.99416798 | 1.040091404 | 0.266029143 |
| PKLR         | -0.96329091 | -0.4731071  | -0.1710823  | -0.60816379 |
| RAD54L2      | -0.34953813 | -0.00772237 | -2.08980949 | -0.06599881 |
| RP5-875H18.  | -0.97441634 | -0.05396903 | 0           | 0           |
| CMBL         | -0.42361597 | -0.64957924 | -0.60565685 | 0.24309112  |
| RP11-390F4.2 | -0.12267721 | -0.74180674 | 0           | 0           |
| SLC30A10     | -0.63668659 | -0.11120664 | -2.59696857 | 1.209207738 |
| ACADSB       | -0.66415257 | -1.05673676 | -2.19239063 | -0.03858801 |
| ITCH         | -0.07400923 | -0.30715213 | -2.10857483 | 0.23087938  |
| MIR122       | -0.27105962 | -0.63102949 | 0           | 0           |
| RP11-661A12  | -1.0068164  | -1.92305277 | 0           | 0           |
| SLC13A5      | -0.42868528 | -1.19539529 | 0.782827673 | -1.7061129  |
| TMEM220      | -0.48361796 | -0.54619079 | -1.51020916 | 0.138628961 |
| PRKAG2       | -0.19203878 | -0.15858696 | -1.18251038 | 0.177794695 |
| TADA1        | -0.30389333 | -0.36947123 | -0.80004944 | 0.196595046 |
| ASGR1        | -0.39248104 | -0.91763274 | 0.19094474  | 0.509030549 |
| DOLPP1       | -0.34741768 | -0.51219965 | 0.406577097 | 0.331817911 |
| FXDY1        | -1.06420331 | -1.02384475 | 1.150356923 | -0.04012396 |
| PCK2         | -0.56978258 | -1.12463001 | 2.485520794 | -0.32361604 |
| DHRS4        | -0.58176346 | -0.97563092 | 0.291885109 | 0.145110743 |
| PGLYRP2      | -0.84706281 | -0.32329112 | 0.281336844 | 0.124699523 |
| LPAL2        | -0.37628717 | -0.24212963 | 0           | 0           |
| AC142528.1   | -1.29217617 | -0.72544589 | 0           | 0           |
| AGPAT2       | -0.2614578  | -1.30771679 | 1.121800941 | 0.459562652 |
| PEBP1        | -0.32506038 | -0.76046978 | 0           | 0           |
| HIBADH       | -0.33410414 | -0.55182101 | -1.4082294  | 0.096862796 |
| CYP4F3       | -0.2665262  | -0.51545601 | 3.757352868 | -0.95009315 |
| RG512        | -0.57454486 | -0.58327237 | 0.89994273  | -0.29993358 |
| TNFAIP8L1    | -0.36056345 | -0.3039113  | 1.070496991 | 0.525208492 |
| RP11-407B7.  | -0.54535569 | -1.02360153 | 0           | 0           |

Table S7

|             |             |             |             |             |
|-------------|-------------|-------------|-------------|-------------|
| DCTD        | -0.23862439 | -0.29141796 | 2.942049864 | -0.64848505 |
| MRPS22      | -0.18247279 | -0.41518208 | -0.23917551 | 0.249346273 |
| DBT         | -0.14445026 | -0.30654564 | -2.149208   | 0.182669571 |
| PAOX        | -0.73269053 | -0.71989324 | -1.6003457  | 0.394558202 |
| PAIP2B      | -0.39698838 | -0.63530655 | -1.72219379 | 0.287665619 |
| MPC1        | -0.00152835 | -1.12736321 | -0.0594223  | -0.07937519 |
| NDRG2       | -0.31842761 | -0.71282285 | -1.00538565 | 0.182364998 |
| PEMT        | -0.59869992 | -1.07088446 | 0.637737504 | 0.332165739 |
| ALDH8A1     | -0.47933895 | -0.34232888 | -1.25867769 | 0.456978399 |
| TSSC1       | -0.6524941  | -0.77835846 | 0.851081347 | 0.3646474   |
| AP001065.15 | -0.87613974 | -0.08523425 | 0           | 0           |
| TSPAN9      | -0.36274604 | -0.41022723 | 0.824459942 | 0.17954032  |
| FGFR4       | -0.84466308 | -0.52219796 | 1.002820707 | 0.223755146 |
| ZNF444      | -0.648907   | -0.5494435  | 0.998838902 | 0.118021012 |
| LINC00094   | -0.2356437  | -0.53746288 | 0           | 0           |
| FAM73B      | -0.39044713 | -0.20109973 | 0.372022369 | 0.385818181 |
| TTPA        | -0.48765707 | -0.74043882 | -1.00539429 | 0.431762502 |
| CTD-2545H1. | -0.33631689 | -0.46832027 | 0           | 0           |
| TFR2        | -0.53218059 | -0.97155978 | -0.19776122 | 0.444648846 |
| FLCN        | -0.64468395 | -0.52512804 | -0.2498599  | -0.28046311 |
| ACAA1       | -0.55832654 | -0.81170487 | 0.686636556 | 0.11561066  |
| FURIN       | -0.28325597 | -0.63288246 | 0.64209436  | 0.010651209 |
| SALL1       | -0.46199645 | -0.39733207 | -0.4822282  | 0.173940341 |
| ZNF696      | -0.18533551 | -0.23374923 | 0           | 0           |
| RNF126      | -0.41953799 | -0.43267775 | 2.563128783 | 0.184691357 |
| AC004156.3  | -1.08457874 | -0.70364242 | 0           | 0           |
| POLR3H      | -0.53867307 | -0.93570313 | 0.957927572 | 0.08088269  |
| GHR         | -0.1827679  | -0.13073588 | -2.29981144 | 0.016144387 |
| ACP2        | -0.51429543 | -0.53974254 | -0.41515062 | 0.164247317 |
| ZNF497      | -0.62888286 | -0.45092334 | 0           | 0           |
| ZBTB48      | -0.44558566 | -0.54510362 | 0.977325838 | 0.095960112 |
| FAM20C      | -0.26916105 | -0.87752018 | 1.007265865 | 0.165581995 |
| NAT8        | -0.04774105 | -0.09651174 | 0.705114068 | -0.2101434  |
| HPD         | -0.47119318 | -0.52211752 | 0.257173431 | 0.291001902 |
| ADI1        | -0.32875552 | -0.88318212 | -0.97963624 | 0.406260335 |
| CTA-292E10. | -0.61463776 | -0.94459549 | 0           | 0           |
| SNHG8       | -0.3885628  | -0.86430197 | 0           | 0           |
| BNIP3       | -0.11974501 | -0.79971838 | -1.19704826 | 0.103345321 |
| ZNF517      | -0.71609491 | -0.38050494 | 0           | 0           |
| EHHADH      | -0.21599818 | -0.34444992 | -1.61945738 | 0.695650813 |
| RP11-449P15 | -0.529043   | -0.01401733 | 0           | 0           |
| GET4        | -1.10074438 | -0.14827759 | 0.789491208 | 0.283343786 |
| TBC1D2      | -0.74601009 | -0.55556537 | 1.728027251 | 0.03357927  |
| SFXN1       | -0.29650873 | -0.28034586 | -1.19736932 | 0.417448201 |
| FBXW11P1    | -0.25842395 | -0.92298745 | 0           | 0           |
| TTC6        | -0.16019604 | -0.52302249 | -1.98459234 | -0.2315565  |
| GALT        | -0.60259549 | -0.67287157 | 0.980493758 | 0.349768793 |
| MRPL20      | -0.25110988 | -0.64343605 | 1.261873216 | 0.141437232 |
| RP11-513G11 | -0.42124821 | -0.22074738 | 0           | 0           |

Table S7

|             |             |             |             |             |
|-------------|-------------|-------------|-------------|-------------|
| ZBTB45      | -0.21878266 | -0.1079143  | 2.814966798 | -0.21095617 |
| EDC3        | -0.09290885 | -0.01902446 | -0.47382401 | 0.142315614 |
| AC009166.5  | -0.46116019 | -0.55750509 | 0           | 0           |
| PCBD1       | -0.62343799 | -1.17142332 | -0.02149932 | 0.352433634 |
| RP11-44M6.3 | -0.62538841 | -0.77398596 | 0           | 0           |
| LRRC37A5P   | -1.4949825  | -0.6939784  | 0           | 0           |
| OSGIN1      | -0.78322939 | -0.38862248 | 3.626452882 | 0.221686146 |
| DEPDC7      | -0.30464535 | -0.47928419 | -1.07028273 | 0.542173695 |
| TMEM82      | -0.56732666 | -0.99211059 | 1.76597135  | 0.755734291 |
| SLC26A1     | -0.93810053 | -0.31986911 | -1.30102052 | 0.3988583   |
| HSBP1L1     | -0.37467011 | -0.88578097 | 0.220470118 | 0.646250462 |
| THRB        | -0.32045112 | -0.31120054 | -1.92158123 | 0.061091271 |
| ENTPD5      | -0.44530291 | -0.29483671 | -1.30622372 | 0.199678681 |
| PKD1L2      | -0.35780234 | -1.00867416 | 3.643219436 | -0.80749385 |
| BDH1        | -0.40847211 | -0.51262771 | 0.410121216 | -0.17422228 |
| SLC25A20    | -0.42134512 | -0.57574441 | -0.28069522 | 0.411094556 |
| RDH16       | -0.69961363 | -0.90174228 | 0           | 0           |
| MYD88       | -0.25047133 | -0.37232038 | 0.632530558 | 0.083277407 |
| MPLKIP      | -0.48490885 | -0.84739524 | -0.36737989 | 0.421042762 |
| FBP1        | -0.24166971 | -0.49343109 | 0.187883464 | 0.502182298 |
| SOWAHB      | -0.32586866 | -0.37339702 | 0.414876102 | 0.761918379 |
| FUBP3       | -0.11029061 | -0.22231808 | -0.79117826 | 0.069404834 |
| CYP27A1     | -0.55690332 | -0.88349417 | -0.56542922 | 0.748437821 |
| IL11RA      | -0.85746262 | -0.36602985 | 0           | 0           |
| SLC27A2     | -0.16020915 | -0.74830749 | -0.84756506 | 0.243884954 |
| ZNF385B     | -0.38910069 | -0.5771255  | -1.85475151 | 0.059889039 |
| DEAF1       | -0.08303319 | -0.28714167 | 1.066759776 | -0.03110666 |
| POLR2F      | -0.22893025 | -0.70111964 | 2.553232095 | -0.05250184 |
| MMACHC      | -0.47301601 | -0.59763845 | -0.88987416 | 0.084178781 |
| RP11-344P13 | -0.39996927 | -0.45573736 | 0           | 0           |
| IDUA        | -0.17471939 | -0.36929699 | 1.027115166 | -0.15407296 |
| HDHD3       | -0.64024419 | -0.74348062 | 0.02707614  | 0.310149246 |
| FABP1       | -0.17117168 | -0.5675242  | -0.87873391 | 0.574257629 |
| SCCPDH      | -0.13835336 | -0.72535707 | 0.200658428 | -0.1971062  |
| EPHX2       | -0.55580656 | -0.77394145 | -1.12821712 | 0.265609966 |
| TTC38       | -0.4785725  | -0.82906739 | -0.1821671  | 0.128283017 |
| PCDH1       | -0.55498688 | -0.88196897 | -0.03088989 | 0.462190624 |
| C19orf66    | -0.41574106 | -0.75454268 | 0.514377945 | 0.829082493 |
| CFB         | -0.08069209 | -0.86641732 | 0           | 0           |
| MTHFD1      | -0.24793039 | -0.6193901  | -0.74763333 | 0.192620416 |
| CYP8B1      | -0.39722099 | -0.67081877 | -0.11971815 | 1.020162268 |
| TRIM24      | -0.14690973 | -0.29798113 | -0.7871406  | -0.22313694 |
| FKBP8       | -0.45534144 | -1.03670196 | 2.219258372 | 0.095813259 |
| PEX6        | -0.74151621 | -0.62556105 | 1.51360758  | -0.20851173 |
| BTD         | -0.51880871 | -0.50186324 | 0.428997633 | 0.203553467 |
| SLC6A1      | -0.66780318 | -0.05242181 | -0.58529227 | 1.284248743 |
| RANBP1      | -0.194188   | -0.57187374 | 0.952132148 | 0.344334294 |
| RP11-38G5.4 | -0.26812771 | -1.17908542 | 0           | 0           |
| TOLLIP      | -0.37509006 | -0.59443591 | -0.97826386 | 0.154265679 |

Table S7

|             |             |             |             |             |
|-------------|-------------|-------------|-------------|-------------|
| LGI4        | -0.37823075 | -0.05688356 | 1.316726844 | -0.29316781 |
| RP11-209K10 | -0.41472663 | -0.28326213 | 0           | 0           |
| OPLAH       | -0.65896031 | -0.98607565 | 0.335848598 | -0.09601228 |
| SGK2        | -0.52259356 | -0.33546409 | -0.53766711 | 0.373037889 |
| EI24        | -0.29859245 | -0.37239322 | -1.00493807 | 0.409769358 |
| CYP4F11     | -0.50365337 | -0.60430695 | -0.6359834  | 0           |
| WDR18       | -0.26303469 | -0.80343687 | 1.134463114 | 0.124934226 |
| TOLLIP-AS1  | -1.01910709 | -0.96845316 | 0           | 0           |
| USP30       | -0.32035688 | -0.59223782 | 0.472811192 | -0.06999459 |
| ABCG2       | -0.48328026 | -0.69633905 | 0.836600358 | -0.52113891 |
| ACACB       | -0.49664018 | -0.61214431 | -0.65669018 | 0.083492367 |
| AHCY        | -0.73209204 | -0.68778703 | -0.75825353 | 0.138258963 |
| ABCC6       | -0.65634783 | -0.36438224 | -0.03368974 | 0.147387369 |
| GLS2        | -0.59292292 | -0.54243895 | -0.68354741 | -0.03480728 |
| AC019181.2  | -1.02266815 | -1.07113673 | 0           | 0           |
| ACVR1C      | -0.11652767 | -0.35008002 | -3.1212476  | 1.157937025 |
| F10         | -0.28230454 | -0.56833053 | 0.283606342 | 0.758443798 |
| ZKSCAN1     | -0.36168698 | -0.21361593 | -1.48943274 | 0.284545913 |
| ADCY1       | -0.81148915 | -0.97305651 | 3.470521668 | -0.23322546 |
| CHMP6       | -0.20590671 | -0.39920899 | 1.798924317 | 0.265866433 |
| RPL7AP6     | -0.4702246  | -0.66199388 | 0           | 0           |
| SEC14L2     | -0.75546165 | -0.67290959 | -0.49668518 | 0.475825713 |
| C7orf50     | -0.04986888 | -0.08085842 | 1.185214477 | -1.10080083 |
| FAH         | -0.48538971 | -0.69808226 | -0.34755423 | 0.435036529 |
| CLUH        | -0.62216832 | -0.50627332 | -0.4291588  | 0.379146556 |
| PPP6R2      | -0.60696935 | -0.37289816 | -0.55911679 | -0.01846265 |
| C1S         | -0.24333759 | -0.68776094 | -1.31336006 | 0.520638609 |
| FANCC       | -0.83149984 | -0.48837318 | 0.08540546  | 0.4008986   |
| SLC25A13    | -0.26677068 | -0.47695618 | -1.52059362 | 0.485937484 |
| RAPH1       | -0.51958729 | -0.02189156 | -1.06426181 | -0.01003368 |
| RNF215      | -0.3064139  | -0.1027603  | 0.945168405 | -0.0525064  |
| PAH         | -0.40321861 | -0.15844776 | -1.78433282 | -0.0157304  |
| GCSH        | -0.21442025 | -0.80755575 | -0.69232622 | 0.628196444 |
| LHPP        | -0.23139448 | -0.72840562 | 0.199198087 | -0.18034108 |
| TFDP2       | -0.05611059 | -0.07030701 | -1.61476219 | 0.142666909 |
| KDM8        | -0.42484203 | -1.36695814 | 0.012812333 | 0.06917546  |
| ACSF2       | -0.30709126 | -0.43313341 | -1.04944327 | -0.08307248 |
| RAB26       | -0.89089924 | -0.68789995 | 2.374557829 | -1.10826931 |
| SMOC1       | -0.35628209 | -0.95580899 | -0.41519089 | 0.520182393 |
| AL161668.5  | -0.22841744 | -1.49444603 | 0           | 0           |
| TPPP2       | -0.28308336 | -1.26846498 | -1.08441724 | -0.49892753 |
| IPO5        | -0.15031268 | -0.18134521 | -0.42205522 | 0.040831232 |
| ZC3H7B      | -0.25751247 | -0.12998183 | -0.33722032 | -0.30796501 |
| RP4-584D14. | -0.13616521 | -0.82351346 | 0           | 0           |
| RARRES2     | -0.51733897 | -1.15441677 | 1.41162687  | -0.54532646 |
| POLM        | -0.29587248 | -0.40396695 | 0.911555104 | -0.18382754 |
| RP11-713M15 | -0.56784251 | -0.67548248 | 0           | 0           |
| GPR146      | -0.31837514 | -0.56382517 | 0.167804366 | 0.136060853 |
| MOCS1       | -0.56598929 | -0.94277482 | -0.16789565 | 0.038985097 |

Table S7

|             |             |             |             |             |
|-------------|-------------|-------------|-------------|-------------|
| SERPIND1    | -0.36433476 | -0.54751351 | -0.94902242 | 0.482225695 |
| TACO1       | -0.21320353 | -0.72224437 | -1.27544446 | 0.354371053 |
| EPHX1       | -0.28063641 | -0.74574771 | -0.06093992 | 0.317855387 |
| SDC2        | -0.22556491 | -0.57809391 | -1.39524853 | 0.614605394 |
| RP11-45M22  | -1.58453288 | -0.09215897 | 0           | 0           |
| TOP1MT      | -0.19592005 | -0.44240036 | -0.01967597 | 0.478417322 |
| FAAH        | -0.44039703 | -0.57822996 | -0.45873059 | 0.193819305 |
| SLC22A1     | -0.58787038 | -0.81758857 | 0.654380241 | -0.1431791  |
| CTD-2619J13 | -0.35564684 | -0.40817897 | 0           | 0           |
| PUF60       | -0.30059789 | -0.54650994 | 1.124693204 | 0.072554165 |
| GLYCTK      | -0.60284451 | -0.97975949 | -0.39659    | 0.438932788 |
| ARFGAP2     | -0.45218896 | -0.46795598 | -0.39975494 | 0.408404768 |
| PXMP2       | -0.4881838  | -1.11330067 | -0.12353625 | 0.327770673 |
| RAB40C      | -0.22958853 | -0.59450239 | 0.891792263 | 0.034322159 |
| PPL         | -0.61851932 | -0.55818806 | 0.984931902 | 0.048278601 |
| ESD         | -0.11785903 | -0.55054689 | -0.06858429 | 0.360972554 |
| IQGAP2      | -0.19521028 | -0.28828367 | -2.32545394 | 0.41993806  |
| DECR2       | -0.42247838 | -0.95881494 | -0.51077099 | -0.0258893  |
| ARMC6       | -0.52188393 | -0.90539794 | 1.960689668 | -0.1115392  |
| POLE2       | -0.44417791 | -0.51280515 | -0.16191817 | -0.29120384 |
| CDO1        | -0.17641426 | -0.74297117 | -0.32659079 | 0.636883117 |
| ITIH3       | -0.17687276 | -0.94474302 | -0.14955883 | 1.427932756 |
| SP5         | -1.16930887 | -0.60647473 | 1.692550056 | 0.604902577 |
| MAL2        | -0.17671074 | -0.03593147 | -1.06543405 | 0.338904105 |
| SMARCA1     | -0.15775212 | -0.14897645 | -1.2607967  | 0.310418274 |
| AP1M1       | -0.36320922 | -0.54158329 | 0.866434061 | 0.035003187 |
| SH2D3A      | -0.06220165 | -0.88533737 | 0           | 0           |
| CLSTN3      | -0.34702917 | -0.14263637 | 0.555628696 | -0.40762097 |
| RP11-736K20 | -1.00805007 | -0.62729986 | 0           | 0           |
| MAOB        | -0.27187357 | -0.50486289 | -2.15272882 | 0.518392044 |
| ACSM3       | -0.18749289 | -1.08892629 | -1.52128655 | -0.05553252 |
| PITPNM2     | -0.48013077 | -0.65254067 | 0.395601177 | -0.12027729 |
| ALDH6A1     | -0.38489841 | -0.95685424 | -2.32477743 | 0.269798749 |
| EPB41L4B    | -0.0826497  | -0.4055006  | -1.48429374 | 0.423200309 |
| SCLY        | -1.07964622 | -0.15225378 | -0.09283406 | 0.541860873 |
| OAF         | -0.52814481 | -0.72171453 | 0.847582659 | 0.33117069  |
| ALDH4A1     | -0.47580799 | -1.00831378 | -0.33564559 | 0.141838529 |
| ARRDC1      | -0.52138906 | -0.47714318 | 2.990251031 | -0.68397362 |
| KCTD21      | -0.34297509 | -0.56146811 | -0.51214728 | 0.312665918 |
| MTSS1       | -0.19510625 | -0.3383132  | -1.34296732 | -0.11049268 |
| RP11-273B20 | -0.76603378 | -0.29070261 | 0           | 0           |
| RBP5        | -0.5074025  | -1.33154462 | 0           | 0           |
| AGL         | -0.13892479 | -0.2584053  | -1.74233287 | 0.403262825 |
| AKT2        | -0.47148654 | -0.54488782 | -0.39340418 | 0.186806474 |
| DHRS1       | -0.60010248 | -0.81540492 | 0.090543857 | 0.35348514  |
| SS18L1      | -0.45106035 | -0.28580329 | -1.14838361 | 0.114264606 |
| LDHD        | -0.65891188 | -0.95056606 | -0.22490965 | 0.318725747 |
| CNGA1       | -0.17867747 | -0.77377703 | -0.14622646 | -2.1705831  |
| CYB5A       | -0.09117741 | -0.94241306 | -0.47941346 | 0.163295008 |

Table S7

|              |             |             |             |             |
|--------------|-------------|-------------|-------------|-------------|
| GPD1         | -0.53575567 | -0.60968965 | 0.166464994 | 0.636987918 |
| CRLS1        | -0.20436687 | -0.17181501 | -0.27399503 | 0.566922322 |
| EEF1D        | -0.13428722 | -0.53718877 | 1.306221248 | 0.239191655 |
| RNF43        | -0.74609979 | -0.2049906  | 0.261325873 | 0.235747948 |
| SND1         | -0.00203854 | -0.13960798 | 0.181510483 | 0.218435827 |
| STARD10      | -0.57276771 | -0.73704566 | 1.859549092 | 0.464751927 |
| UNC119B      | -0.25380792 | -0.30897855 | 0.416633742 | 0.163717477 |
| CYP4F2       | -0.36045997 | -0.62944681 | -0.6359834  | 0           |
| RAPGEFL1     | -0.00239378 | -1.08691723 | 0.148413363 | -0.45368472 |
| CCS          | -0.49443009 | -0.85795208 | 0.856597364 | 0.126366793 |
| C1RL         | -0.13229616 | -0.98484046 | -0.47649523 | 0.139194688 |
| RABEPK       | -0.2636037  | -1.44311962 | 0.222917952 | 0.347129754 |
| SLC25A1      | -0.60905518 | -0.61217066 | -0.08175965 | 0.6427495   |
| XRCC5        | -0.35313783 | -0.49939172 | -0.53846462 | 0.178249614 |
| RTTN         | -0.55806435 | -0.56112151 | -0.18359583 | -0.30765485 |
| AC091729.9   | -0.37236568 | -0.33586159 | 0           | 0           |
| ZFAND2A      | -0.21742422 | -0.50420706 | -0.05441296 | 0.02362571  |
| FAM50B       | -0.42153988 | -0.51363646 | 1.81131769  | 2.2735793   |
| ZCCHC24      | -0.17894189 | -0.66392385 | -1.74206427 | 0.036693211 |
| KIAA1161     | -0.58070193 | -0.21244501 | -0.69259857 | 0.752757637 |
| Orai3        | -0.61091595 | -0.71333185 | 0.737057791 | 0.225511905 |
| RTKN         | -0.31297368 | -0.75354601 | 2.597154009 | -0.03659894 |
| ARVCF        | -0.25776641 | -0.5305933  | 1.905100627 | -0.49761871 |
| RANBP10      | -0.44671    | -0.15976826 | -0.23094044 | 0.321424936 |
| GGCX         | -0.35753643 | -0.29633656 | -1.17526956 | 0.425197586 |
| RAI14        | -0.07972112 | -0.28490066 | -0.68173902 | 0.11360125  |
| SEC24B       | -0.09487704 | -0.35842347 | -0.37224824 | -0.10759558 |
| DHRS4-AS1    | -0.52475691 | -0.55896136 | 0           | 0           |
| HGD          | -0.35878196 | -0.350345   | -1.00708728 | 0.324993934 |
| AK2          | -0.16295448 | -0.23871102 | 0.093294213 | 0.215400617 |
| COMT         | -0.18096877 | -0.58405637 | 0.757679301 | 0.310580422 |
| RP11-390F4.1 | -0.77075652 | -1.06407999 | 0           | 0           |
| IGSF8        | -0.51010641 | -0.63304243 | 3.14539471  | -0.46399986 |
| CNNM3        | -0.5357055  | -0.31557983 | 0.125173439 | 0.113170885 |
| CDA          | -0.18017056 | -1.16763043 | 3.805225862 | 0.005384301 |
| NIPSNAP1     | -0.32977211 | -0.5501257  | -0.7603948  | 0.292077669 |
| MARC2        | -0.29551764 | -0.90581941 | 0.077117995 | 0.126590341 |
| RMDN2        | -0.16407356 | -0.76096038 | 0           | 0           |
| CDHR3        | -0.42393349 | -0.50445259 | 1.702187068 | -1.84567841 |
| CDKN2AIPNL   | -0.2501421  | -0.61219483 | 0.666830905 | 0.261673911 |
| HMGCS2       | -0.51161936 | -0.95288541 | -0.19486523 | 0.113717139 |
| RUNDC3B      | -0.12603728 | -0.29779997 | 0.104563551 | -0.36998818 |
| PAQR9        | -0.14636922 | -0.07822544 | -0.96897232 | 1.168992177 |
| PGM1         | -0.47498436 | -0.81038452 | -0.70871111 | 0.467082941 |
| CLU          | -0.35188411 | -0.89453091 | 1.345006854 | 0.354722898 |
| METTL7B      | -0.0262913  | -0.11145938 | 0.847525283 | 0.346557938 |
| OGFR-AS1     | -0.81148179 | -0.47865038 | 0           | 0           |
| OGFR         | -0.09167407 | -0.33567436 | 1.543076959 | 0.506863441 |
| CNP          | -0.14064985 | -0.16671442 | 1.050621433 | 0.085587015 |

Table S7

|              |             |             |             |             |
|--------------|-------------|-------------|-------------|-------------|
| ALDH2        | -0.2450598  | -1.21905795 | 0.832167125 | -0.21119086 |
| SMARCD2      | -0.11194545 | -0.43592284 | 0.13706474  | 0.164433486 |
| SLC47A1      | -0.53450149 | -0.97880953 | -1.34514051 | 0.169919586 |
| MYH14        | -0.43920616 | -0.10483396 | 2.019104986 | -0.07675168 |
| SNTB1        | -0.05112808 | -0.45770179 | -3.40623768 | 0.217046392 |
| ZNF3         | -0.26090674 | -0.03641455 | 0           | 0           |
| PHYHD1       | -0.50156338 | -0.85436303 | -0.68577419 | 0.20933336  |
| CSAD         | -0.67536946 | -0.31910446 | 0.581288877 | 0.361037643 |
| ACSL1        | -0.23042221 | -0.74203104 | -1.84455824 | 0.378280344 |
| CLDN15       | -0.53244456 | -0.52282538 | 5.469574579 | -0.00660456 |
| ZER1         | -0.50581496 | -0.15318588 | 0.596670285 | -0.0408556  |
| RP11-384L8.1 | -0.5545044  | -0.92011913 | 0           | 0           |
| CMTM8        | -0.6823316  | -0.83866236 | 0.461617953 | 0.227280379 |
| LRP1         | -0.33361829 | -0.48620276 | 0.083306979 | 0.230791296 |
| PKP2         | -0.11010405 | -0.37567763 | -0.35857822 | 0.571795207 |
| SLC25A27     | -0.00858287 | -0.11575953 | 1.614062024 | -0.58160061 |
| CYP39A1      | -0.16475563 | -0.36884305 | 1.693663284 | 0.400273214 |
| RNF220       | -0.26617305 | -0.12581337 | 1.281298608 | -0.08010066 |
| RP5-1033H22  | -0.48556974 | -1.05283657 | 0           | 0           |
| ECI2         | -0.22460245 | -0.86098402 | -1.56844139 | -3.72333767 |
| SIRT7        | -0.3233897  | -0.3420124  | 0.739241002 | -0.06708959 |
| FZD4         | -0.1981602  | -0.38083081 | -1.22512062 | 0.215680344 |
| SUV39H1      | -0.5763003  | -0.44670947 | -0.61505082 | -0.01023166 |
| TCF7L1       | -0.1799368  | -0.28271731 | 1.170916194 | -0.66281991 |
| CHST13       | -0.89177197 | -0.61902947 | 0.294194829 | 0.844669208 |
| NFIC         | -0.27189754 | -0.37267128 | 0.375770164 | 0.030550402 |
| PC           | -0.29160991 | -1.17632304 | 0.673272199 | 0.157581308 |
| SESN2        | -0.32828331 | -0.55331287 | 0.840246705 | 0.007664631 |
| AFMID        | -0.49801886 | -0.78466857 | -1.96018452 | 0.067092856 |
| NR0B2        | -0.21821663 | -0.74988167 | 2.010790365 | -0.04288177 |
| SLC12A7      | -0.34208224 | -0.1356076  | -0.6469558  | -0.06878134 |
| CAPN5        | -0.4033786  | -0.51007466 | 1.317492521 | -0.15267142 |
| THRB-AS1     | -0.36720374 | -0.41791686 | 0           | 0           |
| ABHD6        | -0.1015885  | -0.7656913  | -0.37415986 | 0.136053731 |
| ATXN7L1      | -0.0145751  | -0.30378261 | -0.88440011 | -0.13332301 |
| TALDO1       | -0.24767501 | -0.78271113 | 1.410679326 | 0.42807833  |
| DGCR8        | -0.27555124 | -0.14939869 | -0.70079596 | -0.0205326  |
| ATP5SL       | -0.33080778 | -0.40326734 | -0.04346006 | -0.24135963 |
| ZBTB42       | -0.33223844 | -0.36217411 | 1.336172006 | 0.209351582 |
| AKT1         | -0.12136597 | -0.03562776 | 1.715983436 | -0.29820626 |
| PANX2        | -1.05063915 | -0.39582192 | 4.594807693 | -2.01544048 |
| MTFR1        | -0.16423046 | -0.36601861 | -1.35516483 | 0.357613874 |
| SHMT1        | -0.95748502 | -0.27885397 | -1.30607816 | 0.360082191 |
| GCH1         | -0.36003341 | -0.26825249 | -0.67075574 | -0.15324311 |
| F12          | -0.61410815 | -0.70508875 | 0.814596232 | 0.405561967 |
| MTM1         | -0.01754821 | -0.09779642 | -1.6293212  | 0.179664875 |
| NME4         | -0.54279338 | -0.73919801 | 2.038055623 | 0.069220804 |
| SLCO2B1      | -0.57184593 | -0.17415803 | -1.01840302 | -0.05504877 |
| RASSF7       | -0.36910342 | -0.8050493  | 1.654448506 | 0.124724727 |

Table S7

|             |             |             |             |             |
|-------------|-------------|-------------|-------------|-------------|
| RP11-655M14 | -0.14550184 | -0.09514789 | 0           | 0           |
| TBX10       | -1.13049769 | -0.70421272 | 0           | 0           |
| NUDT8       | -1.49847795 | -0.91917749 | 0           | 0           |
| PSMA7       | -0.22669379 | -0.57109765 | 0.839753706 | 0.339615771 |
| TRMT2A      | -0.48289986 | -0.79773337 | 0.976037816 | 0.078959422 |
| EEFSEC      | -0.37402267 | -0.47734615 | 0.517233002 | 0.533413645 |
| HLF         | -0.10748365 | -0.19107919 | -1.35321048 | -0.07818146 |
| PEX16       | -0.42734208 | -0.78543505 | 1.062633581 | 0.248407593 |
| PARP10      | -0.19436102 | -0.4484908  | 1.048978431 | -0.00927603 |
| RP11-134G8. | -0.12783833 | -0.42461731 | 0           | 0           |
| GRTP1       | -0.60611273 | -0.95303413 | 0.835272449 | 0.15801091  |
| HDLBP       | -0.14432791 | -0.63828812 | -0.97234768 | 0.621178204 |
| MAVS        | -0.37338731 | -0.2275035  | -0.71060657 | 0.113459428 |
| EPN1        | -0.43365549 | -0.62992085 | 1.253402748 | 0.316027501 |
| IRF2BP1     | -0.42333204 | -0.6221342  | 1.595265808 | 0.019644743 |
| GPR75-ASB3  | -0.15543723 | -0.66256616 | -0.68920518 | 0.378535703 |
| TMEM80      | -0.52025025 | -0.08655757 | 0.078423491 | -0.05554496 |
| C16orf70    | -0.44378911 | -0.25961305 | -0.57205608 | -0.05569468 |
| SLC35D1     | -0.28339417 | -0.16921591 | -1.15791111 | 0.460476356 |
| SCAP        | -0.50545673 | -0.21284561 | -0.07020301 | 0.178437669 |
| MDN1        | -1.05286174 | -0.53708268 | -1.48412412 | -0.16491655 |
| ADCK3       | -0.36461965 | -0.51763721 | -1.12041668 | 0.686507425 |
| HSD11B2     | -0.36083317 | -0.71740565 | 1.592042811 | -1.78110708 |
| PHYH        | -0.27412928 | -0.53346132 | -1.33952641 | 0.197979479 |
| MMP15       | -0.3303784  | -0.36468617 | 1.07605296  | -0.54300191 |
| HOGA1       | -0.65393367 | -0.94213665 | -0.04547694 | 0.098159949 |
| RHCE        | -1.55564776 | -1.00908741 | 0           | 5.405284777 |
| ARL6IP4     | -2.03428444 | -0.27072871 | 1.809170058 | 0.098088305 |
| AQP3        | -0.3528123  | -1.10181191 | 3.309573109 | -2.04933029 |
| LRR1        | -0.20406273 | -0.25479093 | -0.59880382 | 1.89503555  |
| SETD1A      | -0.21076718 | -0.13777425 | 0           | 0           |
| TMEM57      | -0.1765725  | -0.52275641 | -1.00926874 | 0.361224519 |
| EPS8L2      | -0.5632656  | -0.41341366 | 1.233425543 | 0.218775029 |
| AP000355.2  | -0.37559045 | -0.44169068 | 0           | 0           |
| GPAM        | -0.34373559 | -0.59624817 | -3.48403241 | 0.271022858 |
| FOXA3       | -0.09840643 | -0.3723538  | 0.179672385 | 0.310516764 |
| PIPOX       | -0.3791097  | -0.67558097 | -1.71133727 | -0.08279865 |
| EPHB4       | -0.73796153 | -0.42942632 | 1.346683007 | -0.11378486 |
| TMEM192     | -0.22265003 | -0.54736054 | 1.142861769 | 0.234902807 |
| ANG         | -0.36225448 | -1.24858536 | 0           | 0           |
| SMPDL3A     | -0.21452152 | -0.55704711 | 0.063182874 | -0.32270712 |
| NT5DC3      | -1.18788436 | -0.37112618 | 0           | 0           |
| WDR81       | -0.63466213 | -0.28957769 | 0.660153175 | 0.166841117 |
| RAP2C       | -0.18716392 | -0.00925047 | -1.39549748 | 0.208586415 |
| RP11-350G8. | -0.44483067 | -0.21784855 | 0           | 0           |
| EPB41L5     | -0.10746465 | -0.41755287 | -1.18928906 | 0.386102189 |
| CERS2       | -0.31848739 | -0.45482055 | -0.82165747 | 0.320449929 |
| GTF2IRD1    | -0.40105621 | -0.2883253  | 0.463011775 | 0.027636843 |
| PEX19       | -0.25189527 | -0.54810423 | -0.65622249 | 0.174438863 |

Table S7

|            |             |             |             |             |
|------------|-------------|-------------|-------------|-------------|
| AKAP1      | -0.24917411 | -0.47800008 | -0.76396159 | 0.191473091 |
| SH2D4A     | -0.10061868 | -0.28585087 | 1.113822077 | -0.24542284 |
| NR1H3      | -0.4650762  | -0.68817094 | 0.812945362 | 0.12937213  |
| PDIK1L     | -0.20859359 | -0.03174983 | -1.7333156  | 0.293676568 |
| ANXA9      | -0.3007713  | -0.63743673 | 2.2928718   | -0.45997582 |
| PFKFB1     | -0.3297327  | -0.44200144 | 0.403612537 | 0.187269597 |
| KANK2      | -0.00637189 | -0.38191586 | -0.12852561 | 0.107234883 |
| SHH        | -0.26822776 | -0.45890702 | -2.16663755 | 0.257278378 |
| TMEM101    | -0.54529918 | -0.46586506 | 1.541413786 | 0.057109208 |
| RXRA       | -0.57915104 | -0.69315154 | -0.08779213 | 0.180950246 |
| HPCAL1     | -0.32247245 | -0.48823218 | 1.172660884 | -0.37900549 |
| C1RL-AS1   | -0.4031912  | -0.11197287 | 0           | 0           |
| KIF1C      | -0.30583385 | -0.48631973 | -0.2171284  | 0.330805596 |
| IDNK       | -0.43685108 | -0.96508025 | 0.316402559 | -0.0242497  |
| SIVA1      | -0.44212158 | -0.58775093 | 2.796533789 | 0.128500991 |
| ELK1       | -0.18653408 | -0.30904162 | -0.60000592 | -0.17635459 |
| IL6R       | -0.51172412 | -0.69087763 | -1.52245202 | 0.050230795 |
| NEIL1      | -0.51310013 | -0.60761121 | 0.952554416 | 0.129057032 |
| SERPINF1   | -0.37117075 | -0.85545096 | 0.144772245 | -0.19908239 |
| FCGRT      | -0.29415287 | -0.86959944 | 1.306387738 | -0.26875955 |
| AGFG2      | -0.3857784  | -0.53938538 | -0.26316735 | 0.446899028 |
| MUM1       | -0.29462687 | -0.24667722 | 0.909793174 | -0.26679508 |
| ABHD14A    | -0.50505346 | -0.7321509  | 1.120512151 | 0.585822565 |
| CLASRP     | -0.38266283 | -0.50477986 | 0.589909066 | -0.26330925 |
| MLX        | -0.06171253 | -0.54230894 | -0.57474698 | 0.545632578 |
| ACY1       | -0.78836943 | -0.29907273 | 0.132530764 | 0.288427905 |
| STARD5     | -0.65785772 | -1.14394873 | -0.71249542 | 0.304776591 |
| FZD5       | -0.46822604 | -0.29838551 | -1.28295822 | 0.133409345 |
| DCAF8      | -0.32164758 | -0.03471504 | -0.81193308 | 0.192444366 |
| ZNF408     | -0.49968848 | -0.72027103 | -0.32242888 | -0.07612802 |
| ALG3       | -0.41543287 | -0.4340948  | 0.818493756 | 0.398376264 |
| WIZ        | -0.33396361 | -0.30560844 | 0.856788842 | -0.23451272 |
| BAIAP2L1   | -0.09247763 | -0.03703269 | -0.45185583 | 0.443900572 |
| CTIF       | -0.31886855 | -0.19729717 | -0.10546325 | -0.29912066 |
| MACROD1    | -0.7854302  | -1.11026378 | 0.950866082 | -0.51985207 |
| WWC2-AS2   | -0.05574677 | -0.57817769 | 0           | 0           |
| COASY      | -0.5411099  | -0.5848204  | 0.397533909 | 0.265896299 |
| GLTPD2     | -0.47183007 | -0.78575977 | 0.804039103 | -0.15133196 |
| SEPHS2     | -0.26447989 | -0.58755185 | -0.64046221 | 0.533498829 |
| CES2       | -0.43653655 | -0.50376579 | -3.02479034 | -0.60767138 |
| FAM96B     | -0.31426783 | -0.62071107 | 1.748421798 | 0.158723233 |
| SDC1       | -0.53089136 | -0.28312604 | -0.2544415  | 0.603311406 |
| ZBTB39     | -0.42725195 | -0.18017481 | -0.62421237 | -0.11712664 |
| HDAC4      | -0.01889815 | -0.04123695 | -0.09490809 | -0.1481363  |
| SLC23A3    | -0.4694491  | -0.34189188 | -0.64212112 | 0.521596107 |
| XBP1       | -0.21203888 | -0.64338239 | 0.575668713 | -0.09628895 |
| C1orf220   | -0.51605862 | -0.07522294 | 0           | 0           |
| AP000253.1 | -0.45762267 | -0.95598159 | 0           | 0           |
| SLC35A3    | -0.13580919 | -0.29729484 | -2.03714678 | 0.09646653  |

Table S7

|             |             |             |             |             |
|-------------|-------------|-------------|-------------|-------------|
| PPP1R26     | -0.33959534 | -0.15350603 | 1.867033291 | -0.93316473 |
| PCTP        | -0.47305587 | -0.58680456 | -0.60041708 | 0.55851191  |
| RPS29       | -0.50746231 | -0.74876292 | 0           | 0           |
| LTB4R2      | -0.78529867 | -0.19171203 | 0.116970461 | 0.594943542 |
| LTB4R       | -0.14117993 | -0.51105234 | 0           | 0           |
| KIAA2013    | -0.33611305 | -0.71935041 | 1.363790292 | 0.077853852 |
| SOD1        | -0.38188811 | -1.13750954 | 0.363832432 | 0.178446093 |
| NFYC        | -0.40322663 | -0.2823925  | 0.545109758 | 0.312579431 |
| DDI2        | -0.26501855 | -0.10414184 | 0           | 0           |
| PLA2G12B    | -0.33609868 | -0.24967584 | 1.111064838 | 0.624652573 |
| GSDMD       | -0.26566136 | -0.71032433 | 0.660077411 | -0.04766632 |
| C2          | -0.43010503 | -0.74550567 | 0.432755131 | -0.18939178 |
| ENKD1       | -0.4336344  | -0.69920602 | 3.913006996 | -0.4355545  |
| SUN2        | -0.3193     | -0.70151874 | 0.449312393 | 0.11986572  |
| NUDT7       | -0.67299883 | -0.06053779 | -1.66038345 | -0.28085022 |
| CDON        | -0.17417905 | -0.25131599 | -0.59650874 | -0.70911766 |
| PEX11G      | -0.75326014 | -0.85260055 | 0.351297575 | 0.366963097 |
| UPB1        | -0.31730085 | -0.93689637 | -0.84848305 | 0.529723698 |
| COBL        | -0.46058831 | -0.4283517  | -0.57320445 | 0.317947739 |
| CTNNBIP1    | -0.32431987 | -0.41035633 | -0.08644239 | 0.211893202 |
| FAHD2A      | -0.55735417 | -0.75915869 | -0.07411674 | 0.037561222 |
| RAB40B      | -0.29192022 | -0.29506683 | -0.58228968 | 0.049223473 |
| NAPA        | -0.08430694 | -0.44407586 | 0.978808587 | 0.235181051 |
| ATP11C      | -0.39617246 | -0.4962611  | -2.33750693 | 0.581151161 |
| RBL2        | -0.20168548 | -0.16035525 | -1.67846187 | -0.08335519 |
| TPCN1       | -0.21429752 | -0.07522231 | 0.063680785 | -0.02602667 |
| KLHDC2      | -0.27129911 | -0.60014535 | -0.2091631  | 0.170424912 |
| MCEE        | -0.26261042 | -0.91583576 | -0.09097058 | 0.290536007 |
| SLC37A4     | -0.42051263 | -0.64756701 | -0.34627389 | 0.255430989 |
| VAMP8       | -0.04124425 | -0.31469545 | 1.279502272 | 0.128464891 |
| SLC25A44    | -0.07027797 | -0.15946619 | -1.00331614 | 0.208155127 |
| AKAP8       | -0.15221767 | -0.1659523  | -0.7323752  | -0.14186242 |
| ERMARD      | -0.35375068 | -0.2645623  | 0.107259007 | 0.127130949 |
| NELFB       | -0.1932114  | -0.27752446 | 0.317020669 | 0.053328531 |
| GRINA       | -0.28755742 | -0.90864838 | 1.562639821 | -0.06423197 |
| FAM35A      | -0.10296709 | -0.1014984  | -1.73588231 | 0.034967798 |
| RPL41       | -0.23737562 | -0.80139547 | 0           | 0           |
| ZNF490      | -0.23522866 | -0.31706731 | 0           | 0           |
| RP4-605O3.4 | -0.28502358 | -0.35084467 | 0           | 0           |
| COX14       | -0.34821437 | -0.63087117 | 2.16322072  | -0.05392273 |
| PMF1        | -0.39775619 | -0.80458549 | 1.50353479  | 0.109678308 |
| DNAJC25     | -0.25762024 | -0.64147023 | 0           | 0           |
| MTMR4       | -0.40478159 | -0.43779279 | -1.41357181 | 0.330107149 |
| CRTC2       | -0.16805163 | -0.39075913 | 0.051774547 | -0.00676647 |
| MCCC2       | -0.15512234 | -0.33812014 | -0.8914384  | 0.241907332 |
| ZNF787      | -0.21183223 | -0.73290527 | 1.228093476 | -0.10028135 |
| NPRL3       | -0.63905097 | -0.4240141  | 0.493287577 | 0.10583806  |
| RAB11FIP3   | -0.4018239  | -0.53544997 | 0.134363183 | -0.39642711 |
| PLXNB2      | -0.43701967 | -0.104864   | 0.169916995 | 0.020986365 |

Table S7

|              |             |             |             |             |
|--------------|-------------|-------------|-------------|-------------|
| RP11-1055B8  | -0.79697501 | -0.3707819  | 0           | 0           |
| TPRN         | -0.56487501 | -1.21245671 | 1.298624537 | 0.354716137 |
| DBI          | -0.36681827 | -0.86292699 | -0.33356865 | 1.295276307 |
| ABCB6        | -0.05404276 | -0.63321618 | -0.76201542 | 0.426527352 |
| COG8         | -0.47126734 | -0.54624387 | 0.3170646   | 0.290269657 |
| SLC27A3      | -0.23002387 | -0.04362002 | 0.96503747  | -0.65199983 |
| RP11-1275H2  | -0.58323387 | -0.57930325 | 0           | 0           |
| RP11-1275H2  | -1.30938908 | -0.76438517 | 0           | 0           |
| ZNF689       | -0.28699723 | -0.29221572 | 1.031655722 | -0.2637842  |
| ATXN2        | -0.21240771 | -0.1043643  | -0.42453146 | 0.233044846 |
| OGG1         | -0.55956259 | -0.3955881  | 0.718960288 | 0.012625895 |
| ILK          | 0.206537515 | 1.201757253 | 0.436354179 | 0.207250583 |
| HIPK1        | 0.608514521 | 0.598429762 | -1.70879186 | 0.142904565 |
| AFTPH        | 0.225512052 | 0.127688809 | -1.19302899 | 0.306962105 |
| EZR          | 0.635199639 | 0.532232931 | 2.028382895 | -0.6115459  |
| ATM          | 0.237124483 | 0.464619915 | -3.38541735 | -0.22074257 |
| PLEKHA2      | 0.448332168 | 0.280240901 | 1.177939345 | -0.64294528 |
| DCHS1        | 0.248940223 | 0.605862334 | 1.23623779  | -0.76766523 |
| C15orf39     | 0.418756075 | 0.436175395 | 1.231489753 | 0.079799598 |
| GAL3ST4      | 0.815096334 | 1.264082083 | 0           | 0           |
| CASP8        | 0.066829063 | 0.562317383 | -0.08585659 | -0.02735524 |
| GGPS1        | 0.285717789 | 0.040890424 | -0.86009204 | 0.139414804 |
| PPARD        | 0.341979948 | 0.075758607 | 1.504500218 | -0.44063782 |
| PRPF38B      | 0.299852852 | 0.464761892 | 0           | 0           |
| HIVEP2       | 0.796412706 | 0.539580281 | -1.21454012 | -0.14966072 |
| DENND3       | 0.196939408 | 0.702035323 | 0.321808537 | -0.09956001 |
| ADD3         | 0.364048863 | 0.724203041 | -0.75229993 | -0.46783887 |
| RP11-356I2.4 | 0.361744004 | 0.533498229 | 0           | 0           |
| CTC1         | 0.052220014 | 0.106348505 | 0.236746275 | -0.26250088 |
| CREB1        | 0.312147403 | 0.467092783 | -1.3697563  | -0.0306265  |
| SSH2         | 0.767238974 | 0.605257178 | -1.11078348 | -0.1479106  |
| MAP3K1       | 0.194611611 | 0.915780821 | 0.342839132 | -0.11606534 |
| CACUL1       | 0.39138009  | 0.10271989  | -1.21912021 | 0.381475018 |
| FGD6         | 0.3402925   | 0.971665334 | -1.82888659 | 0.164066359 |
| OSTM1        | 0.461152636 | 0.223340488 | -0.16681523 | 0.306230349 |
| NABP1        | 0.956656265 | 0.572596089 | -1.61621439 | -0.05247658 |
| SLC43A2      | 0.407430889 | 1.030523542 | 0.998570294 | -0.70507246 |
| TUBA1C       | 0.661210525 | 0.014375581 | 0.563451754 | 0.58945892  |
| GNA13        | 1.473953056 | 0.631577646 | -1.0442863  | 0.075202703 |
| SPAG4        | 1.395309509 | 0.10267052  | -0.3150625  | 0.250123431 |
| PARP8        | 0.61367357  | 1.048613009 | 1.382465005 | -0.76162867 |
| SYT11        | 0.83927617  | 1.560295782 | 1.104662812 | -0.47030767 |
| GON4L        | 0.083443573 | 0.395870578 | 0.299010499 | -0.13533833 |
| RAB34        | 0.427329739 | 0.911291178 | 2.628323027 | -0.45621876 |
| ARL4A        | 0.911524432 | 0.249326538 | -0.54839646 | 0.524243183 |
| LEPROTL1     | 0.346607162 | 0.189425133 | 0.72080405  | 0.331830228 |
| YWHAH        | 0.582616201 | 0.382638921 | 0.443008959 | 0.076907117 |
| HIVEP3       | 0.502124412 | 0.677390703 | 1.605859802 | -0.4707147  |
| CHMP4A       | 0.171802755 | 0.489004797 | 0           | 0           |

Table S7

|             |             |             |             |             |
|-------------|-------------|-------------|-------------|-------------|
| ARPC5       | 0.364655785 | 0.329816316 | 0.021409834 | 0.270991346 |
| ANXA11      | 0.179475818 | 0.112298631 | -0.07918532 | -0.48337686 |
| OGFRL1      | 0.840871555 | 0.963523528 | -0.68599493 | 0.295304456 |
| KLHL5       | 0.129158133 | 0.584080577 | -1.2097025  | 0.293694266 |
| IGF1R       | 0.099475142 | 0.587981055 | 0.336058707 | -0.3151635  |
| COL4A2      | 0.949534604 | 1.655889997 | 2.117296616 | -0.78030922 |
| PAK1        | 0.281390504 | 0.475278109 | 1.604974868 | -0.36879235 |
| JUN         | 2.076863653 | 0.727721182 | 1.248507507 | -0.23296058 |
| MTMR11      | 0.536280589 | 1.568547773 | 2.825428275 | 0.444435764 |
| LINC00857   | 0.25505238  | 0.39503956  | 0           | 0           |
| PDCD4       | 0.36606973  | 0.457650007 | -0.80485571 | 0.594928247 |
| ANKRD53     | 0.56454276  | 0.050439851 | 0           | 0           |
| FHL3        | 0.45196514  | 0.611754846 | 2.16938254  | -0.08237766 |
| CD63        | 0.183209949 | 0.000898267 | 4.441226598 | -0.40185801 |
| F2R         | 0.606628883 | 0.771263767 | -0.17389753 | -0.2972033  |
| MAP3K8      | 0.767646941 | 0.504899957 | 0.508722191 | -0.43997095 |
| SERPINB9    | 1.531728388 | 1.322074766 | 0           | 0           |
| PRDM2       | 0.314824473 | 0.464742445 | -1.82957587 | -0.15102146 |
| PRKCH       | 0.323655375 | 0.736827047 | 0.499690839 | -0.2460966  |
| IFFO2       | 0.261615038 | 0.449662005 | -0.52996997 | 0.09255635  |
| ZNF160      | 0.37977823  | 0.580422404 | -1.63356111 | 0.106533377 |
| ZNF397      | 0.06935928  | 0.176886788 | -1.43506273 | 0.16608209  |
| TCP11L2     | 0.321910921 | 1.110552485 | -1.30203117 | -0.01252704 |
| ACER2       | 0.69550955  | 0.828428896 | -0.57286892 | -0.11771161 |
| U73166.2    | 0.21879076  | 0.014992553 | 0           | 0           |
| GPRIN3      | 1.082847897 | 2.629476209 | -2.90429849 | -0.05316115 |
| SERAC1      | 0.139840604 | 0.330493919 | -2.2821618  | 0.29049065  |
| RNF145      | 0.983648317 | 0.541160459 | 0.096995695 | -0.1488882  |
| SH3RF3      | 1.113262618 | 0.720688176 | 1.303332116 | -0.75168924 |
| CTD-2201E18 | 0.688262684 | 0.759214913 | 0           | 0           |
| SMURF2      | 0.463552708 | 0.812102288 | -1.36878517 | 0.052704733 |
| CD47        | 0.262619463 | 0.476593844 | -0.10113117 | 0.108023851 |
| MKL1        | 0.228638751 | 0.156274647 | 1.651767734 | -0.39168785 |
| MAPRE1      | 1.178227956 | 0.497017683 | -0.53487108 | 0.062129259 |
| BCL2        | 1.403259237 | 1.94661952  | 0.860738927 | -0.83633655 |
| ARHGEF2     | 0.208814974 | 0.798301994 | 2.320199573 | 0.115406888 |
| TSPYL1      | 0.138392978 | 0.017065875 | -0.62382894 | 0.182604383 |
| RALGDS      | 0.756280908 | 0.739960894 | 2.654461212 | -0.97076562 |
| USP37       | 0.015454371 | 0.634064541 | -1.19727115 | -0.08813498 |
| GNA12       | 0.543453086 | 0.206836723 | 0.828546391 | 0.140181826 |
| RUNX2       | 0.920351095 | 1.668513628 | 2.100639086 | -0.81779902 |
| IQGAP1      | 0.966330993 | 1.193505327 | 1.304045854 | -0.52060338 |
| CDC42EP3    | 1.682714538 | 1.079808024 | 0.70670548  | -0.78692398 |
| CCNG2       | 0.663122687 | 0.736043337 | -0.91962554 | 0.38346864  |
| PAFAH1B2    | 0.399952815 | 0.30824201  | -0.55841233 | 0.141036976 |
| DUSP5       | 1.500859474 | 0.332755313 | 1.936628499 | 0.236562128 |
| RNF24       | 0.935015457 | 0.330786608 | -0.21561562 | -0.01705827 |
| PLA2G4C     | 0.987351591 | 1.075158185 | -0.55864009 | -0.05501696 |
| ITGA6       | 0.596316294 | 1.114795722 | 0.223493844 | -0.83318171 |

Table S7

|             |             |             |             |             |
|-------------|-------------|-------------|-------------|-------------|
| SLC12A2     | 0.708437742 | 2.003922483 | -2.03452133 | 0.039157498 |
| GYPC        | 0.597607207 | 0.542287422 | -0.52403675 | -0.14526462 |
| IL2RA       | 2.81534655  | 1.91487976  | 0.470495552 | -1.51807042 |
| SLC25A12    | 0.587594598 | 0.576291574 | -0.43427512 | 0.061056267 |
| ZNF304      | 0.05379419  | 0.337194066 | -0.6359834  | 0           |
| RAP2B       | 0.554509402 | 0.498228878 | 1.658933149 | -0.33432057 |
| FAM129B     | 0.71840143  | 0.620395401 | 3.555077308 | -0.55457236 |
| CAPN2       | 0.659004121 | 1.330769891 | -0.17401557 | -0.04431659 |
| AAGAB       | 0.205323825 | 0.213661318 | -0.57143974 | 0.19697328  |
| KIAA1462    | 0.422202106 | 1.004981734 | -1.06219106 | -0.02194165 |
| SNN         | 0.528547672 | 0.500760771 | 1.365190122 | -0.74422449 |
| CTB-55O6.12 | 0.139965007 | 0.139916973 | 0           | 0           |
| MDFIC       | 0.636515806 | 0.692793996 | -0.12627961 | -0.18556486 |
| IGFBP7      | 1.078827591 | 1.251169111 | 2.728737479 | -0.78851611 |
| PLCD3       | 0.067027123 | 0.470338647 | 3.821416425 | -0.88410289 |
| NOD2        | 0.911273438 | 1.367628708 | 1.260860138 | -0.88104863 |
| STK17A      | 0.72278218  | 0.676509609 | 0           | 0           |
| POU6F1      | 0.614432567 | 0.117209232 | 0.384839493 | -0.41526219 |
| CEP135      | 0.526709831 | 0.913939122 | -1.5874105  | -0.33249279 |
| ZNF829      | 0.023250074 | 0.045574395 | 0           | 0           |
| AEN         | 0.932751548 | 0.423523714 | 0.600401422 | -0.14908657 |
| ZNF568      | 0.147809386 | 0.337194232 | 0           | 0           |
| TTC16       | 1.020712013 | 1.042963353 | 2.523698431 | 0.107957159 |
| IDS         | 0.152184745 | 0.006205825 | -1.20937011 | -0.3059826  |
| HSPG2       | 0.246382264 | 0.836956386 | 1.714460849 | -0.43016857 |
| ATP2B4      | 0.699651171 | 0.734856912 | -1.0003289  | -0.81737477 |
| HELB        | 0.623149979 | 0.519530061 | -0.73570561 | -0.04777633 |
| FAM49B      | 0.547997024 | 0.509490864 | 0.140131187 | -0.04445407 |
| AGO2        | 0.487702471 | 0.28633366  | -1.33975489 | -0.23584519 |
| SYNGAP1     | 0.268507973 | 0.823047257 | 1.064851012 | -0.69579643 |
| CDC42SE2    | 0.390315545 | 0.634701101 | 0.191730859 | -0.17016097 |
| LY6G5C      | 0.234929555 | 0.206509865 | 0           | 0           |
| SP110       | 0.399582598 | 0.691173088 | 0           | 0           |
| REL         | 1.411256594 | 0.592448734 | -1.57559219 | -0.05133732 |
| FAM228B     | 0.283192301 | 0.312260494 | -1.89675589 | -0.0893307  |
| LUZP1       | 0.831026779 | 0.792602908 | -0.98886072 | -0.19791398 |
| CD58        | 0.748250554 | 0.699172615 | 0           | 0           |
| TULP3       | 0.277866305 | 0.033356845 | 1.619545484 | -0.32243427 |
| JAG1        | 0.758433303 | 1.642566738 | 0.573733483 | -0.450034   |
| ZNF292      | 0.119269016 | 0.415800702 | -1.63689976 | 0.088006582 |
| CTTNBP2NL   | 1.204072137 | 1.093322841 | 0.415386748 | -0.72277516 |
| CCNJ        | 0.38330228  | 1.305167804 | -0.62480268 | 0.117720178 |
| CCDC28B     | 0.659070954 | 0.216803997 | 1.12646454  | 0.341068349 |
| ZNF512      | 0.354417507 | 0.003177421 | -0.15431239 | 0.003009443 |
| BBS7        | 0.383074298 | 0.372274546 | -0.69479712 | -0.83705231 |
| HSPA12A     | 0.128109152 | 0.963325431 | -0.32785221 | -0.95731322 |
| PRICKLE2    | 0.90513494  | 0.26331356  | -0.15578203 | -0.35777463 |
| RAVER2      | 0.486696588 | 1.286625087 | -0.1543357  | -0.83942255 |
| GRIN2D      | 0.768362798 | 1.310668955 | 1.733286071 | -1.6512331  |

Table S7

|             |             |             |             |             |
|-------------|-------------|-------------|-------------|-------------|
| EGLN3       | 0.206836354 | 1.330084093 | -0.82836096 | -0.31445728 |
| ZNF614      | 0.418052577 | 0.156702709 | 0           | 0           |
| TIMP2       | 0.909903874 | 0.559287598 | 1.269653541 | -0.61477118 |
| MXD1        | 1.675778292 | 0.413613145 | -0.39580705 | -0.0258206  |
| PKDCC       | 0.661852606 | 0.544838416 | 1.403250116 | 0.264751713 |
| SFMBT2      | 0.945481097 | 1.730031501 | -2.34073519 | 0.7275077   |
| PLP2        | 1.081740065 | 1.031569486 | 1.164607375 | 0.880094294 |
| DYRK2       | 0.261720118 | 0.689616989 | -1.62140998 | 0.286155661 |
| LOXL3       | 0.171722892 | 0.526657517 | 1.835930953 | -0.73837213 |
| DOK1        | 0.306624605 | 0.640044029 | 3.166640856 | -0.7544107  |
| TMSB10      | 0.372313393 | 0.650810766 | 2.606822291 | -0.1002198  |
| EVA1C       | 0.478389682 | 0.672772669 | 1.770788297 | -0.50846722 |
| SYNJ2       | 0.019676423 | 0.496840773 | 0.415285729 | -0.60995602 |
| DNAJC10     | 0.445264531 | 0.431203575 | 0.095319227 | 0.225849793 |
| FZD3        | 0.477063719 | 0.94600639  | 0.643497932 | -0.17730271 |
| KIRREL      | 0.931828215 | 1.526480392 | 0.90575049  | -0.75409726 |
| RPS6KA3     | 0.081673253 | 0.417765793 | -1.1364768  | -0.40370396 |
| ZNF347      | 0.368012665 | 0.461258233 | 0           | 0           |
| HSPBAP1     | 0.330192723 | 0.230193624 | 1.042817147 | 0.067397568 |
| TP53I3      | 1.283631646 | 0.488998972 | 0           | 0           |
| ANKRD44     | 0.535878988 | 1.622782005 | -0.73848869 | -0.55416775 |
| STK4        | 0.547495983 | 0.660382073 | -1.01817653 | -0.15496929 |
| PHACTR2     | 0.407162469 | 0.466857225 | -0.42918927 | -0.58648226 |
| RP1-111C20. | 0.218470594 | 0.46857668  | 0           | 0           |
| HMGNA4      | 0.893883423 | 0.850347065 | 0.902852231 | 0.50227544  |
| ZNF548      | 0.311922546 | 0.43044118  | -0.6359834  | 0           |
| ETS1        | 0.600479875 | 0.918438111 | -0.69907738 | -0.41721392 |
| PDE7A       | 0.28444456  | 1.472260107 | -0.94086287 | -0.02458127 |
| C1QTNF1     | 0.898957532 | 0.055703791 | 0.652007037 | -0.63396413 |
| NF1         | 0.173341151 | 0.280247847 | -1.50233995 | -0.00101841 |
| PMP22       | 0.870698159 | 1.052001521 | 1.193549305 | -0.32730645 |
| TAGLN2      | 0.843099215 | 0.316643094 | 3.053456063 | -0.3917972  |
| ANTXR1      | 1.403257262 | 1.859461691 | 0.288634082 | -1.13113586 |
| NXPE3       | 0.825774433 | 1.189796667 | 0.215499044 | 0.018688768 |
| UBASH3B     | 1.068913685 | 1.45447119  | 0.994932828 | -0.4612511  |
| SLC41A1     | 0.989207331 | 0.123770004 | 0.340815739 | -0.49076626 |
| TMEM217     | 0.6143299   | 1.925494015 | 2.358469277 | -1.95454533 |
| PPP1R12B    | 0.572489447 | 0.526730179 | -1.33123912 | -0.77262325 |
| PAG1        | 1.190876372 | 1.183985849 | -1.37902933 | -0.20184141 |
| LINC00092   | 0.4940757   | 0.691000219 | 0           | 0           |
| ANKRD36C    | 0.174920826 | 1.494585785 | 0           | 0           |
| SLC6A9      | 1.672948589 | 0.702794983 | 0.599377839 | -0.16693639 |
| QSOX1       | 0.74741397  | 0.534409306 | 0.08436965  | 0.873982144 |
| HMGCR       | 0.308296819 | 0.202054391 | -1.9888148  | 0.970707689 |
| PAPOLG      | 0.875223088 | 0.474366874 | -1.62396509 | -0.40858646 |
| MPP3        | 0.349176453 | 0.642146348 | -0.09847681 | -0.74127803 |
| AMIGO2      | 0.748732972 | 0.704360986 | -0.05899657 | -0.17105518 |
| PDE4B       | 1.457745945 | 1.574195476 | -1.66304196 | -0.04775133 |
| TMEM185B    | 0.825788598 | 0.739674506 | 0.051828354 | -0.27522161 |

Table S7

|           |             |             |             |             |
|-----------|-------------|-------------|-------------|-------------|
| ALOX5     | 0.383006739 | 0.906504572 | 1.592957024 | -2.60868989 |
| PRKX      | 0.957081926 | 1.296867129 | -0.40709374 | -0.40434914 |
| C10orf128 | 0.236208242 | 0.391991036 | 1.873775998 | -0.59475118 |
| DDHD1     | 0.534532697 | 0.983351652 | -0.65439676 | -0.40930038 |
| RFX5      | 0.420737351 | 1.080513914 | -0.37841457 | -0.17802702 |
| PAM       | 0.843895405 | 0.600190161 | 0.231157961 | -0.61032978 |
| ARMC2     | 0.591703857 | 0.466729815 | 2.625052766 | -1.65408982 |
| EMP3      | 0.682402112 | 0.567126126 | 3.861439102 | -0.51010362 |
| PRTFDC1   | 0.727373326 | 0.467318284 | 0           | 0           |
| NFKBIE    | 0.760389346 | 0.837856501 | 2.648804542 | -0.54488938 |
| KIAA0556  | 0.064353905 | 1.018507738 | -0.61579524 | -0.06799827 |
| WIPF1     | 0.796000038 | 1.563411664 | 0.582035911 | -0.62289764 |
| UBE2Q2    | 0.760722559 | 1.235568477 | 0           | 1.262570035 |
| DNM3      | 0.062197319 | 1.366634502 | -0.71764811 | -1.65639594 |
| PACS1     | 0.715308983 | 0.906465558 | 1.263012013 | -0.69419383 |
| STARD3NL  | 0.393289207 | 0.317013568 | 0.284379543 | 0.089340831 |
| ABR       | 0.73744398  | 0.957952915 | 1.633512556 | -0.81375026 |
| MAFK      | 1.575205563 | 0.547531423 | 0.754702647 | -0.17496302 |
| EML2      | 0.283485161 | 0.190616503 | 1.521087122 | -0.56349831 |
| HECA      | 0.753868875 | 0.454805838 | -1.51568505 | 0.21893614  |
| FHOD1     | 0.292893102 | 0.515954235 | 1.710989336 | -0.8840062  |
| ZNF611    | 0.372163916 | 0.850663381 | 0           | 0           |
| FAM188B   | 0.753743353 | 1.046385899 | 0.911010226 | -0.18264424 |
| FKBP10    | 0.525846356 | 0.593156677 | 2.932066341 | -0.72629667 |
| CEP85L    | 0.928824297 | 0.715739029 | -2.93536808 | -0.06865869 |
| CAV2      | 0.684934604 | 0.158278096 | 0.365745293 | -0.1864565  |
| PRDM1     | 1.677332499 | 1.928333174 | 1.180114888 | -0.56235547 |
| TMEM184B  | 0.488429026 | 0.255788514 | 0.863103139 | -0.01009032 |
| IER5      | 1.342771209 | 0.812188076 | 2.234654083 | 0.257027684 |
| GPRASP1   | 0.117266682 | 0.256034208 | -0.59171416 | -0.66554115 |
| ANK1      | 1.180982334 | 0.878032443 | -4.43893353 | 1.362589109 |
| GAS8      | 0.206786375 | 0.120593873 | 1.904581155 | -0.099063   |
| HIST1H4H  | 2.537506019 | 1.491112869 | 0           | 0           |
| PIP4K2A   | 0.614293283 | 0.692749292 | 0.799184888 | -0.5885223  |
| FAM57A    | 0.745939254 | 0.251528048 | -0.18712292 | 0.217869398 |
| ARF3      | 0.10134261  | 0.283156688 | -0.31041483 | 0.005606564 |
| STXBP1    | 0.928345341 | 0.81656919  | 0.70524409  | -0.63452383 |
| SYTL3     | 0.914614101 | 1.2764173   | 3.366657791 | -0.69187179 |
| SCLT1     | 0.587978914 | 1.009908079 | -0.90745223 | 0.046252965 |
| TPM2      | 0.392759858 | 0.568615062 | -2.70140397 | -0.93933016 |
| ARRDC4    | 1.13193647  | 1.053753981 | -0.74628053 | -0.1665651  |
| RUNX1     | 0.834956904 | 1.154318776 | 1.861713869 | -1.10516458 |
| LHFPL2    | 1.382728066 | 0.907107227 | 1.420720621 | -0.91480908 |
| CUEDC1    | 0.152164759 | 0.150517502 | 1.519803944 | -0.85833417 |
| SEL1L3    | 0.980156512 | 2.139884142 | -0.04079911 | -0.0592296  |
| ZC3HAV1L  | 0.749544194 | 1.505007104 | -0.02992562 | -0.57589791 |
| DACT1     | 1.390663693 | 1.103494963 | 0.330243162 | 0.321222378 |
| ANK3      | 1.308800262 | 1.028029703 | -1.40052195 | 0.162691336 |
| BIRC3     | 2.631675691 | 1.913215965 | -0.46519799 | -0.32329277 |

Table S7

|            |             |             |             |             |
|------------|-------------|-------------|-------------|-------------|
| APH1B      | 0.757270952 | 0.924328887 | 0.375953389 | -0.51268237 |
| PDE4D      | 1.396158169 | 1.717939224 | -1.7735355  | -0.23205109 |
| CMTM7      | 0.835509635 | 0.726521584 | 2.974797235 | -0.38323212 |
| TYROBP     | 0.322367241 | 0.239741423 | 3.835617088 | -0.55002251 |
| GLIPR2     | 1.098202965 | 1.491678529 | 2.059322545 | -0.49137439 |
| IKZF2      | 0.667169327 | 1.029833663 | -0.0474579  | -0.91084651 |
| CACNB3     | 0.765884206 | 0.886438471 | 4.039799951 | -0.96824215 |
| ARHGAP27   | 0.094224145 | 0.913963653 | 2.637517657 | -0.83262236 |
| MMP25      | 1.090406135 | 0.699040384 | 4.483764495 | -3.17770423 |
| ABCC4      | 0.66911247  | 1.899637015 | 1.163017923 | -1.04546758 |
| PPP1R2     | 0.378987921 | 0.458641792 | -0.75542122 | 0.11968184  |
| PHLDB1     | 0.91313018  | 1.109551319 | 2.46334694  | -0.89030905 |
| MEF2C      | 0.807088734 | 0.713868554 | -1.80717907 | -0.82807915 |
| CEP97      | 0.071776566 | 0.700353279 | -0.52654935 | -0.60078298 |
| ITPKB      | 0.86832817  | 0.967113163 | 0.071314042 | -0.65280104 |
| METRNL     | 2.230292008 | 0.437100254 | 2.751828171 | -0.12813503 |
| COL4A1     | 1.139606821 | 2.086432549 | 2.352602131 | -0.74598759 |
| DBN1       | 0.583408718 | 1.260038911 | 2.528306222 | -0.57452628 |
| TNFAIP8    | 0.80950373  | 1.416672306 | 1.469301288 | -0.71688848 |
| CHST15     | 0.581251601 | 0.220662511 | 0.107601561 | -0.76183054 |
| HID1       | 0.270092333 | 0.360719241 | 2.477642255 | -0.24166544 |
| FBLIM1     | 0.805131856 | 1.02393784  | 3.379962805 | -1.16794401 |
| PCSK5      | 0.8676775   | 2.207672279 | -1.02756356 | 0.159087952 |
| ARRDC2     | 0.835739361 | 0.967291283 | -0.78758251 | -0.0113365  |
| MFSDF      | 0.016164464 | 1.271478437 | 0.899072037 | -0.5909925  |
| SMARCD3    | 0.6025623   | 0.614796113 | 1.491249279 | -0.67714389 |
| MMP14      | 0.694237036 | 1.202494422 | 1.594138284 | -0.34194033 |
| STK32C     | 0.217694011 | 0.166292154 | 1.489865161 | -0.37662975 |
| BARD1      | 0.710503171 | 1.35899544  | -0.54943426 | 0.036576495 |
| ARHGEF19   | 0.116289359 | 0.965282245 | 1.352125225 | 0.132853356 |
| RP11-344B5 | 0.317344241 | 1.65690241  | 0           | 0           |
| GATA2      | 0.536555439 | 1.411964983 | 0.913595951 | -1.02291639 |
| FAM102B    | 1.559605239 | 1.304768032 | -0.18707021 | -0.71066317 |
| PHF20      | 0.304034155 | 0.109638475 | -0.52753271 | -0.02849471 |
| FOS        | 2.544570253 | 1.415206078 | 0.901815948 | -1.27625062 |
| PLAGL1     | 0.542383863 | 1.360918788 | -0.57816537 | -0.53092523 |
| ADAMTS10   | 0.350678127 | 0.541581164 | 2.188299531 | -0.98656446 |
| VCL        | 1.302444459 | 0.563230935 | -0.53223755 | -0.1245551  |
| NFKB2      | 0.766560932 | 0.734532337 | 2.89418607  | -0.50869292 |
| ZNF267     | 1.061632623 | 0.805323077 | 0           | 0           |
| ZNF737     | 0.115025985 | 0.619777573 | 0           | 0           |
| ARHGDIB    | 0.546290008 | 0.626562866 | 2.225127768 | -0.51098709 |
| ZNF85      | 0.604002773 | 0.909345885 | -0.99603891 | -1.89250763 |
| GEM        | 4.402705436 | 2.33967787  | 0.540725165 | -0.66390121 |
| SH3YL1     | 0.372728776 | 1.126780071 | 0.525679127 | 0.012266836 |
| TP53BP1    | 0.314955412 | 0.272920723 | -0.77989731 | -0.10843209 |
| CHST3      | 1.125070617 | 1.027366091 | 0.321198056 | -1.07153824 |
| MEF2C-AS1  | 0.670081813 | 0.730051529 | 0           | 0           |
| BTN2A3P    | 0.333528244 | 0.966300008 | 0           | 0           |

Table S7

|             |             |             |             |             |
|-------------|-------------|-------------|-------------|-------------|
| RP11-10K16. | 0.75617687  | 0.118980429 | 0           | 0           |
| GALNT7      | 0.664368287 | 1.057901359 | -0.67679338 | -0.48307283 |
| PPP1R15A    | 2.924249925 | 0.177607944 | 0.76945589  | -0.0954569  |
| CASP1       | 0.597696417 | 0.866676026 | 2.383475713 | -0.39463695 |
| FAM131A     | 0.660102934 | 0.57597343  | 1.657408356 | -0.25165279 |
| CDKN2A      | 1.914366723 | 2.678095551 | 0           | 0           |
| CHST11      | 0.982346625 | 1.399887064 | 2.893751733 | -1.29598236 |
| NEURL3      | 0.168964502 | 1.404380213 | 1.784536983 | -0.79572251 |
| SPINT2      | 0.74060802  | 1.678745583 | 1.413768062 | 0.145905305 |
| RIN1        | 2.031402412 | 0.737316277 | 1.707668716 | -0.32343581 |
| ANKDD1B     | 0.118463033 | 0.733052327 | 0.325794206 | -0.49892583 |
| CDKN1A      | 2.544575016 | 0.629313038 | 1.598416604 | 0.443484885 |
| PAQR8       | 0.160974843 | 1.340885687 | 0.751747403 | -0.98759201 |
| RASGRP3     | 0.493792339 | 0.936983052 | -1.38152273 | -0.72065189 |
| PDE3A       | 0.814381006 | 1.011478896 | -1.15623065 | -0.11699403 |
| PDE5A       | 0.291178998 | 0.747853187 | -0.38215773 | -0.67585866 |
| DNAJB6      | 0.411842905 | 0.129000938 | -0.81697605 | -0.06673627 |
| GIPR        | 0.326947808 | 2.137448582 | 0.902862854 | -1.46071385 |
| NKRF        | 0.182973903 | 0.041582058 | -0.89027656 | 0.075334968 |
| TNFRSF12A   | 4.288482876 | 1.97438627  | 3.016995017 | 0.441741209 |
| B3GNT7      | 0.74913201  | 0.804298229 | 4.292399701 | -1.27906127 |
| SLC1A5      | 1.245378409 | 0.893885615 | 2.19382733  | -0.47847185 |
| NOTCH3      | 0.444863613 | 1.390804959 | 0.484156486 | -0.98959039 |
| HCG11       | 0.423145772 | 1.17627342  | 0           | 0           |
| AC092835.2  | 0.880720102 | 1.094616325 | -0.16808076 | 0.217916282 |
| HDAC7       | 0.123737296 | 0.694856857 | 1.638490515 | -0.68122716 |
| ARL4C       | 1.132742728 | 1.393795419 | 1.753185375 | -0.62537132 |
| RPS6KA1     | 0.449270801 | 0.533967757 | 1.67061533  | -0.10019908 |
| SLC26A2     | 0.864163061 | 1.24209223  | -1.38691013 | -0.1274229  |
| E2F3        | 0.944425236 | 1.639467956 | -1.36365033 | 0.171253725 |
| C10orf54    | 0.735088271 | 0.889918734 | 2.270067259 | -0.46636396 |
| NFKBID      | 1.41753861  | 0.661845381 | 3.109732239 | -0.87171651 |
| HCST        | 0.417895244 | 0.730590703 | 3.790212947 | -0.74377174 |
| ENDOD1      | 0.684598508 | 0.96264205  | 1.288839268 | -0.31403627 |
| IMPDH1      | 0.36778791  | 0.648319509 | 2.202662894 | 0.083004332 |
| ANXA2R      | 0.90046214  | 1.074074395 | 0           | 0           |
| AC025171.1  | 0.75573745  | 1.583295293 | 0           | 0           |
| PEA15       | 0.788437396 | 0.537757854 | 1.381711238 | -0.37316922 |
| TRABD2A     | 0.693559808 | 2.904391707 | 0           | 0           |
| FLVCR1      | 0.457854213 | 0.852841569 | 0.364720603 | -0.01575599 |
| TUBB6       | 1.575784788 | 0.886241196 | 2.789965789 | 0.197080033 |
| CHORDC1     | 0.614424763 | 0.078602923 | -1.04564886 | -0.0021195  |
| CAV1        | 0.548670112 | 0.522922038 | -0.5205675  | -0.23609891 |
| SLC35F2     | 1.257665932 | 2.502554979 | 4.411163496 | -1.22894059 |
| TNFSF8      | 2.070054916 | 1.609547685 | 2.652358969 | -2.00135898 |
| PDP1        | 0.77886305  | 0.916591583 | -0.05579457 | -0.12831322 |
| NRSN2       | 0.475809925 | 1.113606024 | 0           | 0           |
| FAM167A     | 1.516944215 | 2.146495292 | -0.62556102 | -0.76761001 |
| FMNL3       | 0.363029645 | 1.367090221 | 1.817664054 | -0.54381091 |

Table S7

|             |             |             |             |             |
|-------------|-------------|-------------|-------------|-------------|
| PHF19       | 0.627492914 | 0.950010095 | 0.417615209 | 0.275216025 |
| AP3M2       | 0.063473859 | 0.493852445 | 0.729342759 | -0.36671048 |
| MTHFD1L     | 1.363702996 | 0.711104865 | 1.683303879 | -0.71234881 |
| ITPR3       | 0.114410168 | 1.487066059 | 2.104802918 | -0.99517568 |
| SYK         | 0.605778315 | 1.190669322 | 1.516473316 | -0.72147088 |
| ISG20       | 1.657766168 | 1.464649313 | 2.901312549 | -0.06281807 |
| TRIM31      | 6.437374425 | 5.287850788 | -0.6359834  | 0           |
| RARG        | 0.092073388 | 0.40437792  | 2.338909831 | -0.69968445 |
| TMEM51      | 0.893015606 | 1.031575309 | 2.142876895 | 0.571641906 |
| RP11-712B9. | 0.712924443 | 0.892563051 | 0           | 0           |
| PCBP3       | 1.826472041 | 1.156392453 | 2.130684696 | -0.28867433 |
| ARHGAP31    | 0.740964793 | 0.881612164 | -0.39999077 | -0.41793674 |
| INPP4B      | 1.479815522 | 2.312810377 | -1.06085594 | -1.32787338 |
| PRICKLE1    | 0.461204264 | 1.353772618 | -0.46863054 | -0.50959166 |
| SWAP70      | 0.88337884  | 0.928714548 | 0.311192332 | -0.41414676 |
| TMEM173     | 0.637253878 | 0.810634487 | 2.455595683 | -0.74291456 |
| ALOX5AP     | 0.739912335 | 1.440103983 | 2.309307008 | -0.86511554 |
| WNT4        | 1.511036435 | 2.684058697 | 2.880433929 | -1.07091728 |
| C5orf30     | 0.51062975  | 0.215441894 | -0.44383564 | 0.242491803 |
| MARCH3      | 0.820371914 | 1.47102088  | 0.459302618 | 0.143844443 |
| PWWP2B      | 0.110151519 | 0.138021358 | 2.71558828  | -0.15463028 |
| PTPRH       | 0.24812856  | 0.45259034  | 1.427385237 | -1.78066639 |
| TMEM51-AS1  | 1.11105017  | 3.411610875 | 0           | 0           |
| HNRNPA1L2   | 0.075530929 | 0.201172261 | -0.27593841 | -0.02676901 |
| DBNDD1      | 0.571484432 | 0.029530507 | 0.325793703 | 0.496063642 |
| ADAM9       | 0.909533222 | 0.328265364 | -1.656443   | 0.167986372 |
| AP1S3       | 0.894903692 | 0.84644766  | 0.55872329  | 0.239423377 |
| GSTM5       | 0.16131066  | 1.678663858 | 0           | 0           |
| GSN         | 0.776273901 | 1.343147179 | 1.790108994 | -1.37958371 |
| PLAU        | 0.902331187 | 1.544023315 | 1.532734806 | -0.55545575 |
| RAB8B       | 0.948956257 | 0.967612606 | 1.112505116 | -0.5781828  |
| ZNF486      | 0.411365076 | 1.212168844 | 0           | 0           |
| CHD3        | 0.384204597 | 1.12818872  | -0.94316699 | -0.14957562 |
| RP11-848P1. | 0.661668053 | 0.824320022 | 0           | 0           |
| ZNF853      | 0.933110676 | 0.563337128 | 3.274637855 | -1.14606384 |
| DLG3        | 0.754617754 | 1.505494479 | -0.49475932 | 0.124363434 |
| FGFR1       | 1.164473972 | 0.150418908 | -0.09954086 | -0.61591514 |
| STX11       | 1.467106915 | 1.309022039 | 1.562993566 | -0.30459298 |
| ZSWIM4      | 0.422576987 | 0.847800831 | 1.489463798 | -0.17288864 |
| CD83        | 2.036271737 | 1.857477833 | 2.146587689 | -0.70993473 |
| P2RX1       | 0.530039265 | 1.753042378 | 0.721393876 | -2.38295013 |
| SYCP2       | 0.431580398 | 1.42290382  | 0.654845276 | -1.51062994 |
| PHLDA3      | 0.233685638 | 1.067822369 | 2.885358436 | -0.10047677 |
| SLC25A24    | 1.014943926 | 1.397560893 | 1.008158889 | -0.85119962 |
| FAR1        | 0.834100096 | 1.127328459 | 0.014874598 | -0.60422752 |
| ITGA3       | 0.179278654 | 1.648414918 | 1.998615961 | -0.40192461 |
| IL34        | 0.558872565 | 1.430380667 | 2.392586012 | -0.89906008 |
| PPDPF       | 0.185917786 | 0.354074834 | 2.644950416 | 0.888736211 |
| COL16A1     | 1.230550369 | 1.953364954 | 3.147533591 | -1.06447803 |

Table S7

|           |             |             |             |             |
|-----------|-------------|-------------|-------------|-------------|
| FUT4      | 0.821707351 | 1.354324286 | 1.492307062 | -0.76703684 |
| ZDHH1C1   | 0.465113538 | 0.116661806 | 1.824724074 | -0.45239607 |
| TPM4      | 1.293744804 | 0.816103608 | 0           | 0           |
| MCAM      | 0.583721702 | 1.67838955  | 0.509013857 | -0.72677192 |
| STAT4     | 0.22583522  | 0.046659694 | 2.08426467  | -0.00234417 |
| FBLN5     | 2.00226715  | 1.678008132 | 0.801432139 | -0.55402504 |
| HMGA1     | 0.447393266 | 0.597363655 | 2.948144709 | -0.12892211 |
| ZSCAN9    | 0.292797128 | 0.35681754  | 0           | 0           |
| LOXL1     | 1.162401036 | 2.900797783 | 3.802139696 | -1.57688249 |
| ENAH      | 0.745672341 | 0.907743847 | 0.783104514 | -0.78400951 |
| IFI27L2   | 0.423106853 | 0.681411267 | 1.533202571 | -0.00250536 |
| KIF3C     | 0.73940058  | 0.806732959 | 1.297215036 | -0.80402926 |
| EIF5A2    | 1.197231152 | 1.28856486  | 0.887402926 | -1.37460035 |
| F3        | 2.719885438 | 1.794139104 | 0.361036503 | -0.48389335 |
| CD96      | 1.033591163 | 2.369405301 | 1.925544782 | -0.74530226 |
| TRNP1     | 1.487113717 | 1.6259661   | 2.672690882 | -1.33459633 |
| ITM2C     | 0.43071074  | 0.310066972 | 2.163112089 | -0.0327029  |
| CLSTN1    | 0.466093416 | 0.7438714   | 1.703598884 | -0.92813973 |
| MTHFD2    | 2.488153867 | 1.657689536 | 0.779096377 | 1.051908599 |
| LINC00271 | 0.116938349 | 0.797903273 | 0           | 0           |
| AHI1      | 0.186695749 | 0.709417799 | 0.070415281 | -0.02082168 |
| PTGER4    | 1.102214887 | 1.719406865 | 2.446852268 | -0.73081845 |
| SRGN      | 1.94555423  | 0.903459361 | 1.225063965 | -0.63537593 |
| PARP6     | 0.257087956 | 0.486442011 | -0.27798535 | 0.054563408 |
| C1orf116  | 0.115005527 | 2.019386931 | 1.324206149 | -0.31361391 |
| CYS1      | 0.240984479 | 0.862260489 | 1.366771217 | -0.68056231 |
| ZNF816    | 0.403440924 | 0.297700493 | 0           | 0           |
| ATP9A     | 0.30565291  | 0.765239688 | 1.193372374 | -0.08132922 |
| CYTIP     | 1.692821081 | 1.586333658 | 0.869698467 | -1.10493238 |
| C1orf145  | 0.252255038 | 0.317449474 | 0           | 0           |
| COL12A1   | 1.472583907 | 1.412307237 | 0.399665343 | -0.68233481 |
| SESN3     | 0.123344788 | 0.962778584 | -1.78125632 | 0.597231428 |
| ALDH1A3   | 2.379270439 | 0.79034194  | 0.913742086 | -0.74390117 |
| PDLIM4    | 2.602219344 | 2.331891982 | 3.7548611   | -1.20614905 |
| ABCC1     | 0.610701548 | 1.17366118  | 1.153983772 | -0.82595914 |
| ARSJ      | 0.065291442 | 1.545508546 | -3.23379549 | 0.462863467 |
| RELB      | 1.2907592   | 0.988091719 | 3.670434998 | -0.40498094 |
| MYOF      | 1.319585312 | 1.944372547 | 2.131501593 | -0.83328059 |
| GSTP1     | 0.448499146 | 0.76899259  | -0.43718828 | 0.309344499 |
| RHOQ      | 1.23945222  | 0.595583282 | -0.60215307 | -0.07224149 |
| LRP8      | 0.966499428 | 1.450306979 | 2.381450491 | -1.10664815 |
| DAGLA     | 0.293391531 | 1.396812362 | 2.416658589 | -1.3794488  |
| LTBP4     | 0.544332614 | 0.830066455 | 2.541957096 | -1.68978015 |
| BATF3     | 0.154265566 | 0.626364493 | 3.378549605 | -0.57528181 |
| TEAD4     | 0.874407556 | 0.29238412  | 0.121671241 | -0.33819356 |
| TP53111   | 0.257403967 | 0.343924029 | 1.536809332 | -0.32340627 |
| COL1A2    | 0.754841678 | 2.164781518 | 2.358858358 | -0.97687036 |
| RIMKLB    | 0.508568629 | 0.880823723 | -2.93209986 | 1.250216077 |
| RIPK3     | 0.144778024 | 1.348711861 | 1.634976637 | -0.22868949 |

Table S7

|             |             |             |             |             |
|-------------|-------------|-------------|-------------|-------------|
| MYO5A       | 0.88090349  | 1.339619392 | 2.529314193 | -0.8428894  |
| PYGO1       | 1.588974881 | 1.591078679 | 0.434472327 | -1.05426947 |
| ROBO1       | 0.902924141 | 1.300314483 | 1.371327503 | -0.03158651 |
| ZNF529      | 0.56980585  | 0.375264171 | 0           | 0           |
| RAB11FIP5   | 0.350360486 | 0.443221942 | 1.833317975 | -0.39488902 |
| RECK        | 1.077910969 | 0.736919339 | -1.00972631 | -0.53148237 |
| BEX4        | 0.55399773  | 0.631627508 | 2.670853029 | 0.649779099 |
| SFXN3       | 0.446551987 | 0.88182714  | 1.900253123 | -0.48894124 |
| PIWIL4      | 1.135302246 | 1.318427744 | 1.869585983 | -3.65213243 |
| SPECC1      | 1.010442841 | 1.87745928  | 1.08461155  | -0.03887166 |
| PAQR5       | 0.486198319 | 2.654955259 | 1.086330257 | -1.71409442 |
| PLEKHG4     | 0.222400405 | 1.485052639 | -0.34117179 | 1.115836368 |
| PRR7        | 1.046103404 | 1.352966759 | 2.568225127 | -0.80537328 |
| NMNAT2      | 0.475821787 | 2.903483235 | -0.04377253 | -0.95844398 |
| ISYNA1      | 0.131479198 | 0.462270536 | 4.217248829 | 0.130161826 |
| VIM-AS1     | 1.26673182  | 2.246130419 | 0           | 0           |
| LINC00982   | 0.161787673 | 1.347721165 | 0           | 0           |
| GBGT1       | 0.788947025 | 1.004393622 | 0.406581118 | -2.09457555 |
| ZNF667-AS1  | 0.611361088 | 0.093150948 | 0           | 0           |
| ZNF667      | 0.831329929 | 0.527161854 | -1.17321334 | 0.209526061 |
| RAB11FIP1   | 0.210740661 | 0.534048027 | -0.4509305  | -0.03357416 |
| ODF2L       | 0.768170138 | 1.128815423 | -1.29180809 | 0.147834103 |
| NCK2        | 0.573570192 | 0.84340366  | 2.298019257 | -0.95621763 |
| DZIP1L      | 0.131459586 | 1.396415119 | 1.765312152 | -1.05051316 |
| SLC38A1     | 1.194178717 | 1.756399779 | 1.420509663 | -0.48736525 |
| AKR1B1      | 0.448711984 | 0.554663713 | 1.383422272 | 0.315325373 |
| SCRN1       | 0.561662944 | 1.600809421 | -0.14302712 | -0.79150925 |
| HENMT1      | 0.246100636 | 1.438022946 | -0.29123835 | -1.46071385 |
| SLC45A4     | 0.676612313 | 1.684197447 | 0.610797872 | 0.068459871 |
| VIM         | 1.248606631 | 1.25909388  | 2.625892187 | -0.65528303 |
| ZNF506      | 0.486781058 | 0.822776587 | 0           | 0           |
| SLC4A8      | 0.342220083 | 1.502239303 | 0.448000465 | -0.95996991 |
| OSBPL7      | 0.120508775 | 1.269629031 | 2.361698112 | -0.71657746 |
| MLLT3       | 0.382141099 | 1.157209583 | -0.52511602 | 0.239374394 |
| AC144831.1  | 1.289256442 | 0.712319173 | 0           | 0           |
| RP11-353N14 | 3.344352158 | 2.149270413 | 0           | 0           |
| TMEM243     | 0.535027193 | 0.863030143 | -0.34921237 | 0.387248981 |
| PLD4        | 0.06463211  | 0.955610046 | 2.142321583 | -0.6289241  |
| SLC7A6      | 0.641496445 | 1.925818393 | 0.597790617 | -0.22356098 |
| FRAS1       | 0.16173344  | 1.803626996 | -2.25575162 | 0.09478621  |
| XYLT1       | 1.235589516 | 1.484122118 | 1.542580434 | -0.63312086 |
| CHIT1       | 0.068470527 | 1.017529761 | -0.29123835 | -1.46071385 |
| DNAJC6      | 0.757102477 | 1.519228134 | 0.963296715 | -1.17268174 |
| BICD1       | 1.670194456 | 1.961804749 | 1.129419741 | -0.68203497 |
| CYR61       | 4.377563338 | 1.00498692  | -0.45295493 | -0.3162833  |
| ZNF426      | 0.284035697 | 0.919765101 | -0.60165027 | -0.13903798 |
| OBSCN       | 0.665295285 | 0.777743154 | -3.66502983 | -1.46748569 |
| CLCF1       | 2.853108714 | 1.157369215 | 3.382167877 | -0.97853894 |
| S100A11     | 0.814997288 | 0.723766999 | 3.171838688 | -0.02519354 |

Table S7

|              |             |             |             |             |
|--------------|-------------|-------------|-------------|-------------|
| SLC6A6       | 0.760510931 | 2.057664186 | -0.84418516 | -0.15386696 |
| CARD16       | 0.696740887 | 0.81455667  | 2.383475713 | -0.39463695 |
| C7orf31      | 0.275825827 | 0.488958854 | 1.378088589 | -0.18650106 |
| LCA5         | 1.050177308 | 0.590452337 | -0.26283468 | -0.56273538 |
| ZFP82        | 0.160171379 | 0.845641551 | 0.255048654 | -1.08132122 |
| LXN          | 1.137385957 | 2.301072667 | 2.835179114 | -0.83160955 |
| KIAA0226L    | 0.509680934 | 0.815652516 | 0.570546637 | -0.93518473 |
| LBH          | 0.62782349  | 1.713934796 | 1.709378184 | -0.75446398 |
| CD59         | 0.553474297 | 0.35979415  | -1.19359512 | 0.118905718 |
| RP11-44N21.1 | 1.188434716 | 1.559115465 | 0           | 0           |
| BCL11A       | 0.673237032 | 2.618414652 | 0.55417592  | -0.66774834 |
| ATP6V1E2     | 0.285752088 | 0.10412713  | 0.902862854 | -1.46071385 |
| SOD3         | 1.245188234 | 2.273535233 | 1.549942428 | -0.07436255 |
| ABCA7        | 0.361602295 | 0.762929265 | 0.745261284 | -0.17576071 |
| VANGL2       | 0.44526088  | 2.438495206 | 0.790497259 | -0.51274782 |
| MAP2         | 1.027137854 | 0.875621564 | 0.060137225 | -0.46437772 |
| TUBA1A       | 0.82962813  | 1.117559547 | 1.228113367 | -0.56344433 |
| FLRT2        | 0.378208825 | 1.387615327 | 0.701461864 | -0.87640443 |
| IFT57        | 0.737539187 | 0.421426942 | 2.446348619 | -0.64839546 |
| AC006129.2   | 0.349341963 | 1.522858236 | 0           | 0           |
| RP11-1149O2  | 0.534831341 | 0.620070464 | 0           | 0           |
| NFATC4       | 0.713605161 | 0.601873203 | 2.166863716 | -0.66376135 |
| ADRA2A       | 1.273408506 | 3.060089698 | 0.666015681 | 3.285906686 |
| KIAA1549     | 0.312283064 | 0.970973351 | 0           | 0           |
| RAP1GAP2     | 0.264576018 | 0.693516742 | 1.512621202 | -0.53271777 |
| PKM          | 0.794943799 | 1.176288073 | 2.012759109 | -0.24340875 |
| HLA-L        | 0.132959182 | 0.609978823 | 0           | 0           |
| CD44         | 0.797992129 | 1.415315724 | 1.09010886  | -0.60309806 |
| ORAI2        | 0.700030541 | 0.894705466 | 2.002792026 | -0.92901015 |
| STK39        | 0.891199728 | 1.917316889 | 0.551296321 | -0.7849475  |
| PTP4A3       | 0.492512547 | 0.943170371 | 1.442673619 | -0.31569774 |
| RASSF3       | 0.68706604  | 1.833587714 | -0.91983319 | -0.11785679 |
| IGF2BP2      | 0.690209548 | 1.195602354 | 0.562735818 | -0.04531726 |
| TRIM59       | 0.732166128 | 1.117847828 | 1.410463516 | 0.035855137 |
| ARMCX1       | 0.946477404 | 0.452928241 | 0.179527263 | -0.40202973 |
| PDGFA        | 2.141648615 | 1.691178247 | 2.769844299 | -0.51265761 |
| MAML2        | 0.946407038 | 1.553113505 | -0.05034248 | -0.62227034 |
| HOMER1       | 1.952588506 | 2.243048128 | -1.86025411 | 0.412767897 |
| SLC25A36     | 0.630623089 | 1.244212335 | 0.228616798 | -0.66621817 |
| MEX3B        | 2.359522955 | 1.85870158  | 0.321530985 | 0.047775623 |
| KCNAB2       | 0.376904245 | 1.566963031 | 3.589592455 | -1.09644572 |
| RP11-4O1.2   | 0.124349157 | 1.194043104 | 0           | 0           |
| ZNF14        | 0.747461535 | 1.320333857 | 0           | 0           |
| CSGALNACT    | 1.462617263 | 0.404999009 | -0.78611566 | -0.53698503 |
| ZNF43        | 0.506099341 | 1.325024931 | 0           | 0           |
| FAM60A       | 1.18939247  | 1.414514517 | -0.7874178  | -0.92851616 |
| ZDHH13       | 0.456023649 | 1.367726205 | 0.245412153 | -0.03057891 |
| ROR2         | 1.890312753 | 3.227389866 | 1.419303949 | -2.1071005  |
| LRRC8B       | 0.827214083 | 0.358061101 | 0.249549929 | -0.3333449  |

Table S7

|             |             |             |             |             |
|-------------|-------------|-------------|-------------|-------------|
| SNPH        | 0.643769231 | 1.130816412 | 1.837928521 | -2.38686449 |
| LAPTM5      | 0.783487348 | 1.033942237 | 2.795439131 | -0.62692969 |
| PIK3IP1     | 0.818138296 | 1.466382792 | 1.835772082 | -1.10471875 |
| SIK1        | 1.164224078 | 1.932168422 | -0.09352333 | -0.75070959 |
| PDE4A       | 0.65321955  | 1.082828307 | 0.730181686 | -0.34440217 |
| SLC6A8      | 1.874125045 | 1.484960108 | 2.283776948 | -0.07964509 |
| LETM2       | 2.180473039 | 0.60856907  | -0.16037646 | -0.1869306  |
| NLRP1       | 0.428060237 | 1.001367554 | -0.18072493 | -1.16977654 |
| SLFN11      | 1.344033478 | 1.348886125 | 0           | 0           |
| CDC7        | 1.309238988 | 1.297184817 | -0.58165859 | 0.267522639 |
| AFAP1       | 0.899373322 | 1.270404803 | 0.929105836 | -0.79388569 |
| ZC2HC1A     | 1.059594634 | 0.730882247 | 1.059075055 | -0.37043793 |
| FMNL1       | 0.82381319  | 1.34155821  | 2.407171051 | -0.86121845 |
| OSBPL3      | 1.081084526 | 2.142196545 | 2.099112189 | -0.58831423 |
| SLC7A7      | 0.350443123 | 0.76170042  | 2.307026073 | -0.15072281 |
| NFE2L3      | 1.42727801  | 0.716512991 | 2.345572288 | -1.11058798 |
| TNFRSF21    | 0.484797788 | 1.304389694 | 1.022544545 | -0.34643669 |
| CHST10      | 0.255408945 | 1.008534093 | 1.645117921 | -0.31003813 |
| SELM        | 0.771373059 | 0.873890203 | 4.832159695 | -0.77336712 |
| RP11-325F22 | 4.685632619 | 2.464804499 | 0           | 0           |
| MST1R       | 0.149584877 | 1.749098858 | 1.097913081 | -0.67920621 |
| STX3        | 0.960816884 | 0.687808175 | 0.704986881 | -0.02648342 |
| MFSD6       | 0.739617876 | 1.26885255  | -0.81965351 | 0.214607128 |
| MIR24-2     | 3.074039108 | 0.902292582 | 0           | 0           |
| TNFRSF10A   | 0.635242368 | 0.838437397 | 0           | 0           |
| GABBR1      | 0.39242786  | 0.737479781 | 0.390504688 | -0.95365014 |
| S100A4      | 0.697527654 | 1.237440588 | 3.11304722  | -1.12847127 |
| TMED3       | 0.328076547 | 0.627875008 | 1.451355479 | 0.057198107 |
| LMTK3       | 1.294944472 | 1.961250653 | 3.564144915 | -1.40239854 |
| CNN2        | 0.81624852  | 0.416948713 | 2.852666961 | -0.42151105 |
| NFATC1      | 1.653143846 | 1.475415624 | 0.172371204 | -0.08512421 |
| SGCA        | 1.537368402 | 1.277734093 | -5.07567449 | -1.76849178 |
| HTR7        | 2.532501752 | 1.594807269 | -0.00202291 | -1.6485929  |
| ZNF462      | 0.968928448 | 0.945038463 | 0.20304375  | -0.74766584 |
| EPB41L4A    | 1.003419758 | 1.872561094 | 1.809199423 | -0.75782868 |
| TC2N        | 0.965688086 | 2.417247976 | -1.23340184 | 0.346574759 |
| STK17B      | 1.716620286 | 2.168287525 | -0.78507616 | -0.31330313 |
| FAM43A      | 0.966902199 | 0.659971965 | 0.841216424 | -0.3299344  |
| ZNF682      | 0.13680001  | 0.576439372 | -0.99603891 | -1.89250763 |
| CDR2L       | 0.815217578 | 0.386285093 | 1.748250723 | -0.34780915 |
| ANXA1       | 1.991406906 | 1.186801575 | 2.743889115 | -0.81502721 |
| DBNDD2      | 0.417594478 | 1.249720131 | 0.045740589 | -0.64738754 |
| MCTP2       | 1.142159841 | 1.675440995 | -2.1410761  | 0.633185008 |
| CACNB1      | 0.890016323 | 1.46060689  | 1.009784032 | -1.33825786 |
| TRPC1       | 1.046012759 | 1.182704866 | 0.104822561 | -0.50993548 |
| NCR3LG1     | 2.204869336 | 1.314994001 | 0           | 0           |
| GDPD1       | 0.151884969 | 0.456225784 | 1.556519134 | 0.22929244  |
| ZNF551      | 0.121355535 | 0.455575864 | -3.03887845 | 0.588087816 |
| EFEMP1      | 2.105617219 | 3.017566449 | 0.139138032 | 0.392143356 |

Table S7

|             |             |             |             |             |
|-------------|-------------|-------------|-------------|-------------|
| WDR54       | 0.459415788 | 0.441394098 | 1.399396141 | -0.43772568 |
| BTG2        | 2.467320355 | 1.792530843 | 0.564959251 | -0.00187489 |
| GPR160      | 1.396340345 | 1.034918175 | 1.20326508  | -0.80060957 |
| PCYOX1L     | 0.426053749 | 1.145152699 | 2.203375899 | -0.01942711 |
| ENO2        | 1.084759488 | 1.192619029 | 3.459184102 | -1.15078125 |
| PTPN13      | 0.914716466 | 1.289095093 | 1.084788232 | -0.72349268 |
| MAPK10      | 0.899392576 | 1.283477077 | -0.6359834  | 0           |
| SRGAP1      | 1.073757105 | 1.628761843 | -0.00599513 | -0.69614272 |
| RP11-196G18 | 2.793214711 | 1.714611583 | 0           | 0           |
| METTL24     | 0.682498534 | 2.106161594 | 2.996558569 | -1.03096456 |
| LOXL1-AS1   | 1.329214922 | 2.816722245 | 0           | 0           |
| ZNF135      | 0.10178817  | 0.769142685 | 0           | 0           |
| AC006273.5  | 0.224155669 | 1.73872736  | 0           | 0           |
| SLC7A1      | 2.006805938 | 2.347404156 | 0.938325532 | -0.25197371 |
| KCNN4       | 1.086580225 | 2.182859932 | 5.503213513 | -1.17001185 |
| NRARP       | 0.589072623 | 0.737067314 | 0.137958843 | 0.188097623 |
| LRRC7       | 2.053720096 | 0.689464524 | 2.046602789 | -0.87571617 |
| S100A6      | 0.557342395 | 1.487259118 | 2.541721741 | -0.48296628 |
| DUSP4       | 1.147000758 | 2.43096567  | 0.053108338 | -0.31172098 |
| TES         | 0.928432932 | 0.465380394 | -0.60316517 | -0.49892723 |
| RASSF2      | 1.48731875  | 1.366054192 | 0.592183647 | -0.7977718  |
| PFKP        | 1.477877899 | 1.753700499 | 1.515224062 | -0.29824816 |
| IL32        | 2.067343918 | 0.806527255 | 0           | 0           |
| C11orf63    | 0.880232354 | 1.706194533 | 0           | 1.196357196 |
| PLEKHN1     | 1.456719139 | 2.021228654 | 0           | 0           |
| SERTAD4     | 0.390210124 | 2.884039229 | 0.056768172 | -1.20092151 |
| SPHK1       | 2.842300451 | 2.126092502 | 4.764347255 | -1.66602405 |
| ZNF93       | 1.422373236 | 0.942165909 | 0           | 0           |
| DOCK8       | 0.996795095 | 1.908861688 | -2.04004024 | -0.20705513 |
| DNAJA4      | 1.320862277 | 0.49229688  | -1.01151457 | -0.02828648 |
| GUCY1A3     | 0.89548646  | 0.718872809 | -0.30144881 | -0.64539781 |
| FAT1        | 1.421354184 | 2.270910208 | -1.30135527 | -0.21610587 |
| SEZ6L2      | 1.040257117 | 2.397809249 | 1.068886675 | -0.06164286 |
| ENPP2       | 1.198350295 | 1.929664976 | -1.08667011 | 0.028522079 |
| HAGHL       | 0.268031364 | 0.332350349 | 2.178146775 | -0.0071293  |
| ZNF430      | 0.6769326   | 1.795814664 | 0           | 0           |
| KIF5C       | 1.279217817 | 1.89759322  | 1.370849562 | -0.41713897 |
| PMAIP1      | 1.730625266 | 1.014752865 | 0.189769596 | -0.20676909 |
| MIR155HG    | 2.543750464 | 2.75724954  | 0           | 0           |
| SLC44A3     | 0.175542568 | 0.820793676 | 0.37648656  | -0.24620558 |
| OSM         | 3.773396924 | 2.324794786 | 4.752997379 | -0.83388871 |
| GLIS2       | 1.18976667  | 1.864334848 | 2.498274601 | -0.98027598 |
| HS3ST1      | 1.099570565 | 1.72470383  | 2.222510534 | -1.01324386 |
| MB21D2      | 2.539888278 | 1.784113391 | -0.36031568 | 0.339805558 |
| PAPLN       | 1.256882871 | 2.309630403 | 0.144397142 | -0.45506238 |
| ZNF83       | 0.249080982 | 0.788218764 | 0           | 0           |
| ZNF525      | 0.511293742 | 0.454818334 | 0           | 0           |
| JAK3        | 0.800551581 | 1.828940644 | 1.468633431 | -0.29135619 |
| CD24P4      | 1.339017022 | 2.494232183 | 0           | 0           |

Table S7

|             |             |             |             |             |
|-------------|-------------|-------------|-------------|-------------|
| GLS         | 1.322918038 | 1.827102609 | -0.20745048 | -0.21736782 |
| CDS1        | 0.386526937 | 0.022434366 | 0.859948798 | -0.70780385 |
| PDZK1IP1    | 0.342817575 | 2.434767498 | 4.065199051 | -0.63860919 |
| SGPP2       | 0.638284916 | 1.723217439 | 1.285000845 | -0.93354656 |
| EMILIN2     | 1.896243208 | 1.221483636 | 1.637167225 | -0.36948102 |
| ZNF738      | 1.0514475   | 1.504358159 | 0           | 0           |
| ZNF827      | 1.165787039 | 2.721807567 | 0.516462587 | -0.64577276 |
| KIAA1324L   | 1.355491679 | 1.612951734 | -3.30508645 | 1.323631588 |
| CRIM1       | 0.781119371 | 1.057313486 | -0.46024321 | -0.65827975 |
| ARHGAP22    | 0.687392614 | 2.325269685 | 5.135393936 | -0.31769572 |
| LGALS3      | 1.217279204 | 1.685501097 | 6.121743569 | -0.61762148 |
| SLFN12      | 0.48613251  | 2.291148766 | 2.754823739 | -0.07340418 |
| AC009495.4  | 0.082871298 | 0.025329234 | 0           | 0           |
| GALNT3      | 0.17709092  | 0.36343032  | 1.031816653 | -0.75190058 |
| LAYN        | 0.762533734 | 2.535682896 | 0.911397149 | -0.89248142 |
| CDH11       | 1.09736537  | 2.432279192 | -0.43312496 | -0.76903696 |
| NBEA        | 0.911651208 | 1.894782923 | -0.70210577 | -0.57488602 |
| SUSD1       | 0.876797013 | 0.917097756 | -0.74906316 | 0.075219108 |
| IFI16       | 1.317214892 | 1.596425124 | 0.566185826 | -0.34906572 |
| MICAL1      | 0.546592737 | 1.620364249 | 3.403585531 | -1.01993246 |
| PRDM8       | 0.927517956 | 1.838035751 | 1.770520148 | 0.536291971 |
| EPHA4       | 0.580749773 | 1.363959085 | -1.51186426 | 0.029556525 |
| IL20RA      | 0.080090855 | 1.313858572 | 2.04660982  | -1.64268419 |
| MCOLN3      | 0.253638892 | 1.875359013 | 4.973724831 | -0.90501132 |
| MOXD1       | 2.495510857 | 3.754463961 | -3.29704019 | -0.45701219 |
| ZNF610      | 0.976860014 | 0.975577107 | 0.53091668  | 0.067728228 |
| C2CD4A      | 3.502667779 | 1.726565786 | 0           | 0           |
| PTPN14      | 0.824460375 | 1.271238708 | 0.536739331 | -1.11916829 |
| CLDN4       | 1.523718542 | 1.500800351 | 0.90286625  | 4.359887422 |
| ZNF320      | 0.282642693 | 1.091593482 | 0           | 0           |
| SULT1C4     | 0.516138806 | 1.377452499 | 0           | 0           |
| C1orf198    | 1.105032361 | 1.367112892 | 0.547781443 | -0.29578009 |
| RP11-255H23 | 2.016237105 | 2.218086986 | 0           | 0           |
| RP11-54O7.1 | 1.964259282 | 1.255042881 | 0           | 0           |
| HES4        | 1.331672565 | 0.042840977 | 0           | 0           |
| ZNF439      | 0.591543756 | 1.582088027 | -0.40659866 | -0.06794602 |
| OXCT1       | 0.441251473 | 1.701047003 | -0.81807244 | -0.52546319 |
| HLA-V       | 0.792981973 | 2.244138475 | 0           | 0           |
| HCG4        | 0.821974973 | 0.858716788 | 0           | 0           |
| NACAD       | 1.614622817 | 1.725302453 | 1.523262244 | -0.86669622 |
| KLHL29      | 2.157126502 | 2.674899447 | 0.547185218 | -0.29519063 |
| GRAMD1B     | 0.281701752 | 2.681109967 | 0.976546308 | -0.87094502 |
| BHLHE41     | 1.289631775 | 2.802485691 | 0.00356418  | -0.98062839 |
| CXCL1       | 3.815104415 | 1.936433928 | 0           | 0           |
| ETV4        | 0.175240828 | 2.312607591 | 3.538299575 | 0.171047107 |
| LOXL4       | 2.439114194 | 3.805563263 | 0.319789964 | 0.47019588  |
| SPINT1      | 0.432057384 | 2.606530588 | 3.423875936 | -0.97945187 |
| TUBB3       | 4.479299326 | 1.576469853 | 6.064139936 | -1.1135345  |
| SLFN13      | 0.332886186 | 2.600251475 | -0.23708936 | 0.515935356 |

Table S7

|            |             |             |             |             |
|------------|-------------|-------------|-------------|-------------|
| TESC       | 0.498560447 | 3.023432368 | 5.023022047 | -0.47260813 |
| SSPN       | 1.566765169 | 2.050224228 | -1.40094468 | -0.42427961 |
| HKDC1      | 3.339767783 | 3.686341559 | 3.137298723 | -1.22706771 |
| GPRC5B     | 0.8911855   | 1.683010523 | 1.685622879 | -0.86181882 |
| B3GALT5    | 0.295242739 | 2.656251875 | 2.740563909 | -3.11983636 |
| LEF1       | 1.054739715 | 4.082795842 | 1.225767898 | -0.73433381 |
| CCND2      | 0.868628177 | 2.091185563 | 0.430073817 | -0.73372848 |
| BACE2      | 1.302665731 | 1.307899789 | 0.191029641 | 0.116217126 |
| LAMA2      | 1.461830284 | 1.791332365 | 0.479332918 | -1.0520417  |
| ZNF781     | 0.706753047 | 0.481407497 | -0.81430361 | -0.0279194  |
| WFDC2      | 1.836592792 | 1.764657722 | 3.194504926 | -0.89799602 |
| LPAR2      | 0.411120193 | 0.992865718 | 0.516917288 | -0.24407701 |
| ITGA2      | 2.411046418 | 1.423108505 | 1.628040817 | -0.32498241 |
| COL4A4     | 1.624875183 | 1.844048979 | 0.643094359 | -2.09033184 |
| COL4A3     | 1.912222727 | 3.123070611 | 0.57221495  | -2.08176458 |
| TAF4B      | 1.05680751  | 1.848099368 | -1.18984145 | -0.1937676  |
| ITGAM      | 1.24500796  | 0.768514761 | 1.671292666 | -0.6995265  |
| ASNS       | 0.738250377 | 0.098125823 | 3.349074124 | 0.923001168 |
| SOX4       | 1.131953268 | 2.06689328  | 2.733553451 | -1.01548813 |
| ZNF607     | 0.885344264 | 1.075176048 | 0           | 0           |
| HSPA4L     | 0.533179916 | 0.939154724 | -0.78596701 | -0.15433646 |
| PRSS22     | 0.901031671 | 2.05927043  | 1.511094075 | -2.06894836 |
| KRT80      | 2.613619057 | 3.376386377 | 0.164540239 | -2.50221321 |
| ANXA3      | 0.149794113 | 0.756144232 | 2.155495089 | -0.36803721 |
| DCDC2      | 0.853567312 | 3.513040568 | 1.451574255 | -0.9088206  |
| ZNF665     | 0.769140968 | 0.739227361 | -1.63356111 | 0.106533377 |
| C1orf106   | 0.36439747  | 2.972209382 | 4.272983527 | -0.62248407 |
| ZNF888     | 0.284245963 | 1.135999318 | 0           | 0           |
| BDKRB2     | 2.813337187 | 3.71364186  | 2.87695428  | 0.184576078 |
| ZNF66      | 0.920755911 | 2.144191584 | 0           | 0           |
| AC098614.2 | 0.420751285 | 1.427429664 | 0           | 0           |
| ANKRD18A   | 0.947332166 | 1.405379438 | 0           | 0           |
| FAM201A    | 0.436834133 | 1.49173932  | 0           | 0           |
| KLF5       | 1.765644944 | 1.402395375 | 1.420358943 | -1.5146251  |
| ITGB8      | 1.226969069 | 2.512781376 | 0.728959574 | -1.24749978 |
| ST8SIA1    | 1.701569965 | 3.294852133 | -0.32774387 | -0.81346214 |
| ADAMTS9-AS | 1.032569765 | 1.75582693  | 0           | 0           |
| ADAMTS9    | 1.314709962 | 0.807107381 | 1.233017429 | -0.83254183 |
| ZNF793     | 0.476967183 | 1.145897814 | -0.6359834  | 0           |
| C3orf52    | 2.248289851 | 2.529370233 | 2.838892719 | -0.87557696 |
| CXCR4      | 2.377011518 | 2.282279414 | 2.514741458 | -1.10162754 |
| TGFB2      | 0.993273103 | 2.783802208 | 1.164913687 | -1.19596147 |
| YBX3       | 1.664719093 | 0.598547688 | 0.757473086 | 0.087070567 |
| CXCL6      | 2.445742711 | 2.402487277 | 4.090295744 | 1.491056461 |
| F2RL1      | 1.125366274 | 0.897453834 | 1.555055793 | -0.47640976 |
| GULP1      | 0.505587394 | 1.347249639 | 0.388876027 | -0.28322593 |
| ZNF382     | 0.721867704 | 1.463726471 | 0.128080754 | -0.82234936 |
| EVC        | 0.543922609 | 1.609605956 | 1.886708143 | -0.5250528  |
| TNFRSF11B  | 1.56741943  | 1.055616497 | -2.0558988  | 0.030446701 |

Table S7

|             |             |             |             |             |
|-------------|-------------|-------------|-------------|-------------|
| PDX1        | 1.680217379 | 3.572273076 | -0.57124354 | -0.32104971 |
| MDFI        | 0.993432604 | 2.540690411 | 4.841847246 | -0.87667215 |
| NPNT        | 1.205672605 | 2.399552989 | -0.93908597 | 0.606081048 |
| PMEPA1      | 0.890385694 | 1.858231563 | 2.361950686 | -1.04965398 |
| FAM150B     | 0.631125029 | 1.554397088 | -2.79052859 | 0           |
| WNT10A      | 1.099490929 | 3.902181618 | 8.275334836 | -0.7485932  |
| TTC9        | 1.737628064 | 2.046118111 | -0.41452593 | -0.44701808 |
| TMEM55A     | 1.363943103 | 1.351701331 | -0.030003   | 0.209137359 |
| EVC2        | 0.934428052 | 1.9290622   | 2.324894458 | -0.57591441 |
| HSPB8       | 2.023374575 | 1.480521532 | -0.05878765 | 0.171638857 |
| ZNF431      | 0.759115607 | 1.445572587 | 0           | 0           |
| B3GNT3      | 0.521424586 | 2.940508221 | 0.223032697 | -0.14633702 |
| GABRE       | 0.832272308 | 1.846596224 | 1.053463288 | -0.25436445 |
| CTD-2008P7. | 1.253377316 | 1.869191119 | 0           | 0           |
| TBC1D30     | 0.417075177 | 1.310475041 | -0.02136689 | -0.08514743 |
| GABRB3      | 2.425706177 | 2.792527849 | 0.29379416  | -0.72958559 |
| RASEF       | 0.794656176 | 1.468487475 | 0.800924805 | -1.33339756 |
| VCAN        | 1.773821292 | 2.261859092 | 0.908920018 | -0.4324441  |
| LRRC1       | 1.303055951 | 2.807875704 | 1.327901136 | -0.41266841 |
| KRT7        | 0.907523537 | 2.565046872 | 3.946025056 | -0.44031685 |
| ZNF714      | 0.88171028  | 2.08510623  | 0           | 0           |
| CLIC6       | 1.294168864 | 2.767886155 | 1.890891808 | -1.78371784 |
| DUSP8       | 4.586985136 | 3.376832942 | 0.698955041 | 0.2236662   |
| CDH6        | 0.846314445 | 2.787696495 | 0.236267399 | 0.37240735  |
| EPCAM       | 0.893360611 | 3.716129672 | 3.261441396 | -0.96486618 |
| SNAP25      | 0.394620426 | 1.920915756 | -1.18709319 | 0           |
| ID4         | 2.443038227 | 3.233584123 | 0.396854889 | -1.15573785 |
| SOX9        | 0.679339449 | 2.454247654 | 2.233661955 | -0.26225239 |
| DTNA        | 1.400641779 | 3.285872558 | -1.28183071 | -1.58686594 |
